# Supplementary material
Source: publisher site journal article supplement (https://www.dovepress.com/get_supplementary_file.php?f=354885.docx)
Supplement: Supplementary file 1 [file get_supplementary_file.php]

Supplementary Table 1. GO and KEGG analyses information for all common DEGs.

| ONTOLOGY | ID | Description | pvalue | p.adjust | geneID | Count |
| --- | --- | --- | --- | --- | --- | --- |
| BP | GO:1903311 | regulation of mRNA metabolic process | 3.41765E-11 | 2.08818E-07 | BARD1/C1QBP/CCNB1/DDX5/EIF4G1/HNRNPA1/HNRNPA2B1/HNRNPD/HNRNPK/HNRNPU/TNPO1/MAGOH/MBNL1/MOV10/MYD88/MYOD1/NPM1/YBX1/EXOSC9/PSMA2/PSMA5/PSMB1/PSMB2/PSMB7/PSMC1/PSME1/RBM3/UPF1/REST/SAFB/SET/SRSF1/SRSF7/SNRPA/SRPK1/SUPT5H/TIA1/NELFE/ROCK2/PSMF1/FXR2/GTPBP1/CTR9/DHX34/SART3/RBM5/PSME3/SRSF10/U2AF2/DIS3/SNW1/ZC3H3/PSME4/LARP1/EXOSC2/CARHSP1/GIGYF2/DAZAP1/RBM15B/EXOSC3/ZBTB7A/NBAS/C9orf78/XRN1/SMU1/PCID2/CELF4/CWC22/CELF6/RBM15/SECISBP2/METTL16/PTCD2/ZC3H14/ZC3H12A/RBM17/YTHDC1/TIRAP/LEO1/SRSF12/SREK1 | 81 |
| BP | GO:0050684 | regulation of mRNA processing | 7.33126E-11 | 2.2397E-07 | BARD1/C1QBP/CCNB1/DDX5/HNRNPA1/HNRNPA2B1/HNRNPK/HNRNPU/MAGOH/MBNL1/MYOD1/RBM3/REST/SAFB/SRSF1/SRSF7/SNRPA/SRPK1/SUPT5H/TIA1/NELFE/CTR9/SART3/RBM5/SRSF10/U2AF2/SNW1/ZC3H3/DAZAP1/RBM15B/ZBTB7A/C9orf78/SMU1/CELF4/CWC22/CELF6/RBM15/METTL16/PTCD2/ZC3H14/RBM17/YTHDC1/LEO1/SRSF12/SREK1 | 45 |
| BP | GO:0010498 | proteasomal protein catabolic process | 1.68416E-10 | 3.43007E-07 | AMFR/BIRC2/ARAF/CCNB1/CDC34/PLK3/CSNK1D/GBA/GSK3B/HSPA1B/ATXN3/NFE2L1/PCBP2/PKD1/PLK1/PSMA2/PSMA5/PSMB1/PSMB2/PSMB7/PSMC1/PSME1/RAD23A/SCO1/SGTA/SIAH1/SIAH2/TAF1/TNFAIP1/UBE2E1/UBE2G2/UBE3A/WNT10B/TRIM25/RNF103/BAG6/USP5/CUL1/BTRC/NEMF/AURKB/PTTG1/PSMF1/RNF7/HERPUD1/BCAP31/PSME3/TOPORS/TRIB1/ANAPC10/ARIH2/TRIM3/RBCK1/GIPC1/WWP2/PSME4/UFL1/KCTD2/ARIH1/RNF19A/RCHY1/FBXL3/LRRC29/FBXO2/ERLEC1/KLHL20/USP25/POMT2/GET4/TREM2/FBXW5/ANKIB1/FBXL19/FBXL12/UGGT1/UBQLN4/RCN3/RMND5B/DDA1/TMUB2/FBXL15/HECTD3/TBL1XR1/RNF34/SHARPIN/TMUB1/SPSB2/ZNRF1/SPSB3/RNF185/UBXN11/TMEM129/SPSB4/OSBPL7/FAM122A/AGAP3/ANAPC16/CSNK1A1L/FBXL16/COMMD1/AMN1/UBR1/FBXL13/UBAC2/SPOPL | 105 |
| BP | GO:0043161 | proteasome-mediated ubiquitin-dependent protein catabolic process | 5.4087E-10 | 7.63081E-07 | AMFR/BIRC2/ARAF/CCNB1/CDC34/PLK3/CSNK1D/GBA/GSK3B/HSPA1B/ATXN3/PCBP2/PLK1/PSMA2/PSMA5/PSMB1/PSMB2/PSMB7/PSMC1/PSME1/RAD23A/SGTA/SIAH1/SIAH2/TAF1/TNFAIP1/UBE2E1/UBE2G2/UBE3A/WNT10B/TRIM25/RNF103/BAG6/USP5/CUL1/BTRC/NEMF/AURKB/PTTG1/PSMF1/RNF7/HERPUD1/BCAP31/PSME3/TOPORS/TRIB1/ANAPC10/ARIH2/TRIM3/RBCK1/GIPC1/WWP2/PSME4/UFL1/KCTD2/ARIH1/RNF19A/RCHY1/FBXL3/LRRC29/FBXO2/ERLEC1/KLHL20/FBXW5/ANKIB1/FBXL19/FBXL12/UBQLN4/RMND5B/DDA1/TMUB2/FBXL15/HECTD3/TBL1XR1/RNF34/SHARPIN/TMUB1/SPSB2/ZNRF1/SPSB3/RNF185/UBXN11/TMEM129/SPSB4/FAM122A/AGAP3/ANAPC16/CSNK1A1L/FBXL16/COMMD1/AMN1/UBR1/FBXL13/SPOPL | 94 |
| BP | GO:0008380 | RNA splicing | 6.24453E-10 | 7.63081E-07 | C1QBP/CLK2/DDX5/DHX15/HNRNPA1/HNRNPA2B1/HNRNPD/HNRNPF/HNRNPH3/HNRNPK/HNRNPU/MAGOH/MBNL1/MYOD1/SNU13/YBX1/PCBP2/PIK3R1/PRCC/RBM3/REST/SFPQ/SRSF1/SRSF7/SNRPA/SNRPA1/SNRPD1/SNRPD3/SNRPE/SNRPF/SRPK1/TIA1/COIL/ZPR1/PRPF4B/PRPF3/SCAF11/ZRANB2/DDX23/RBM39/AQR/SART3/THOC1/RBM5/ALYREF/MPHOSPH10/SF3A1/IVNS1ABP/USP39/SRSF10/FASTK/HNRNPUL1/PSIP1/DDX42/U2AF2/RALY/SNW1/ACIN1/KDM1A/SF3B1/SRRM2/SYF2/PRPF31/DAZAP1/RBM15B/ARL6IP4/ZBTB7A/RTCB/RBMX2/SF3B6/LSM7/LUC7L3/C9orf78/CPSF2/PRPF38B/SMU1/WDR33/PRPF40A/CELF4/THOC2/CWC22/LSM2/PTBP2/SCAF1/CELF6/RBM15/METTL16/THOC6/DHX40/TRPT1/PHF5A/RBM17/ZCRB1/YTHDC1/HNRNPLL/TGS1/SRSF12/SREK1/PPP4R2/SNRNP48/U2AF1L4/FAM98B | 102 |
| BP | GO:0048024 | regulation of mRNA splicing, via spliceosome | 3.02387E-09 | 3.0793E-06 | C1QBP/DDX5/HNRNPA1/HNRNPA2B1/HNRNPK/HNRNPU/MAGOH/MBNL1/MYOD1/RBM3/REST/SRSF1/SRSF7/SRPK1/TIA1/SART3/RBM5/SRSF10/U2AF2/SNW1/DAZAP1/RBM15B/ZBTB7A/C9orf78/SMU1/CELF4/CWC22/CELF6/RBM15/METTL16/RBM17/YTHDC1/SRSF12/SREK1 | 34 |
| BP | GO:0043484 | regulation of RNA splicing | 6.93736E-09 | 6.05533E-06 | C1QBP/CLK2/DDX5/HNRNPA1/HNRNPA2B1/HNRNPF/HNRNPK/HNRNPU/MAGOH/MBNL1/MYOD1/PIK3R1/RBM3/REST/SRSF1/SRSF7/SRPK1/TIA1/ZPR1/SART3/RBM5/SRSF10/FASTK/U2AF2/SNW1/DAZAP1/RBM15B/ZBTB7A/C9orf78/SMU1/CELF4/CWC22/PTBP2/CELF6/RBM15/METTL16/RBM17/YTHDC1/HNRNPLL/SRSF12/SREK1 | 41 |
| BP | GO:0000375 | RNA splicing, via transesterification reactions | 2.57859E-08 | 1.91444E-05 | C1QBP/DDX5/DHX15/HNRNPA1/HNRNPA2B1/HNRNPD/HNRNPF/HNRNPH3/HNRNPK/HNRNPU/MAGOH/MBNL1/MYOD1/SNU13/YBX1/PCBP2/PRCC/RBM3/REST/SFPQ/SRSF1/SRSF7/SNRPA/SNRPA1/SNRPD1/SNRPD3/SNRPE/SNRPF/SRPK1/TIA1/COIL/PRPF4B/PRPF3/SCAF11/DDX23/AQR/SART3/RBM5/ALYREF/MPHOSPH10/SF3A1/USP39/SRSF10/HNRNPUL1/PSIP1/DDX42/U2AF2/RALY/SNW1/KDM1A/SF3B1/SRRM2/SYF2/PRPF31/DAZAP1/RBM15B/ZBTB7A/RBMX2/SF3B6/LSM7/LUC7L3/C9orf78/CPSF2/SMU1/WDR33/PRPF40A/CELF4/CWC22/LSM2/PTBP2/CELF6/RBM15/METTL16/DHX40/PHF5A/RBM17/ZCRB1/YTHDC1/TGS1/SRSF12/SREK1/SNRNP48/U2AF1L4 | 83 |
| BP | GO:0051169 | nuclear transport | 2.81997E-08 | 1.91444E-05 | BARD1/PTTG1IP/CD36/GAS6/GSK3B/HMGA1/HNRNPA1/HNRNPA2B1/HSPA9/IFNG/JUP/KPNA3/TNPO1/IPO5/MAGOH/NF1/NPM1/PIK3R1/PKD1/PPP1CC/RANBP2/RANGAP1/UPF1/SRSF1/SRSF7/SNRPD1/SNRPD3/SNRPE/SNRPF/SSB/TPR/RANBP3/HYAL2/BANF1/ZPR1/NEMF/RPL23/ZC3H11A/THOC1/TRIM28/ALYREF/TXNIP/RGS14/MALT1/PKIG/PSIP1/XPOT/U2AF2/NUP160/SMG6/RBM15B/NMD3/SUFU/NUP54/CPSF2/SDAD1/WDR33/NUP133/PCID2/DMAP1/NUP107/THOC2/MAVS/NOL6/UPF3A/THOC6/IPO4/ZC3H12A/SEH1L/POLDIP3/RITA1/YTHDC1/NUP35/U2AF1L4/NUP43/SPRN/RGPD2 | 77 |
| BP | GO:0006403 | RNA localization | 3.77777E-08 | 1.93802E-05 | ATM/DKC1/HNRNPA1/HNRNPA2B1/HNRNPU/MAGOH/NPM1/PURA/RANBP2/UPF1/SFPQ/SRSF1/SRSF7/SSB/TPR/CCT3/RUVBL1/TOMM20/ZC3H11A/THOC1/ALYREF/FLOT1/CCT7/CCT8/XPOT/U2AF2/ZC3H3/NUP160/SMG6/EXOSC2/ZNF385A/MRPL18/RBM15B/EXOSC3/NMD3/SIDT2/NUP54/CPSF2/SDAD1/WDR33/NCBP3/NHP2/NUP133/PCID2/NUP107/THOC2/SENP2/NOL6/UPF3A/THOC6/SEH1L/POLDIP3/YTHDC1/NUP35/EIF5AL1/U2AF1L4/NUP43 | 57 |
| BP | GO:0000377 | RNA splicing, via transesterification reactions with bulged adenosine as nucleophile | 3.80625E-08 | 1.93802E-05 | C1QBP/DDX5/DHX15/HNRNPA1/HNRNPA2B1/HNRNPD/HNRNPF/HNRNPH3/HNRNPK/HNRNPU/MAGOH/MBNL1/MYOD1/SNU13/YBX1/PCBP2/PRCC/RBM3/REST/SFPQ/SRSF1/SRSF7/SNRPA/SNRPA1/SNRPD1/SNRPD3/SNRPE/SNRPF/SRPK1/TIA1/COIL/PRPF4B/PRPF3/SCAF11/DDX23/AQR/SART3/RBM5/ALYREF/SF3A1/USP39/SRSF10/HNRNPUL1/PSIP1/DDX42/U2AF2/RALY/SNW1/KDM1A/SF3B1/SRRM2/SYF2/PRPF31/DAZAP1/RBM15B/ZBTB7A/RBMX2/SF3B6/LSM7/LUC7L3/C9orf78/CPSF2/SMU1/WDR33/PRPF40A/CELF4/CWC22/LSM2/PTBP2/CELF6/RBM15/METTL16/DHX40/PHF5A/RBM17/ZCRB1/YTHDC1/TGS1/SRSF12/SREK1/SNRNP48/U2AF1L4 | 82 |
| BP | GO:0000398 | mRNA splicing, via spliceosome | 3.80625E-08 | 1.93802E-05 | C1QBP/DDX5/DHX15/HNRNPA1/HNRNPA2B1/HNRNPD/HNRNPF/HNRNPH3/HNRNPK/HNRNPU/MAGOH/MBNL1/MYOD1/SNU13/YBX1/PCBP2/PRCC/RBM3/REST/SFPQ/SRSF1/SRSF7/SNRPA/SNRPA1/SNRPD1/SNRPD3/SNRPE/SNRPF/SRPK1/TIA1/COIL/PRPF4B/PRPF3/SCAF11/DDX23/AQR/SART3/RBM5/ALYREF/SF3A1/USP39/SRSF10/HNRNPUL1/PSIP1/DDX42/U2AF2/RALY/SNW1/KDM1A/SF3B1/SRRM2/SYF2/PRPF31/DAZAP1/RBM15B/ZBTB7A/RBMX2/SF3B6/LSM7/LUC7L3/C9orf78/CPSF2/SMU1/WDR33/PRPF40A/CELF4/CWC22/LSM2/PTBP2/CELF6/RBM15/METTL16/DHX40/PHF5A/RBM17/ZCRB1/YTHDC1/TGS1/SRSF12/SREK1/SNRNP48/U2AF1L4 | 82 |
| BP | GO:0006913 | nucleocytoplasmic transport | 1.95685E-07 | 9.19718E-05 | BARD1/PTTG1IP/CD36/GAS6/GSK3B/HNRNPA1/HNRNPA2B1/HSPA9/IFNG/JUP/KPNA3/TNPO1/IPO5/MAGOH/NF1/NPM1/PIK3R1/PKD1/PPP1CC/RANBP2/RANGAP1/UPF1/SRSF1/SRSF7/SNRPD1/SNRPD3/SNRPE/SNRPF/SSB/TPR/RANBP3/HYAL2/ZPR1/NEMF/RPL23/ZC3H11A/THOC1/TRIM28/ALYREF/TXNIP/RGS14/MALT1/PKIG/XPOT/U2AF2/NUP160/SMG6/RBM15B/NMD3/SUFU/NUP54/CPSF2/SDAD1/WDR33/NUP133/PCID2/DMAP1/NUP107/THOC2/MAVS/NOL6/UPF3A/THOC6/IPO4/ZC3H12A/SEH1L/POLDIP3/RITA1/YTHDC1/NUP35/U2AF1L4/NUP43/SPRN/RGPD2 | 74 |
| BP | GO:0000209 | protein polyubiquitination | 3.17659E-07 | 0.000138636 | AMFR/BIRC2/BARD1/BLMH/CDC34/NFE2L1/PSMA2/PSMA5/PSMB1/PSMB2/PSMB7/PSMC1/PSME1/RNF6/SIAH1/SIAH2/TAF1/TPP2/UBE2E1/UBE2G2/UBE2L3/UBE3A/DYSF/CUL1/BTRC/RNF8/PSMF1/HDAC6/PSME3/TOPORS/ANAPC10/ARIH2/TRIM3/RBCK1/WWP2/PSME4/MGRN1/RUSC1/ARIH1/HECTD1/RNF19A/RNF167/IRF2BP1/FBXL3/FBXO2/KLHL20/FBXW5/ANKIB1/RC3H2/FBXL19/FBXL12/RNF125/RNF31/OTUB1/RNF26/FBXL15/RNF34/FBXO11/TNKS2/SHARPIN/ZNRF1/TMEM129/SPSB4/MIB2/FBXL16/RNF152/FBXL13/SHPRH | 68 |
| BP | GO:0051236 | establishment of RNA localization | 6.35924E-07 | 0.000259033 | ATM/HNRNPA1/HNRNPA2B1/HNRNPU/MAGOH/NPM1/PURA/RANBP2/UPF1/SFPQ/SRSF1/SRSF7/SSB/TPR/TOMM20/ZC3H11A/THOC1/ALYREF/FLOT1/XPOT/U2AF2/ZC3H3/NUP160/SMG6/MRPL18/RBM15B/NMD3/SIDT2/NUP54/CPSF2/SDAD1/WDR33/NCBP3/NUP133/PCID2/NUP107/THOC2/SENP2/NOL6/UPF3A/THOC6/SEH1L/POLDIP3/YTHDC1/NUP35/EIF5AL1/U2AF1L4/NUP43 | 48 |
| BP | GO:1903050 | regulation of proteolysis involved in cellular protein catabolic process | 7.02157E-07 | 0.000268136 | ARAF/PLK3/CSNK1D/GBA/GSK3B/HSPA1B/ATXN3/NFE2L1/PKD1/PLK1/PSMC1/PSME1/RAD23A/RPL5/SCO1/SGTA/TAF1/UBE2G2/UBE3A/WNT10B/BAG6/USP5/BTRC/RPL23/PSMF1/HERPUD1/BCAP31/PSME3/TRIB1/ARIH2/GIPC1/UFL1/ARIH1/RNF19A/RCHY1/ERLEC1/CCDC22/HIPK2/USP25/SUFU/TREM2/ANKIB1/UBQLN4/DDA1/RNF185/OSBPL7/FAM122A/CSNK1A1L/PYHIN1/COMMD1/UBAC2 | 51 |
| BP | GO:0042176 | regulation of protein catabolic process | 8.56622E-07 | 0.00030788 | ARAF/BARD1/PTTG1IP/PLK3/CSNK1D/CST3/GBA/GSK3B/HSPA1B/IFNG/MGAT3/ATXN3/MSN/NFE2L1/PIN1/PKD1/PLK1/PSMC1/PSME1/RAD23A/RELA/RPL5/SCO1/SGTA/SNX1/STX5/TAF1/TIMP1/TIMP3/TNF/TNFRSF1B/UBE2G2/UBE3A/WNT10B/RAB7A/BAG6/USP5/DYSF/BTRC/HGS/RPL23/PSMF1/HERPUD1/BCAP31/PSME3/TRIB1/ARIH2/GIPC1/WWP2/ATG4B/UFL1/ATP13A2/ARIH1/RNF19A/RCHY1/TIPARP/ERLEC1/CCDC22/HIPK2/USP25/SNX12/VPS28/AZIN1/SUFU/TREM2/ANKIB1/VPS11/UBQLN4/SOX17/DDA1/RNF185/OSBPL7/FAM122A/CSNK1A1L/PYHIN1/COMMD1/SH3D19/UBAC2 | 78 |
| BP | GO:0050657 | nucleic acid transport | 9.84066E-07 | 0.000316455 | HNRNPA1/HNRNPA2B1/HNRNPU/MAGOH/NPM1/PURA/RANBP2/UPF1/SFPQ/SRSF1/SRSF7/SSB/TPR/TOMM20/ZC3H11A/THOC1/ALYREF/FLOT1/XPOT/U2AF2/ZC3H3/NUP160/SMG6/MRPL18/RBM15B/NMD3/SIDT2/NUP54/CPSF2/SDAD1/WDR33/NCBP3/NUP133/PCID2/NUP107/THOC2/SENP2/NOL6/UPF3A/THOC6/SEH1L/POLDIP3/YTHDC1/NUP35/EIF5AL1/U2AF1L4/NUP43 | 47 |
| BP | GO:0050658 | RNA transport | 9.84066E-07 | 0.000316455 | HNRNPA1/HNRNPA2B1/HNRNPU/MAGOH/NPM1/PURA/RANBP2/UPF1/SFPQ/SRSF1/SRSF7/SSB/TPR/TOMM20/ZC3H11A/THOC1/ALYREF/FLOT1/XPOT/U2AF2/ZC3H3/NUP160/SMG6/MRPL18/RBM15B/NMD3/SIDT2/NUP54/CPSF2/SDAD1/WDR33/NCBP3/NUP133/PCID2/NUP107/THOC2/SENP2/NOL6/UPF3A/THOC6/SEH1L/POLDIP3/YTHDC1/NUP35/EIF5AL1/U2AF1L4/NUP43 | 47 |
| BP | GO:1903362 | regulation of cellular protein catabolic process | 1.14202E-06 | 0.000348886 | ARAF/PTTG1IP/PLK3/CSNK1D/GBA/GSK3B/HSPA1B/MGAT3/ATXN3/MSN/NFE2L1/PKD1/PLK1/PSMC1/PSME1/RAD23A/RPL5/SCO1/SGTA/TAF1/UBE2G2/UBE3A/WNT10B/BAG6/USP5/BTRC/RPL23/PSMF1/HERPUD1/BCAP31/PSME3/TRIB1/ARIH2/GIPC1/UFL1/ATP13A2/ARIH1/RNF19A/RCHY1/ERLEC1/CCDC22/HIPK2/USP25/SUFU/TREM2/ANKIB1/VPS11/UBQLN4/DDA1/RNF185/OSBPL7/FAM122A/CSNK1A1L/PYHIN1/COMMD1/UBAC2 | 56 |
| BP | GO:0071166 | ribonucleoprotein complex localization | 1.39357E-06 | 0.000405463 | HNRNPA2B1/MAGOH/NPM1/RANBP2/UPF1/SRSF1/SRSF7/SSB/TPR/ZC3H11A/THOC1/ALYREF/XPOT/U2AF2/NUP160/SMG6/PRPF31/RBM15B/NMD3/NUP54/CPSF2/SDAD1/WDR33/NUP133/PCID2/NUP107/THOC2/NOL6/THOC6/SEH1L/POLDIP3/YTHDC1/NUP35/U2AF1L4/NUP43 | 35 |
| BP | GO:0042119 | neutrophil activation | 1.61679E-06 | 0.000438692 | ACAA1/AGL/ALDH3B1/ALDOA/AMPD3/ANPEP/ARG1/RHOA/ARSB/B2M/CEACAM1/C5AR1/CAPN1/MS4A3/CD33/CD36/CD47/CR1/CSNK2B/CST3/CTSH/CYBA/CFD/EEF2/STOM/FCER1G/FCGR3B/FCN1/GALNS/GM2A/GRN/HSPA1B/IL15/IMPDH2/JUP/LAIR1/LTA4H/NEU1/PNP/P2RX1/PFKL/PIGR/PLAUR/PSMA2/PSMA5/PSMB1/PSMB7/PTPN6/PTPRC/PTPRN2/RAB3A/RAB5B/RAB27A/RAC1/RAP1A/CCL5/DYNLT1/TNFRSF1B/VCL/RAB7A/VAMP8/DGAT1/SIGLEC5/ACTR2/TCIRG1/TUBB4B/ATP8A1/AGPAT2/CCT8/CKAP4/SLC27A2/LILRB3/DNAJC13/COTL1/OSTF1/PYCARD/DPP7/DERA/YPEL5/GPR84/TOLLIP/ACTR10/KCMF1/TRAPPC1/MMP25/MAGT1/NAPRT/ORMDL3/STK11IP/LRG1/OSCAR/ANO6/TUBB/RAB37/SLCO4C1 | 95 |
| BP | GO:0043312 | neutrophil degranulation | 1.65138E-06 | 0.000438692 | ACAA1/AGL/ALDH3B1/ALDOA/AMPD3/ANPEP/ARG1/RHOA/ARSB/B2M/CEACAM1/C5AR1/CAPN1/MS4A3/CD33/CD36/CD47/CR1/CSNK2B/CST3/CTSH/CYBA/CFD/EEF2/STOM/FCER1G/FCGR3B/FCN1/GALNS/GM2A/GRN/HSPA1B/IMPDH2/JUP/LAIR1/LTA4H/NEU1/PNP/P2RX1/PFKL/PIGR/PLAUR/PSMA2/PSMA5/PSMB1/PSMB7/PTPN6/PTPRC/PTPRN2/RAB3A/RAB5B/RAB27A/RAC1/RAP1A/DYNLT1/TNFRSF1B/VCL/RAB7A/VAMP8/DGAT1/SIGLEC5/ACTR2/TCIRG1/TUBB4B/ATP8A1/AGPAT2/CCT8/CKAP4/SLC27A2/LILRB3/DNAJC13/COTL1/OSTF1/PYCARD/DPP7/DERA/YPEL5/GPR84/TOLLIP/ACTR10/KCMF1/TRAPPC1/MMP25/MAGT1/NAPRT/ORMDL3/STK11IP/LRG1/OSCAR/ANO6/TUBB/RAB37/SLCO4C1 | 93 |
| BP | GO:0002446 | neutrophil mediated immunity | 1.76926E-06 | 0.000450423 | ACAA1/AGL/ALDH3B1/ALDOA/AMPD3/ANPEP/ARG1/RHOA/ARSB/B2M/CEACAM1/C5AR1/CAPN1/MS4A3/CD33/CD36/CD47/CR1/CSNK2B/CST3/CTSH/CYBA/CFD/EEF2/STOM/FCER1G/FCGR3B/FCN1/GALNS/GM2A/GRN/HSPA1B/IMPDH2/JUP/LAIR1/LTA4H/NEU1/PNP/P2RX1/PFKL/PIGR/PLAUR/PSMA2/PSMA5/PSMB1/PSMB7/PTPN6/PTPRC/PTPRN2/RAB3A/RAB5B/RAB27A/RAC1/RAP1A/ADAM17/DYNLT1/TNFRSF1B/VCL/RAB7A/VAMP8/DGAT1/SIGLEC5/ACTR2/TCIRG1/TUBB4B/ATP8A1/AGPAT2/CCT8/CKAP4/SLC27A2/LILRB3/DNAJC13/COTL1/OSTF1/PYCARD/DPP7/DERA/YPEL5/GPR84/TOLLIP/ACTR10/KCMF1/TRAPPC1/MMP25/MAGT1/JAGN1/NAPRT/ORMDL3/STK11IP/LRG1/OSCAR/ANO6/TUBB/RAB37/SLCO4C1 | 95 |
| BP | GO:0002283 | neutrophil activation involved in immune response | 2.16879E-06 | 0.000530051 | ACAA1/AGL/ALDH3B1/ALDOA/AMPD3/ANPEP/ARG1/RHOA/ARSB/B2M/CEACAM1/C5AR1/CAPN1/MS4A3/CD33/CD36/CD47/CR1/CSNK2B/CST3/CTSH/CYBA/CFD/EEF2/STOM/FCER1G/FCGR3B/FCN1/GALNS/GM2A/GRN/HSPA1B/IMPDH2/JUP/LAIR1/LTA4H/NEU1/PNP/P2RX1/PFKL/PIGR/PLAUR/PSMA2/PSMA5/PSMB1/PSMB7/PTPN6/PTPRC/PTPRN2/RAB3A/RAB5B/RAB27A/RAC1/RAP1A/DYNLT1/TNFRSF1B/VCL/RAB7A/VAMP8/DGAT1/SIGLEC5/ACTR2/TCIRG1/TUBB4B/ATP8A1/AGPAT2/CCT8/CKAP4/SLC27A2/LILRB3/DNAJC13/COTL1/OSTF1/PYCARD/DPP7/DERA/YPEL5/GPR84/TOLLIP/ACTR10/KCMF1/TRAPPC1/MMP25/MAGT1/NAPRT/ORMDL3/STK11IP/LRG1/OSCAR/ANO6/TUBB/RAB37/SLCO4C1 | 93 |
| BP | GO:0015931 | nucleobase-containing compound transport | 2.57203E-06 | 0.000604428 | SLC25A6/HNRNPA1/HNRNPA2B1/HNRNPU/MAGOH/NPM1/PURA/RANBP2/UPF1/SFPQ/SRSF1/SRSF7/SSB/TPR/SLC33A1/TOMM20/ZC3H11A/THOC1/ALYREF/FLOT1/SLC35D2/XPOT/U2AF2/ZC3H3/NUP160/SMG6/MRPL18/RBM15B/NMD3/SIDT2/NUP54/CPSF2/SLC35A5/SDAD1/WDR33/SLC35C1/NCBP3/NUP133/PCID2/NUP107/THOC2/SENP2/NOL6/UPF3A/SLC25A23/THOC6/SEH1L/POLDIP3/YTHDC1/NUP35/EIF5AL1/U2AF1L4/SLC35B2/NUP43 | 54 |
| BP | GO:0061136 | regulation of proteasomal protein catabolic process | 3.0928E-06 | 0.000689011 | ARAF/PLK3/CSNK1D/GBA/GSK3B/HSPA1B/ATXN3/NFE2L1/PKD1/PLK1/PSMC1/PSME1/RAD23A/SCO1/SGTA/TAF1/UBE2G2/WNT10B/BAG6/USP5/BTRC/PSMF1/HERPUD1/BCAP31/PSME3/TRIB1/ARIH2/GIPC1/UFL1/ARIH1/RNF19A/RCHY1/ERLEC1/USP25/TREM2/ANKIB1/UBQLN4/DDA1/RNF185/OSBPL7/FAM122A/CSNK1A1L/COMMD1/UBAC2 | 44 |
| BP | GO:0072331 | signal transduction by p53 class mediator | 3.1575E-06 | 0.000689011 | ATM/ATRX/BARD1/BCL3/PTTG1IP/CCNB1/CD74/PLK3/CSNK2B/DDX5/HINT1/HNRNPK/MSH2/MUC1/MYO6/NBN/PDK2/PIN1/RAD1/RAD17/RBBP7/RFC3/RFC5/RPA2/RPL5/SNAI1/SSRP1/TAF1/TAF5/TAF10/TAF11/TFDP2/BRPF1/BAG6/TAF15/AURKB/RPL23/NUAK1/TOPORS/NDRG1/HEXIM1/SUPT16H/SNW1/KDM1A/BOP1/ZNF385A/ANKRD2/HIPK2/PYCARD/RRN3/CNOT6/ATAD5/RNF34/BRIP1/ATRIP/TNKS1BP1/PYHIN1/SPRED2 | 58 |
| BP | GO:0071426 | ribonucleoprotein complex export from nucleus | 3.28652E-06 | 0.000692436 | HNRNPA2B1/MAGOH/NPM1/RANBP2/UPF1/SRSF1/SRSF7/SSB/TPR/ZC3H11A/THOC1/ALYREF/XPOT/U2AF2/NUP160/SMG6/RBM15B/NMD3/NUP54/CPSF2/SDAD1/WDR33/NUP133/PCID2/NUP107/THOC2/NOL6/THOC6/SEH1L/POLDIP3/YTHDC1/NUP35/U2AF1L4/NUP43 | 34 |
| BP | GO:1901796 | regulation of signal transduction by p53 class mediator | 4.75721E-06 | 0.000968884 | ATM/BARD1/PTTG1IP/CD74/PLK3/CSNK2B/DDX5/HNRNPK/MUC1/NBN/PIN1/RAD1/RAD17/RBBP7/RFC3/RFC5/RPA2/RPL5/SNAI1/SSRP1/TAF1/TAF5/TAF10/TAF11/BRPF1/TAF15/AURKB/RPL23/NUAK1/HEXIM1/SUPT16H/KDM1A/BOP1/ZNF385A/ANKRD2/HIPK2/RRN3/ATAD5/RNF34/BRIP1/ATRIP/PYHIN1/SPRED2 | 43 |
| BP | GO:0006405 | RNA export from nucleus | 5.21719E-06 | 0.001028291 | HNRNPA1/HNRNPA2B1/MAGOH/NPM1/RANBP2/UPF1/SRSF1/SRSF7/SSB/TPR/ZC3H11A/THOC1/ALYREF/XPOT/U2AF2/NUP160/SMG6/RBM15B/NMD3/NUP54/CPSF2/SDAD1/WDR33/NUP133/PCID2/NUP107/THOC2/NOL6/THOC6/SEH1L/POLDIP3/YTHDC1/NUP35/U2AF1L4/NUP43 | 35 |
| BP | GO:0050686 | negative regulation of mRNA processing | 5.91759E-06 | 0.001129891 | BARD1/C1QBP/HNRNPA2B1/HNRNPK/SRSF7/SUPT5H/NELFE/CTR9/SRSF10/U2AF2/CELF4/ZC3H14/SRSF12 | 13 |
| BP | GO:0051168 | nuclear export | 6.62802E-06 | 0.001227188 | BARD1/GAS6/GSK3B/HNRNPA1/HNRNPA2B1/HSPA9/MAGOH/NPM1/PKD1/RANBP2/RANGAP1/UPF1/SRSF1/SRSF7/SSB/TPR/RANBP3/NEMF/ZC3H11A/THOC1/ALYREF/MALT1/XPOT/U2AF2/NUP160/SMG6/RBM15B/NMD3/NUP54/CPSF2/SDAD1/WDR33/NUP133/PCID2/NUP107/THOC2/NOL6/THOC6/SEH1L/POLDIP3/RITA1/YTHDC1/NUP35/U2AF1L4/NUP43 | 45 |
| BP | GO:0000381 | regulation of alternative mRNA splicing, via spliceosome | 1.10342E-05 | 0.001982918 | DDX5/HNRNPA1/HNRNPU/MAGOH/MBNL1/MYOD1/REST/SRSF1/SRSF7/SART3/RBM5/SRSF10/RBM15B/ZBTB7A/SMU1/CELF4/CELF6/RBM15/RBM17/SRSF12/SREK1 | 21 |
| BP | GO:0000469 | cleavage involved in rRNA processing | 1.28953E-05 | 0.002251147 | EXOSC9/RPS21/NOP14/RCL1/BOP1/EXOSC2/ABT1/EXOSC3/NHP2/UTP23/RRP36 | 11 |
| BP | GO:0000380 | alternative mRNA splicing, via spliceosome | 1.44691E-05 | 0.002455719 | DDX5/HNRNPA1/HNRNPU/MAGOH/MBNL1/MYOD1/REST/SFPQ/SRSF1/SRSF7/SART3/RBM5/SRSF10/KDM1A/RBM15B/ZBTB7A/SMU1/CELF4/CELF6/RBM15/RBM17/SRSF12/SREK1 | 23 |
| BP | GO:0060759 | regulation of response to cytokine stimulus | 2.00434E-05 | 0.003309875 | BIRC2/BIRC3/ARG1/RUNX1/CD74/CHUK/CYLD/GAS6/HPX/HSPA1B/IFNG/IRAK1/IRF3/IRF7/PAFAH1B1/MAPK7/PTPN6/PTPRC/CCL5/ADAM17/TNF/TXK/NR1H2/VRK2/SPHK1/TAX1BP1/IKBKE/AGPAT2/RBCK1/CDC37/DDX58/LSM14A/RABGEF1/PYCARD/TREM2/PARP14/RNF31/SPPL2B/MAVS/SIGIRR/IFIH1/SHARPIN/PYDC1 | 43 |
| BP | GO:0006611 | protein export from nucleus | 2.29363E-05 | 0.003687911 | BARD1/GAS6/GSK3B/HNRNPA2B1/HSPA9/MAGOH/NPM1/PKD1/RANBP2/RANGAP1/UPF1/SRSF1/SRSF7/SSB/TPR/RANBP3/ZC3H11A/THOC1/ALYREF/XPOT/U2AF2/NUP160/SMG6/RBM15B/NMD3/NUP54/CPSF2/SDAD1/WDR33/NUP133/PCID2/NUP107/THOC2/NOL6/THOC6/SEH1L/POLDIP3/YTHDC1/NUP35/U2AF1L4/NUP43 | 41 |
| BP | GO:1903320 | regulation of protein modification by small protein conjugation or removal | 3.42552E-05 | 0.005366654 | BIRC2/BIRC3/PTTG1IP/CRY1/DAXX/EGR1/HSPA1B/LIMK1/PIN1/PLK1/RELA/RPL5/RPS3/SIAH2/TAF1/UBE2L3/UBE3A/DYSF/SPHK1/RPL23/ATG5/CTR9/HERPUD1/SART3/HDAC4/TOPORS/IVNS1ABP/MALT1/U2AF2/KDM1A/DCUN1D4/UFL1/RCHY1/FBXO2/VPS28/TOLLIP/FANCI/OTUB1/WDR48/FANCM/SENP2/PHF23/ZC3H12A/RASSF5/MASTL/SPSB4/COMMD1/SPOPL/PEF1 | 49 |
| BP | GO:0070555 | response to interleukin-1 | 3.76147E-05 | 0.005745648 | CD47/CHUK/CYBA/EGR1/ETS1/IL1RAP/IRAK1/LGALS9/MTHFR/MYD88/NKX3-1/PRKCI/PSMA2/PSMA5/PSMB1/PSMB2/PSMB7/PSMC1/PSME1/RELA/UPF1/RORA/CCL4/CCL5/CCL21/CCL24/MAP3K7/VRK2/CUL1/HYAL2/SQSTM1/BTRC/PSMF1/ST18/HDAC4/PSME3/ADAMTS7/PSME4/PYCARD/TOLLIP/OTUB1/YTHDC2/ZC3H12A/NLRP7/CCL4L1 | 45 |
| BP | GO:0038061 | NIK/NF-kappaB signaling | 3.95694E-05 | 0.005779907 | BIRC2/BIRC3/RHOA/BCL3/BMP7/CHUK/CYLD/IRAK1/LGALS9/NFKB2/PRDX1/PPM1B/PPP4C/PSMA2/PSMA5/PSMB1/PSMB2/PSMB7/PSMC1/PSME1/RELA/RPS3/MAP3K7/TNF/CUL1/IL18R1/SPHK1/BTRC/PSMF1/IKBKE/PSME3/RBCK1/MALT1/PSME4/DICER1/HDAC7/TLR9/TREM2/RC3H2/ZC3H12A/TIRAP | 41 |
| BP | GO:0001959 | regulation of cytokine-mediated signaling pathway | 3.97309E-05 | 0.005779907 | BIRC2/BIRC3/ARG1/RUNX1/CD74/CHUK/CYLD/GAS6/HPX/HSPA1B/IFNG/IRAK1/IRF3/IRF7/PAFAH1B1/PTPN6/PTPRC/CCL5/ADAM17/TNF/TXK/NR1H2/VRK2/SPHK1/TAX1BP1/IKBKE/AGPAT2/RBCK1/CDC37/LSM14A/RABGEF1/PYCARD/TREM2/PARP14/RNF31/SPPL2B/MAVS/SIGIRR/SHARPIN/PYDC1 | 40 |
| BP | GO:0042254 | ribosome biogenesis | 4.45671E-05 | 0.006332676 | C1QBP/DKC1/GTF3A/SNU13/NPM1/EXOSC9/RPL5/RPL7/RPL24/RPL35A/RPS21/NOP14/BTRC/RRP9/RCL1/MPHOSPH10/WDR3/DIS3/BOP1/EXOSC2/PES1/NOL11/ERAL1/ABT1/MTERF3/EXOSC3/NMD3/MRPS2/SBDS/RSL24D1/NIP7/DDX56/RRN3/TEX10/RPP25/SDAD1/LYAR/NHP2/TSR1/NSUN3/DDX31/MRPS11/MRPS9/MRPL1/NOL6/DDX54/NOC4L/METTL16/RPF1/UTP15/UTP23/MPV17L2/FAM207A/GTPBP10/RRP36/TSR2/ZNF622/TSR3/RPL10L | 59 |
| BP | GO:2000058 | regulation of ubiquitin-dependent protein catabolic process | 5.09477E-05 | 0.006931639 | ARAF/PLK3/CSNK1D/GBA/GSK3B/HSPA1B/PLK1/RAD23A/RPL5/SGTA/TAF1/UBE3A/WNT10B/BAG6/USP5/RPL23/HERPUD1/BCAP31/TRIB1/ARIH2/GIPC1/UFL1/ARIH1/RNF19A/RCHY1/CCDC22/HIPK2/SUFU/ANKIB1/UBQLN4/DDA1/FAM122A/CSNK1A1L/PYHIN1/COMMD1 | 35 |
| BP | GO:0048536 | spleen development | 5.10514E-05 | 0.006931639 | BCL3/CDKN2B/NKX2-5/NFKB2/PKN1/PRKDC/ADAM17/CITED2/FLVCR1/SLC40A1/RC3H2/PCID2/RBM15 | 13 |
| BP | GO:0002335 | mature B cell differentiation | 5.79984E-05 | 0.007583601 | BCL3/MFNG/NOTCH2/PLCG2/POU2F2/ITM2A/MALT1/PLCL2/DLL1/SLAMF8/CMTM7 | 11 |
| BP | GO:1901800 | positive regulation of proteasomal protein catabolic process | 5.83354E-05 | 0.007583601 | PLK3/CSNK1D/GBA/GSK3B/HSPA1B/ATXN3/PLK1/PSMC1/RAD23A/SGTA/TAF1/BAG6/USP5/HERPUD1/BCAP31/TRIB1/ARIH2/ARIH1/RNF19A/RCHY1/TREM2/ANKIB1/DDA1/RNF185/OSBPL7/FAM122A/CSNK1A1L | 27 |
| BP | GO:1900180 | regulation of protein localization to nucleus | 6.66568E-05 | 0.008484861 | CD36/DKC1/GSK3B/IFNG/JUP/IPO5/NF1/PIK3R1/PIN1/PLK1/TPR/CCT3/HYAL2/ZPR1/TRIM28/CCT7/CCT8/LILRB4/PKIG/TRIM29/NMD3/SUFU/NUP54/DMAP1/MAVS/ZC3H12A/RASSF5/PYHIN1/FLCN | 29 |
| BP | GO:0019058 | viral life cycle | 7.13031E-05 | 0.008641424 | GRK2/ANPEP/SCARB1/CD74/CR1/DDX5/STOM/FCN1/GAS6/HSPA1B/KPNA3/LGALS9/NFIA/NOTCH1/NPC1/PC/PCBP2/PCSK5/PI4KA/PPID/NECTIN1/NECTIN2/RAB5A/RAD23A/RANBP2/CCL5/SLC20A2/SRPK1/DYNLT1/TNF/TOP2B/TPR/TRIM25/RAB7A/DEK/VAMP8/HYAL2/BANF1/ATG5/ROCK2/TRIM28/IFITM2/WWP2/NUP160/LARP1/IFIT5/VPS4A/VPS28/NUP54/VPS37C/TRIM62/NUP133/NUP107/MAVS/VPS18/NUCKS1/YTHDC2/ZC3H12A/SEH1L/TBC1D20/NUP35/RAB43/NUP43 | 63 |
| BP | GO:0097193 | intrinsic apoptotic signaling pathway | 7.31372E-05 | 0.008641424 | ATM/ATP2A1/BCL3/PTTG1IP/CD74/CYLD/DDX5/HINT1/HNRNPK/MSH2/MUC1/NBN/NCK1/NKX3-1/PDK2/PIK3R1/PLAUR/PRKDC/MAPK7/RPS3/SFPQ/SIAH1/SKIL/SNAI1/SOD1/TNF/TNFRSF1B/TPT1/VDAC2/BAG6/CUL1/SLC9A3R1/IKBKE/HERPUD1/BCLAF1/TRAP1/BCAP31/TOPORS/STK25/IVNS1ABP/SNW1/KDM1A/DAPK2/ZNF385A/ANKRD2/BBC3/CIDEB/HIPK2/PYCARD/RRN3/USP47/ATAD5/TMEM117/BMF/ZNF622/NACC2/FLCN | 57 |
| BP | GO:0006406 | mRNA export from nucleus | 7.45715E-05 | 0.008641424 | HNRNPA2B1/MAGOH/RANBP2/UPF1/SRSF1/SRSF7/TPR/ZC3H11A/THOC1/ALYREF/U2AF2/NUP160/SMG6/RBM15B/NUP54/CPSF2/WDR33/NUP133/PCID2/NUP107/THOC2/THOC6/SEH1L/POLDIP3/YTHDC1/NUP35/U2AF1L4/NUP43 | 28 |
| BP | GO:0071427 | mRNA-containing ribonucleoprotein complex export from nucleus | 7.45715E-05 | 0.008641424 | HNRNPA2B1/MAGOH/RANBP2/UPF1/SRSF1/SRSF7/TPR/ZC3H11A/THOC1/ALYREF/U2AF2/NUP160/SMG6/RBM15B/NUP54/CPSF2/WDR33/NUP133/PCID2/NUP107/THOC2/THOC6/SEH1L/POLDIP3/YTHDC1/NUP35/U2AF1L4/NUP43 | 28 |
| BP | GO:0000724 | double-strand break repair via homologous recombination | 7.49583E-05 | 0.008641424 | ATM/LIG3/MCM6/NBN/PPP4C/RAD51/RAD51B/RECQL/RPA2/SFPQ/WAS/XRCC2/RECQL5/AP5Z1/REC8/ACTR2/KDM1A/SMCHD1/NIPBL/POLL/RPA4/RNF138/UBQLN4/WDR48/NUCKS1/NABP2/MUS81/MCM8/CCDC155/PPP4R2/MMS22L/GEN1 | 32 |
| BP | GO:0032386 | regulation of intracellular transport | 7.94436E-05 | 0.008988898 | AKT2/ARHGAP1/ATP2A1/BARD1/CACNB3/CD36/PLK3/STOM/FCER1G/FER/FES/GAS6/GSK3B/IFNG/IL4R/INSIG1/JUP/IPO5/LGALS9/MSN/NF1/P2RX1/P2RY4/PDPK1/PIK3R1/PPP1CC/PRKCB/MAP2K2/RAB3A/RAB5A/RANGAP1/RAP1A/SREBF2/STX1A/TPR/UBE2G2/UBE2L3/FZD5/BAP1/VAMP8/HYAL2/SNX4/NAPA/ZPR1/MTMR2/RAB11B/TCAF1/SEC16A/SAE1/BCAP31/TRIM28/ARIH2/SPAG5/GIPC1/PKIG/RAB3GAP1/DNAJC13/ATP13A2/LDLRAP1/ERLEC1/RABGEF1/SNX12/SUFU/NUP54/RNF31/VPS11/DMAP1/MAVS/VPS18/RINT1/TRIM46/ZC3H12A/YIPF5/REEP6/TBC1D20/CNIH2/UBAC2 | 77 |
| BP | GO:0006401 | RNA catabolic process | 8.67547E-05 | 0.009189912 | ATM/DDX5/DKC1/EIF4G1/HNRNPD/HNRNPU/HSPA1B/TNPO1/MAGOH/MOV10/MYD88/NPM1/YBX1/EXOSC9/PSMA2/PSMA5/PSMB1/PSMB2/PSMB7/PSMC1/PSME1/UPF1/RPL5/RPL7/RPL18A/RPL19/RPL24/RPL30/RPL28/RPL34/RPL35A/RPS3/RPS11/RPS15A/RPS21/RPS29/SET/SSB/TNFRSF1B/ZPR1/RPL23/ROCK2/PSMF1/FXR2/GTPBP1/DHX34/PSME3/DIS3/PSME4/SMG6/LARP1/EXOSC2/CARHSP1/GIGYF2/EXOSC3/SIDT2/NBAS/LSM7/XRN1/PCID2/CNOT6/LSM2/UPF3A/SECISBP2/METTL16/ZC3H14/ZC3H12A/WDR61/RNASEH2C/TNKS1BP1/TIRAP/DEDD2/PATL1 | 73 |
| BP | GO:0045732 | positive regulation of protein catabolic process | 8.71521E-05 | 0.009189912 | BARD1/PTTG1IP/PLK3/CSNK1D/GBA/GSK3B/HSPA1B/IFNG/ATXN3/MSN/PLK1/PSMC1/RAD23A/SGTA/SNX1/STX5/TAF1/TNF/TNFRSF1B/RAB7A/BAG6/USP5/HERPUD1/BCAP31/TRIB1/ARIH2/WWP2/ATG4B/ARIH1/RNF19A/RCHY1/TIPARP/CCDC22/VPS28/TREM2/ANKIB1/VPS11/SOX17/DDA1/RNF185/OSBPL7/FAM122A/CSNK1A1L/PYHIN1/SH3D19 | 45 |
| BP | GO:0000725 | recombinational repair | 8.72365E-05 | 0.009189912 | ATM/LIG3/MCM6/NBN/PPP4C/RAD51/RAD51B/RECQL/RPA2/SFPQ/WAS/XRCC2/RECQL5/AP5Z1/REC8/ACTR2/KDM1A/SMCHD1/NIPBL/POLL/RPA4/RNF138/UBQLN4/WDR48/NUCKS1/NABP2/MUS81/MCM8/CCDC155/PPP4R2/MMS22L/GEN1 | 32 |
| BP | GO:0032543 | mitochondrial translation | 8.72365E-05 | 0.009189912 | C1QBP/MRPL49/OXA1L/TUFM/DAP3/MTRF1/WARS2/ERAL1/MRPL18/MTERF3/MRPS18C/YARS2/MRPL4/MRPS2/MRPL30/IARS2/AARS2/NSUN3/MRPS11/MRPS9/MRPS6/MRPL40/MRPL38/MRPL34/MRPL1/MRPS34/GFM2/MPV17L2/GFM1/MRPL53/MTIF3/RPUSD3 | 32 |
| BP | GO:1903312 | negative regulation of mRNA metabolic process | 8.98084E-05 | 0.009246068 | BARD1/C1QBP/HNRNPA2B1/HNRNPD/HNRNPK/HNRNPU/MYD88/YBX1/SRSF7/SUPT5H/NELFE/CTR9/DHX34/SRSF10/U2AF2/LARP1/NBAS/CELF4/SECISBP2/ZC3H14/TIRAP/SRSF12 | 22 |
| BP | GO:0045088 | regulation of innate immune response | 9.08719E-05 | 0.009246068 | BIRC2/BIRC3/ARG1/CEACAM1/C1QBP/CD1D/CD36/CHUK/CR1/CYBA/CYLD/FCER1G/FCN1/FFAR2/GRN/HCK/HPX/HSPA1B/ICAM2/IFNG/IRAK1/IRF3/IRF7/LGALS9/SH2D1A/MUC1/MUC2/MYD88/PDPK1/PIK3C3/PLCG2/PRKACB/PRKDC/PSMA2/PSMA5/PSMB1/PSMB2/PSMB7/PSMC1/PSME1/PTPN6/NECTIN2/RELA/RPS6KA3/CCL5/SFPQ/MAP3K7/TXK/NR1H2/MAPKAPK3/CUL1/BTRC/NCR1/PSMF1/IKBKE/PJA2/RASGRP1/PSME3/FLOT1/HEXIM1/CNPY3/LILRB1/MALT1/CDC37/PSME4/DDX58/TKFC/LSM14A/PYCARD/TLR9/TREM2/PARP14/RNF125/PSPC1/SLAMF8/MAVS/FAM3A/IFIH1/UNC93B1/TIRAP/PYHIN1 | 81 |
| BP | GO:0050852 | T cell receptor signaling pathway | 9.23094E-05 | 0.009246068 | CEACAM1/CACNB3/CD3D/CHUK/CCR7/CYLD/EIF2B1/LCP2/NCK1/PDPK1/PIK3CB/PIK3R1/PLCG2/PSMA2/PSMA5/PSMB1/PSMB2/PSMB7/PSMC1/PSME1/PTPN6/PTPRC/NECTIN2/RELA/RPS3/MAP3K7/TXK/WAS/CUL1/BTRC/THEMIS2/PSMF1/PSME3/RBCK1/MALT1/LILRB4/BTN3A2/PSME4/PHPT1/RC3H2/RNF31/ZC3H12A/ERMAP | 43 |
| BP | GO:0006997 | nucleus organization | 9.91565E-05 | 0.009771718 | BIN1/CCNB1/ETS1/NFE2L1/PAFAH1B1/PLK1/PRKCB/NECTIN2/SRPK1/TPR/BANF1/ZPR1/RNF8/NEK6/PSME4/CTDNEP1/PES1/PITPNB/VPS4A/HIPK2/NUP54/RRN3/NUP133/NUP107/DMRTC2/MFSD14A/REEP4/SEH1L/NUP35/CNEP1R1/SUN3 | 31 |
| BP | GO:0006260 | DNA replication | 0.000114013 | 0.011057458 | ACVRL1/ATM/ATRX/BARD1/BCL6/CDC34/DUT/HMGA1/IGHMBP2/LIG1/LIG3/MCM6/NBN/NFIA/ORC2/ORC4/POLD1/RAD1/PURA/RAC1/RAD17/RAD51/RBBP7/RECQL/UPF1/RFC3/RFC5/RPA2/SET/SSRP1/TNFAIP1/TTF1/ZPR1/RECQL5/THOC1/CHAF1A/ALYREF/NPM2/WDHD1/SUPT16H/PDS5A/POLL/RPA4/REV1/FANCM/SENP2/NUCKS1/ATAD5/BRIP1/ATRIP/MCM8/CDAN1/MMS22L/GEN1 | 54 |
| BP | GO:0031396 | regulation of protein ubiquitination | 0.000116812 | 0.011151902 | BIRC2/BIRC3/PTTG1IP/CRY1/DAXX/HSPA1B/LIMK1/PIN1/PLK1/RPL5/RPS3/SIAH2/TAF1/UBE2L3/UBE3A/DYSF/SPHK1/RPL23/ATG5/CTR9/HERPUD1/TOPORS/IVNS1ABP/MALT1/U2AF2/KDM1A/DCUN1D4/UFL1/RCHY1/FBXO2/VPS28/FANCI/OTUB1/WDR48/FANCM/SENP2/PHF23/RASSF5/MASTL/SPSB4/COMMD1/SPOPL/PEF1 | 43 |
| BP | GO:1903052 | positive regulation of proteolysis involved in cellular protein catabolic process | 0.000127541 | 0.011988816 | PLK3/CSNK1D/GBA/GSK3B/HSPA1B/ATXN3/PLK1/PSMC1/RAD23A/SGTA/TAF1/BAG6/USP5/HERPUD1/BCAP31/TRIB1/ARIH2/ARIH1/RNF19A/RCHY1/CCDC22/TREM2/ANKIB1/DDA1/RNF185/OSBPL7/FAM122A/CSNK1A1L/PYHIN1 | 29 |
| BP | GO:0051031 | tRNA transport | 0.000146066 | 0.013522176 | RANBP2/SSB/TPR/TOMM20/XPOT/NUP160/NUP54/NUP133/NUP107/NOL6/SEH1L/NUP35/NUP43 | 13 |
| BP | GO:1902337 | regulation of apoptotic process involved in morphogenesis | 0.00015077 | 0.013749294 | BMP7/FOXC2/NOTCH1/PAX2/HNF1B/TNFRSF1B/VDR | 7 |
| BP | GO:0008630 | intrinsic apoptotic signaling pathway in response to DNA damage | 0.000155292 | 0.013910074 | ATM/BCL3/CD74/HNRNPK/MSH2/MUC1/PIK3R1/PRKDC/RPS3/SKIL/SNAI1/TNF/TNFRSF1B/TPT1/BAG6/IKBKE/TOPORS/SNW1/KDM1A/ZNF385A/CIDEB/HIPK2/PYCARD/USP47/ATAD5/NACC2 | 26 |
| BP | GO:0002822 | regulation of adaptive immune response based on somatic recombination of immune receptors built from immunoglobulin superfamily domains | 0.000157086 | 0.013910074 | ARG1/B2M/BCL6/CEACAM1/CD1D/CLC/CR1/FCER1G/FCER2/HPX/IL4R/IL6R/MSH2/PKN1/PTPN6/PTPRC/NECTIN2/MAP3K7/TNF/TNFRSF1B/WAS/ZP3/FZD5/IL18R1/THOC1/LILRB1/MALT1/ZBTB1/EXOSC3/RC3H2/ATAD5/ZC3H12A/APLF | 33 |
| BP | GO:0006402 | mRNA catabolic process | 0.000160948 | 0.014048441 | ATM/DDX5/EIF4G1/HNRNPD/HNRNPU/HSPA1B/TNPO1/MAGOH/MOV10/MYD88/NPM1/YBX1/EXOSC9/PSMA2/PSMA5/PSMB1/PSMB2/PSMB7/PSMC1/PSME1/UPF1/RPL5/RPL7/RPL18A/RPL19/RPL24/RPL30/RPL28/RPL34/RPL35A/RPS3/RPS11/RPS15A/RPS21/RPS29/SET/SSB/RPL23/ROCK2/PSMF1/FXR2/GTPBP1/DHX34/PSME3/DIS3/PSME4/SMG6/LARP1/EXOSC2/CARHSP1/GIGYF2/EXOSC3/NBAS/LSM7/XRN1/PCID2/CNOT6/LSM2/UPF3A/SECISBP2/METTL16/ZC3H14/ZC3H12A/WDR61/TNKS1BP1/TIRAP/PATL1 | 67 |
| BP | GO:0016925 | protein sumoylation | 0.000163478 | 0.014068295 | EGR1/RANBP2/RANGAP1/RELA/STX1A/TPR/HDAC4/SAE1/TRIM28/TOPORS/NUP160/SENP6/NUP54/TOLLIP/NUP133/NUP107/KIAA1586/SENP2/IFIH1/SEH1L/NUP35/NUP43 | 22 |
| BP | GO:0032480 | negative regulation of type I interferon production | 0.000173632 | 0.014679931 | CYLD/IRF3/PCBP2/PIN1/PPM1B/UBA7/TRIM25/TAX1BP1/IKBKE/LILRB1/DDX58/PYCARD/RNF125/MAVS/IFIH1 | 15 |
| BP | GO:0032206 | positive regulation of telomere maintenance | 0.000177683 | 0.014679931 | ATM/ATRX/DKC1/HNRNPA1/HNRNPA2B1/HNRNPD/MAP3K4/NBN/MAP2K7/CCT3/AURKB/CCT7/CCT8/NABP2/TNKS2/NEK7 | 16 |
| BP | GO:0051028 | mRNA transport | 0.000179362 | 0.014679931 | HNRNPA1/HNRNPA2B1/MAGOH/RANBP2/UPF1/SRSF1/SRSF7/TPR/ZC3H11A/THOC1/ALYREF/U2AF2/ZC3H3/NUP160/SMG6/RBM15B/NUP54/CPSF2/WDR33/NCBP3/NUP133/PCID2/NUP107/THOC2/SENP2/UPF3A/THOC6/SEH1L/POLDIP3/YTHDC1/NUP35/EIF5AL1/U2AF1L4/NUP43 | 34 |
| BP | GO:1903364 | positive regulation of cellular protein catabolic process | 0.000180196 | 0.014679931 | PTTG1IP/PLK3/CSNK1D/GBA/GSK3B/HSPA1B/ATXN3/MSN/PLK1/PSMC1/RAD23A/SGTA/TAF1/BAG6/USP5/HERPUD1/BCAP31/TRIB1/ARIH2/ARIH1/RNF19A/RCHY1/CCDC22/TREM2/ANKIB1/VPS11/DDA1/RNF185/OSBPL7/FAM122A/CSNK1A1L/PYHIN1 | 32 |
| BP | GO:0016072 | rRNA metabolic process | 0.00018677 | 0.015015321 | DKC1/GTF3A/SNU13/EXOSC9/RPL5/RPL7/RPL35A/RPS21/SMARCA4/NOP14/BTRC/TAF1B/RRP9/GTF3C5/RCL1/MPHOSPH10/WDR3/DIS3/BOP1/EXOSC2/PES1/NOL11/ABT1/EXOSC3/SBDS/XRN1/DDX56/TEX10/RPP25/LYAR/NHP2/TSR1/NSUN3/POLR1E/MRPS11/MRPS9/MRPL1/NOL6/DDX54/NOC4L/METTL16/RPF1/UTP15/UTP23/FAM207A/RRP36/TSR2/GTF3C6/TSR3/DEDD2 | 50 |
| BP | GO:0000086 | G2/M transition of mitotic cell cycle | 0.000195985 | 0.015551563 | ATM/CCNB1/CCNH/CDKN2B/PLK3/CSNK1D/NBN/PAFAH1B1/ABCB1/PLK1/PSMA2/PSMA5/PSMB1/PSMB2/PSMB7/PSMC1/PSME1/RAD17/RAD51B/TUBA4A/WNT10B/TUBA1A/CUL1/SSNA1/BTRC/PKMYT1/AURKB/PSMF1/PSME3/TUBB4B/DCTN2/DCTN3/PSME4/SYF2/VPS4A/GPR132/PPME1/HAUS6/NDE1/FBXL12/USP47/RINT1/FBXL15/HAUS3/CEP76/CEP78/MASTL/CCNB3/TUBB | 49 |
| BP | GO:0031503 | protein-containing complex localization | 0.000223065 | 0.017343499 | ATM/DLG4/HIP1/HNRNPA2B1/HNRNPU/TNPO1/MAGOH/NPM1/PURA/RANBP2/RAP1A/UPF1/RPGR/SFPQ/SRSF1/SRSF7/SSB/TPR/SSNA1/TRIP11/ZC3H11A/THOC1/ALYREF/XPOT/U2AF2/NUP160/SMG6/RBM15B/NMD3/HSPB11/NUP54/CPSF2/SDAD1/WDR33/NUP133/EXOC1/PCID2/NUP107/THOC2/WDR19/NOL6/THOC6/SEH1L/POLDIP3/WDR34/YTHDC1/SNAP47/NUP35/NACC2/DYNLL2/BBS12/U2AF1L4/CNIH2/NUP43 | 54 |
| BP | GO:0060760 | positive regulation of response to cytokine stimulus | 0.000224373 | 0.017343499 | CD74/GAS6/HPX/HSPA1B/IRF3/IRF7/PAFAH1B1/ADAM17/TXK/IKBKE/AGPAT2/DDX58/LSM14A/TREM2/PARP14/MAVS/IFIH1 | 17 |
| BP | GO:0019080 | viral gene expression | 0.000228758 | 0.017343499 | PCBP2/RANBP2/REST/RPL5/RPL7/RPL18A/RPL19/RPL24/RPL30/RPL28/RPL34/RPL35A/RPS3/RPS11/RPS15A/RPS21/RPS29/CCL4/CCL5/SMARCA4/SSB/SUPT5H/TAF11/TPR/NELFE/DENR/EIF3A/CTDP1/RPL23/SNW1/NUP160/NELFB/NUP54/TRIM62/NUP133/NUP107/NUCKS1/SEH1L/NUP35/NUP43 | 40 |
| BP | GO:0002819 | regulation of adaptive immune response | 0.000229922 | 0.017343499 | ARG1/B2M/BCL6/CEACAM1/CD1D/CLC/CR1/FCER1G/FCER2/HPX/IL4R/IL6R/IRF7/MSH2/PKN1/PTPN6/PTPRC/NECTIN2/MAP3K7/TNF/TNFRSF1B/WAS/ZP3/FZD5/IL18R1/THOC1/LILRB1/MALT1/ZBTB1/PYCARD/EXOSC3/RC3H2/ATAD5/ZC3H12A/APLF | 35 |
| BP | GO:0043087 | regulation of GTPase activity | 0.000237177 | 0.017537149 | AKT2/ALDH1A1/ARHGAP1/ARHGAP4/BCL6/CHN1/CCR7/DVL3/GPS1/GSK3B/IPO5/LLGL1/MYO9A/MYO9B/NF1/PAFAH1B1/PDE6D/PIN1/PLXNA1/PLXNA2/PLXNB1/PTPRN2/RANBP2/RANGAP1/RAP1A/RAP1GDS1/RGS10/SBF1/CCL4/CCL5/CCL21/CCL24/SOD1/CDKL5/DYNLT1/WNT11/NPRL3/RANBP3/RGS9/RABEP1/ARHGEF1/ARHGEF11/SGSM2/RABGAP1L/RASGRP1/VAV3/RGS14/FICD/FZD10/RAB3GAP1/TBC1D9B/TBC1D2B/PLXND1/ACAP2/RABGAP1/GAPVD1/PYCARD/ASAP1/TBC1D13/ARHGAP17/PLEKHG6/ADAP2/ZC3H15/RALGAPB/DENND1A/ARHGAP22/RIC8A/ARAP3/RASAL3/TBC1D17/GRTP1/ARHGAP33/EVI5L/ACAP3/AGAP3/TBC1D20/CPEB2/STXBP5/FLCN/FGD2/ARHGAP30/CCL4L1/RGPD2 | 83 |
| BP | GO:0034504 | protein localization to nucleus | 0.00023823 | 0.017537149 | BARD1/BCL3/BMP7/PTTG1IP/CD36/DKC1/GSK3B/HNRNPU/IFNG/JUP/KPNA3/TNPO1/IPO5/NF1/PIK3R1/PIN1/PLK1/RANBP2/RANGAP1/TPR/CCT3/HYAL2/ZPR1/RPL23/TRIM28/TOPORS/CCT7/TXNIP/CCT8/LILRB4/PKIG/CTDNEP1/TRIM29/NMD3/ZBTB7A/SUFU/NUP54/NUP133/DMAP1/NUP107/MAVS/IPO4/ZC3H12A/RASSF5/NUP35/PYHIN1/FLCN/CNEP1R1/CHCHD10/SPRN/RGPD2 | 51 |
| BP | GO:0071347 | cellular response to interleukin-1 | 0.000242981 | 0.017674001 | CD47/CHUK/EGR1/IL1RAP/IRAK1/MYD88/NKX3-1/PSMA2/PSMA5/PSMB1/PSMB2/PSMB7/PSMC1/PSME1/RELA/UPF1/RORA/CCL4/CCL5/CCL21/CCL24/MAP3K7/VRK2/CUL1/HYAL2/SQSTM1/BTRC/PSMF1/ST18/PSME3/ADAMTS7/PSME4/PYCARD/TOLLIP/OTUB1/ZC3H12A/NLRP7/CCL4L1 | 38 |
| BP | GO:0045862 | positive regulation of proteolysis | 0.000257246 | 0.018491435 | RHOA/PLK3/CR1/CSNK1D/CTSH/F12/FGFR4/GBA/GRN/GSK3B/HIP1/HSPA1B/HSPE1/IFNG/LGALS9/MELTF/ATXN3/MMP14/NKX3-1/P2RX1/PLK1/PSMC1/PSME1/RAD23A/REST/RPS3/SGTA/TAF1/CLEC3B/TNF/TNFRSF1B/BAG6/USP5/CFLAR/BTRC/ROCK2/ST18/HERPUD1/SART3/BCAP31/PSME3/TRIB1/ARIH2/CLPX/MALT1/PSME4/BCL2L13/ARIH1/RNF19A/RCHY1/BBC3/CIDEB/CCDC22/PYCARD/TREM2/ANKIB1/RCN3/WDR48/DDA1/ZC3H12A/RNF185/OSBPL7/FAM122A/CSNK1A1L/PYHIN1/SH3D19 | 66 |
| BP | GO:0097064 | ncRNA export from nucleus | 0.000272465 | 0.018952205 | NPM1/RANBP2/SSB/TPR/XPOT/NUP160/NUP54/NUP133/NUP107/NOL6/SEH1L/NUP35/NUP43 | 13 |
| BP | GO:0030183 | B cell differentiation | 0.00027264 | 0.018952205 | ATM/BCL3/BCL6/CYLD/ITGA4/MFNG/MMP14/MSH2/NOTCH2/PIK3R1/PLCG2/POU2F2/PRKDC/PTPN6/PTPRC/ADAM17/ITM2A/DCAF1/HDAC4/TCIRG1/MALT1/ZBTB1/PLCL2/POLM/DLL1/ZBTB7A/TLR9/PCID2/SLAMF8/CMTM7 | 30 |
| BP | GO:1903039 | positive regulation of leukocyte cell-cell adhesion | 0.000272961 | 0.018952205 | AIF1/RHOA/BCL6/RUNX1/CD1D/CD47/CD74/CCR7/CYLD/EFNB1/ETS1/FLOT2/IFNG/IHH/IL4R/IL6R/IL15/IRAK1/ITGA4/LGALS9/NCK1/PNP/PDPK1/PIK3R1/PTPN6/PTPRC/RAC1/RARA/RELA/RPS3/CCL5/CCL21/TNF/ZP3/TNFSF9/RASGRP1/LILRB1/MALT1/LILRB4/ZBTB1/PYCARD/SIRPG/RASAL3/CCDC88B | 44 |
| BP | GO:0044764 | multi-organism cellular process | 0.000294725 | 0.020233367 | BIRC2/BIRC3/C1QBP/GAS6/IRF3/IRF7/PI4KA/NECTIN2/SLC22A5/HYAL2/DDX58/TKFC/LSM14A/RNF125/IFIH1 | 15 |
| BP | GO:0019882 | antigen processing and presentation | 0.000320956 | 0.021789315 | AP1B1/B2M/CAPZB/CD1D/CD36/CD74/CHUK/AP2M1/AP1S1/CCR7/CTSH/CYBA/FCER1G/KIF2A/KLC1/PSMA2/PSMA5/PSMB1/PSMB2/PSMB7/PSMC1/PSME1/RAB5B/RAB27A/CCL21/SH3GL2/TAPBP/WAS/RAB7A/VAMP8/ATG5/PSMF1/BCAP31/PSME3/IFI30/DCTN2/DCTN3/PSME4/KIF4A/PYCARD/TREM2/ACTR10/KLC2/KIF2B/DYNLL2 | 45 |
| BP | GO:0006310 | DNA recombination | 0.000331514 | 0.021882777 | ATM/BCL6/IGHMBP2/LIG3/MCM6/MSH2/NBN/PPP4C/PRKDC/PTPRC/RAD51/RAD51B/RECQL/RPA2/SFPQ/TOP2B/TSN/WAS/XRCC2/RUVBL1/RNF8/RECQL5/DCAF1/AP5Z1/THOC1/REC8/ACTR2/ALYREF/KDM1A/SMCHD1/NIPBL/APEX2/POLL/POLM/TFPT/RPA4/EXOSC3/RNF138/NSMCE4A/INO80D/UBQLN4/WDR48/FANCM/NUCKS1/NABP2/SMC6/ATAD5/MUS81/BRIP1/MCM8/CCDC155/PPP4R2/APLF/MMS22L/GEN1 | 55 |
| BP | GO:0006409 | tRNA export from nucleus | 0.000335048 | 0.021882777 | RANBP2/SSB/TPR/XPOT/NUP160/NUP54/NUP133/NUP107/NOL6/SEH1L/NUP35/NUP43 | 12 |
| BP | GO:0071431 | tRNA-containing ribonucleoprotein complex export from nucleus | 0.000335048 | 0.021882777 | RANBP2/SSB/TPR/XPOT/NUP160/NUP54/NUP133/NUP107/NOL6/SEH1L/NUP35/NUP43 | 12 |
| BP | GO:0002218 | activation of innate immune response | 0.000337811 | 0.021882777 | BIRC2/BIRC3/C1QBP/CD36/CHUK/CYBA/CYLD/FCER1G/FCN1/FFAR2/HCK/HSPA1B/ICAM2/IRAK1/IRF3/IRF7/MUC1/MUC2/MYD88/PDPK1/PIK3C3/PLCG2/PRKACB/PRKDC/PSMA2/PSMA5/PSMB1/PSMB2/PSMB7/PSMC1/PSME1/RELA/RPS6KA3/SFPQ/MAP3K7/MAPKAPK3/CUL1/BTRC/PSMF1/IKBKE/PJA2/PSME3/FLOT1/HEXIM1/CNPY3/MALT1/PSME4/DDX58/TKFC/LSM14A/PYCARD/TLR9/RNF125/PSPC1/MAVS/IFIH1/UNC93B1/TIRAP/PYHIN1 | 59 |
| BP | GO:0030098 | lymphocyte differentiation | 0.000342544 | 0.021882777 | RHOA/ATM/B2M/BCL3/BCL6/RUNX1/CD1D/CD3D/CD74/CLPTM1/CCR7/CR1/CYLD/EGR1/FCER1G/GAS6/KAT2A/IFNG/IHH/IL4R/IL15/ITGA4/LGALS9/MFNG/MMP14/MSH2/NOTCH2/PNP/PIK3R1/PLCG2/POU2F2/PRKDC/PTGER4/PTPN6/PTPRC/RARA/RORA/SOD1/ADAM17/FZD5/TNFSF9/IL18R1/ITM2A/ATG5/DCAF1/HDAC4/RASGRP1/TCIRG1/IKZF1/MALT1/LILRB4/ZBTB1/PLCL2/POLM/DLL1/NCAPH2/ZBTB7A/TLR9/RC3H2/PCID2/SLAMF8/SEMA4A/ZC3H12A/CMTM7 | 64 |
| BP | GO:0002703 | regulation of leukocyte mediated immunity | 0.000344506 | 0.021882777 | ARG1/B2M/BCL6/CEACAM1/CD1D/CLC/CR1/FCER1G/FCER2/FER/FES/HPX/IL4R/LGALS9/SH2D1A/MSH2/PDPK1/PTPN6/PTPRC/NECTIN2/MAP3K7/TNF/TNFRSF1B/WAS/ZP3/FZD5/VAMP8/SNX4/IL18R1/NCR1/THOC1/RASGRP1/LILRB1/MALT1/ZBTB1/DDX58/RABGEF1/EXOSC3/MAVS/ATAD5/APLF | 41 |
| BP | GO:0044839 | cell cycle G2/M phase transition | 0.000347403 | 0.021882777 | ATM/CCNB1/CCNH/CDKN2B/PLK3/CSNK1D/NBN/NPM1/PAFAH1B1/ABCB1/PLK1/PSMA2/PSMA5/PSMB1/PSMB2/PSMB7/PSMC1/PSME1/RAD17/RAD51B/TUBA4A/WNT10B/TUBA1A/CUL1/SSNA1/BTRC/PKMYT1/AURKB/PSMF1/PSME3/TUBB4B/DCTN2/DCTN3/PSME4/SYF2/VPS4A/GPR132/PPME1/HAUS6/NDE1/FBXL12/USP47/RINT1/FBXL15/HAUS3/ATAD5/CEP76/CEP78/MASTL/CCNB3/TUBB | 51 |
| BP | GO:0032436 | positive regulation of proteasomal ubiquitin-dependent protein catabolic process | 0.00038004 | 0.023694348 | PLK3/CSNK1D/GBA/GSK3B/HSPA1B/PLK1/RAD23A/SGTA/TAF1/USP5/HERPUD1/BCAP31/TRIB1/ARIH2/ARIH1/RNF19A/RCHY1/ANKIB1/DDA1/FAM122A/CSNK1A1L | 21 |
| BP | GO:0043487 | regulation of RNA stability | 0.000386152 | 0.023832228 | DKC1/EIF4G1/HNRNPD/HNRNPU/TNPO1/MOV10/MYD88/NPM1/YBX1/EXOSC9/PSMA2/PSMA5/PSMB1/PSMB2/PSMB7/PSMC1/PSME1/UPF1/SET/TNFRSF1B/ROCK2/PSMF1/FXR2/PSME3/DIS3/PSME4/SMG6/LARP1/EXOSC2/CARHSP1/GIGYF2/EXOSC3/XRN1/PCID2/METTL16/ZC3H14/ZC3H12A/TIRAP | 38 |
| BP | GO:0006302 | double-strand break repair | 0.000408911 | 0.024737011 | ATM/BARD1/LIG3/MCM6/MGMT/MSH2/NBN/OGG1/PPP4C/PRKDC/RAD51/RAD51B/RECQL/RPA2/SFPQ/WAS/XRCC2/DEK/RNF8/RECQL5/AP5Z1/REC8/ACTR2/KDM1A/SMCHD1/NIPBL/POLL/POLM/RPA4/ZBTB7A/RNF138/TDP2/OTUB1/UBQLN4/WDR48/NUCKS1/NABP2/MUS81/BRIP1/SPIRE2/MCM8/TNKS1BP1/CDCA5/CCDC155/PPP4R2/APLF/MMS22L/GEN1 | 48 |
| BP | GO:0019079 | viral genome replication | 0.000412958 | 0.024737011 | GRK2/DDX5/STOM/GAS6/NFIA/NOTCH1/PCBP2/PI4KA/PPID/RAB5A/RAD23A/CCL5/SRPK1/TNF/TOP2B/DEK/BANF1/ATG5/ROCK2/TRIM28/IFITM2/LARP1/IFIT5/MAVS/NUCKS1/YTHDC2/ZC3H12A/TBC1D20 | 28 |
| BP | GO:0032434 | regulation of proteasomal ubiquitin-dependent protein catabolic process | 0.000412958 | 0.024737011 | ARAF/PLK3/CSNK1D/GBA/GSK3B/HSPA1B/PLK1/RAD23A/SGTA/TAF1/WNT10B/BAG6/USP5/HERPUD1/BCAP31/TRIB1/ARIH2/GIPC1/UFL1/ARIH1/RNF19A/RCHY1/ANKIB1/UBQLN4/DDA1/FAM122A/CSNK1A1L/COMMD1 | 28 |
| BP | GO:2001242 | regulation of intrinsic apoptotic signaling pathway | 0.000425027 | 0.025212793 | PTTG1IP/CD74/CYLD/HNRNPK/MUC1/NCK1/NKX3-1/PLAUR/MAPK7/RPS3/SFPQ/SIAH1/SKIL/SNAI1/SOD1/TPT1/VDAC2/SLC9A3R1/HERPUD1/BCLAF1/TRAP1/BCAP31/IVNS1ABP/KDM1A/DAPK2/ZNF385A/ANKRD2/BBC3/PYCARD/RRN3/USP47/ATAD5/BMF/NACC2/FLCN | 35 |
| BP | GO:0000462 | maturation of SSU-rRNA from tricistronic rRNA transcript (SSU-rRNA, 5.8S rRNA, LSU-rRNA) | 0.000455276 | 0.026747447 | RPS21/NOP14/BTRC/RCL1/ABT1/TSR1/MRPS11/MRPS9/UTP23/FAM207A/RRP36/TSR2 | 12 |
| BP | GO:0042306 | regulation of protein import into nucleus | 0.000464502 | 0.027029596 | CD36/IFNG/JUP/IPO5/NF1/PIK3R1/TPR/HYAL2/ZPR1/TRIM28/PKIG/SUFU/NUP54/DMAP1/MAVS/ZC3H12A | 16 |
| BP | GO:1904353 | regulation of telomere capping | 0.000474859 | 0.027371561 | ATM/HNRNPD/MAP3K4/NBN/MAP2K7/AURKB/SMG6/NABP2/TNKS2/NEK7 | 10 |
| BP | GO:0001961 | positive regulation of cytokine-mediated signaling pathway | 0.00048228 | 0.027539519 | CD74/GAS6/HPX/HSPA1B/IRF3/IRF7/PAFAH1B1/ADAM17/TXK/IKBKE/AGPAT2/LSM14A/TREM2/PARP14/MAVS | 15 |
| BP | GO:0045930 | negative regulation of mitotic cell cycle | 0.000525986 | 0.029122302 | ATM/ATRX/BCL6/BMP7/BTG1/CCNB1/CDKN2B/PLK3/MSH2/MUC1/NBN/NKX3-1/PKD2/PLK1/PRCC/PRKDC/PSMA2/PSMA5/PSMB1/PSMB2/PSMB7/PSMC1/PSME1/RAD17/RBL1/RPA2/RPL24/TFDP2/TNF/TOP2B/TPR/FZD3/MAD1L1/CUL1/AURKB/PTTG1/SLC9A3R1/PSMF1/KNTC1/PSME3/BTG3/PSME4/ZNF385A/SYF2/GIGYF2/VPS4A/GPR132/HECA/USP47/PCID2/CNOT6/CTDSP1/RINT1/YTHDC2/INTS3/NABP2/MUS81/TNKS1BP1/TPRA1/NACC2/GEN1 | 61 |
| BP | GO:0032785 | negative regulation of DNA-templated transcription, elongation | 0.000526318 | 0.029122302 | HNRNPU/SUPT5H/NELFE/RNF8/RECQL5/NELFB/EAPP | 7 |
| BP | GO:1904748 | regulation of apoptotic process involved in development | 0.000526318 | 0.029122302 | BMP7/FOXC2/NOTCH1/PAX2/HNF1B/TNFRSF1B/VDR | 7 |
| BP | GO:0031647 | regulation of protein stability | 0.000529063 | 0.029122302 | CCNH/CREBL2/CTSH/DVL3/FLOT2/KAT2A/GRN/HIP1/HSPA1B/ID1/PIM1/PIK3R1/PIN1/PLK1/PRKDC/PEX19/RAD23A/RPL5/SIAH1/STK4/TAF1/CCT3/VHL/WNT10B/BAG6/USP9X/BTRC/RPL23/SEC16A/HDAC6/FLOT1/CCT7/CCT8/GIPC1/CDC37/FBXL3/PYCARD/USP25/GET4/USP47/CDC37L1/VPS11/NCLN/SENP2/P3H1/SOX17/NAA16/MCM8/TMEM88/PYHIN1/RNF149/CCDC88C/DNLZ | 53 |
| BP | GO:0000466 | maturation of 5.8S rRNA from tricistronic rRNA transcript (SSU-rRNA, 5.8S rRNA, LSU-rRNA) | 0.000535114 | 0.029192373 | EXOSC9/RPS21/NOP14/RCL1/BOP1/EXOSC2/PES1/ABT1/EXOSC3 | 9 |
| BP | GO:0009048 | dosage compensation by inactivation of X chromosome | 0.000563796 | 0.0304849 | HNRNPU/UPF1/SMCHD1/RBM15B/LRIF1/PRDM14/RBM15/YTHDC1 | 8 |
| BP | GO:0002706 | regulation of lymphocyte mediated immunity | 0.000585316 | 0.031098116 | ARG1/B2M/BCL6/CEACAM1/CD1D/CLC/CR1/FCER1G/FCER2/HPX/LGALS9/SH2D1A/MSH2/PTPN6/PTPRC/NECTIN2/MAP3K7/TNF/TNFRSF1B/WAS/ZP3/FZD5/IL18R1/NCR1/THOC1/RASGRP1/LILRB1/MALT1/ZBTB1/EXOSC3/ATAD5/APLF | 32 |
| BP | GO:0051092 | positive regulation of NF-kappaB transcription factor activity | 0.000585316 | 0.031098116 | CD36/CHUK/FER/FLOT2/HSPA1B/IL1RAP/IRAK1/LGALS9/TRIM37/MYD88/NFKB2/NPM1/PRKCB/PRKCH/PRKCI/RELA/RPS3/MAP3K7/TNF/TRIM25/IL18R1/CFLAR/SPHK1/FLOT1/RBCK1/MALT1/PYCARD/ZBTB7A/TLR9/RNF31/TRIM62/TIRAP | 32 |
| BP | GO:2000060 | positive regulation of ubiquitin-dependent protein catabolic process | 0.000593538 | 0.031263089 | PLK3/CSNK1D/GBA/GSK3B/HSPA1B/PLK1/RAD23A/SGTA/TAF1/USP5/HERPUD1/BCAP31/TRIB1/ARIH2/ARIH1/RNF19A/RCHY1/CCDC22/ANKIB1/DDA1/FAM122A/CSNK1A1L/PYHIN1 | 23 |
| BP | GO:1901990 | regulation of mitotic cell cycle phase transition | 0.000614497 | 0.032090377 | AIF1/ATM/CCNB1/CDKN2B/PLK3/CSNK1D/EIF4G1/MUC1/NBN/PAFAH1B1/PKD1/PKD2/PLK1/PRKDC/PSMA2/PSMA5/PSMB1/PSMB2/PSMB7/PSMC1/PSME1/PTPN6/RAD17/RAD51B/RBL1/RPA2/ADAM17/TFDP2/TPR/TUBA4A/UBE2E1/WNT10B/TUBA1A/MAD1L1/CUL1/SSNA1/BTRC/AURKB/PSMF1/KNTC1/PSME3/NPM2/TUBB4B/ANAPC10/DCTN2/NEK6/DCTN3/PSME4/ZNF385A/SYF2/GIGYF2/VPS4A/TMOD3/GPR132/HAUS6/NDE1/USP47/PCID2/MEPCE/CNOT6/CTDSP1/SENP2/RINT1/HAUS3/ATAD5/CEP76/CEP78/CCNB3/TNKS1BP1/CDCA5/ANAPC16/PLK5/TPRA1/NACC2/TUBB/GEN1 | 76 |
| BP | GO:0140053 | mitochondrial gene expression | 0.000623181 | 0.032235006 | C1QBP/MRPL49/OXA1L/TUFM/DAP3/MTERF1/MTRF1/WARS2/ERAL1/MRPL18/MTERF3/MRPS18C/YARS2/MRPL4/MRPS2/MRPL30/IARS2/AARS2/NSUN3/MRPS11/MRPS9/MRPS6/MRPL40/MRPL38/MRPL34/MRPL1/MRPS34/GFM2/MPV17L2/GFM1/MRPL53/MTIF3/RPUSD3/CHCHD10 | 34 |
| BP | GO:0030490 | maturation of SSU-rRNA | 0.000627818 | 0.032235006 | RPS21/NOP14/BTRC/RCL1/NOL11/ABT1/TSR1/MRPS11/MRPS9/UTP23/FAM207A/RRP36/TSR2/TSR3 | 14 |
| BP | GO:0048193 | Golgi vesicle transport | 0.000639291 | 0.032550544 | VPS51/CAPZB/CSNK1D/GAS6/GOLGA4/INSIG1/KIF2A/KLC1/LLGL1/PRKCI/PROS1/VPS52/SNX1/STX5/TAPBP/VAMP8/NAPA/RABEP1/SGSM2/SEC16A/BCAP31/COG5/DCTN2/YIF1A/RER1/DCTN3/COPE/ANKRD28/DDHD2/PITPNB/KIF4A/SEC22A/KLHL20/CCDC22/TMED5/TRAPPC12/BET1L/SPTBN5/TRAPPC4/NBAS/ERGIC3/CCDC93/CCDC91/EXOC1/ACTR10/BCAP29/GOPC/SCYL1/TRAPPC1/RINT1/CREB3L2/LMF1/KLC2/YIPF5/AMN/COG8/KIF2B/CEP19/TBC1D20/DYNLL2/EXOC8/COMMD1/CNIH2/RAB43/PEF1 | 65 |
| BP | GO:0039528 | cytoplasmic pattern recognition receptor signaling pathway in response to virus | 0.000674584 | 0.033968469 | BIRC2/BIRC3/C1QBP/IRF3/IRF7/DDX58/TKFC/LSM14A/RNF125/IFIH1 | 10 |
| BP | GO:0006364 | rRNA processing | 0.000678257 | 0.033968469 | DKC1/SNU13/EXOSC9/RPL5/RPL7/RPL35A/RPS21/NOP14/BTRC/RRP9/RCL1/MPHOSPH10/WDR3/DIS3/BOP1/EXOSC2/PES1/NOL11/ABT1/EXOSC3/SBDS/DDX56/TEX10/RPP25/LYAR/NHP2/TSR1/NSUN3/MRPS11/MRPS9/MRPL1/NOL6/DDX54/NOC4L/METTL16/RPF1/UTP15/UTP23/FAM207A/RRP36/TSR2/TSR3 | 42 |
| BP | GO:0033108 | mitochondrial respiratory chain complex assembly | 0.000694352 | 0.034491776 | BCS1L/NDUFA5/NDUFA10/NDUFB5/NDUFB8/NDUFS4/NDUFS8/NDUFV2/NDUFV3/OXA1L/SCO1/TAZ/NDUFAF4/ECSIT/NDUFB11/COA1/AARS2/IMMP2L/COX19/NDUFAF2/NDUFA11/COX18/COA5 | 23 |
| BP | GO:0032479 | regulation of type I interferon production | 0.000713973 | 0.035180456 | CHUK/CYLD/IRAK1/IRF3/IRF7/MYD88/NFKB2/PCBP2/PIN1/PLCG2/PPM1B/PRKDC/RELA/UBA7/TRIM25/TAX1BP1/IKBKE/FLOT1/LILRB1/DDX58/CRCP/PYCARD/TLR9/RNF125/MAVS/IFIH1/RNF26/TIRAP | 28 |
| BP | GO:0030100 | regulation of endocytosis | 0.00072623 | 0.035270323 | ABL2/BIN1/B2M/CD36/SCARB1/CD47/CD151/CYBA/DLG4/FCER1G/GAS6/HCK/HIP1/HNRNPK/IFNG/IL15/PIK3CB/PLCG2/PPP3CC/PTPRC/RAB5A/RAB5B/RAB27A/RAC1/RAP1A/CCL21/SH3GL2/SOD1/TNF/NR1H2/DYSF/SPHK1/MTMR2/UNC119/ATG5/ZFYVE16/SNX17/FLOT1/LILRB1/PACSIN2/LDLRAP1/RABGEF1/DLL1/PYCARD/SNX12/VPS28/TREM2/SIRPG/LYAR/ANKRD13B/ANO6/ANKRD13D | 52 |
| BP | GO:1903706 | regulation of hemopoiesis | 0.000738007 | 0.035270323 | RHOA/B2M/BCL6/CEACAM1/RUNX1/CD74/CLPTM1/CR1/CSF3/CYLD/ESRRA/ETS1/FES/GABPA/GAS6/KAT2A/HSPA1B/HSPA9/IFNG/IHH/IL4R/IL15/IRF7/LGALS9/LMO2/MMP14/MOV10/NF1/NOTCH1/NOTCH2/PNP/ROR2/PIM1/PIK3R1/PRKCB/PSMA2/PSMA5/PSMB1/PSMB2/PSMB7/PSMC1/PSME1/PTPN6/PTPRC/RARA/SOD1/TFE3/TNF/TNFSF9/PSMF1/CTR9/SETD1A/RASGRP1/PSME3/TRIB1/N4BP2L2/LILRB1/MALT1/LILRB4/LILRB3/WDR5/ZBTB1/ACIN1/PSME4/DLL1/KLF13/IL17D/TLR9/TREM2/RC3H2/P4HTM/PCID2/SLAMF8/CTNNBIP1/RBM15/ZC3H12A/WDR61/LEO1/FLCN/HES5 | 80 |
| BP | GO:0034470 | ncRNA processing | 0.000747443 | 0.035270323 | DKC1/HNRNPA2B1/SNU13/EXOSC9/RPL5/RPL7/RPL35A/RPS21/SSB/TARBP1/NOP14/BTRC/RRP9/RCL1/MPHOSPH10/WDR3/DIS3/BOP1/EXOSC2/DICER1/PES1/ELP5/NOL11/ABT1/EXOSC3/SBDS/RTCB/TRMT13/DDX56/TEX10/RPP25/THG1L/ELP3/INTS10/LYAR/NHP2/TSR1/INTS9/DUS3L/AARS2/INTS2/THADA/NSUN3/DUS1L/MRPS11/MRPS9/MRPL1/NOL6/INTS3/DDX54/NOC4L/METTL16/RPF1/URM1/TRPT1/UTP15/UTP23/FAM207A/RRP36/TSR2/CTU1/TRMT61A/TSR3/TYW3/TRUB1/FAM98B/TYW1B | 67 |
| BP | GO:0000478 | endonucleolytic cleavage involved in rRNA processing | 0.000752132 | 0.035270323 | RPS21/NOP14/RCL1/BOP1/ABT1/UTP23 | 6 |
| BP | GO:0000479 | endonucleolytic cleavage of tricistronic rRNA transcript (SSU-rRNA, 5.8S rRNA, LSU-rRNA) | 0.000752132 | 0.035270323 | RPS21/NOP14/RCL1/BOP1/ABT1/UTP23 | 6 |
| BP | GO:0002923 | regulation of humoral immune response mediated by circulating immunoglobulin | 0.000752132 | 0.035270323 | CR1/FCER2/HPX/PTPN6/PTPRC/TNF | 6 |
| BP | GO:0032984 | protein-containing complex disassembly | 0.000756205 | 0.035270323 | ADD2/MRPL49/CAPG/CAPZB/CFL1/CLN3/DVL3/GBA/GSK3B/HMGA1/KIF2A/KLC1/OXA1L/PEX14/PPP1CA/UPF1/SET/SH3GL2/SMARCA4/TNF/DAP3/FZD5/DENR/VAMP8/NAPA/RPL23/MTRF1/HDAC6/KATNB1/TRIOBP/SUPT16H/TWF2/ERAL1/VPS4A/MRPL18/N6AMT1/TMOD3/MRPS18C/MRPL4/MRPS2/MRPL30/SPTBN5/UBQLN4/MID1IP1/MRPS11/MRPS9/MRPS6/MRPL40/MRPL38/MRPL34/MRPL1/MRPS34/PHF23/GFM2/KIF2B/MRPL53/EIF5AL1/MTIF3/CHCHD10 | 59 |
| BP | GO:0043123 | positive regulation of I-kappaB kinase/NF-kappaB signaling | 0.000775602 | 0.035389787 | BIRC2/BIRC3/RHOA/CD36/CD74/CHUK/CCR7/IRAK1/IRF3/LGALS9/MYD88/PRKCB/RELA/CCL21/SLC20A1/MAP3K7/TNF/TRIM25/CFLAR/IKBKE/RBCK1/NEK6/MALT1/IFIT5/CCDC22/TLR9/ZDHHC13/CC2D1A/RNF31/TRIM62/MAVS/SHARPIN/TMEM106A/TIRAP/MIB2/JMJD8/SLC35B2 | 37 |
| BP | GO:0022409 | positive regulation of cell-cell adhesion | 0.000776972 | 0.035389787 | AIF1/RHOA/BCL6/BMP7/RUNX1/CD1D/CD47/CD74/CCR7/CYLD/EFNB1/ETS1/FLOT2/IFNG/IHH/IL4R/IL6R/IL15/IRAK1/ITGA4/LGALS9/NCK1/PNP/PDPK1/PIK3R1/PTPN6/PTPRC/RAC1/RARA/RELA/RPS3/CCL5/CCL21/TNF/ZP3/TNFSF9/RASGRP1/FLOT1/CITED2/LILRB1/MALT1/LILRB4/ZBTB1/PYCARD/KIF26B/SIRPG/RASAL3/CCDC88B | 48 |
| BP | GO:0002700 | regulation of production of molecular mediator of immune response | 0.00078462 | 0.035389787 | ARG1/B2M/BCL6/CD36/CD74/CLC/FCER1G/FFAR2/HPX/IL4R/MSH2/PKN1/PRKDC/PTPRC/MAP3K7/TNF/TNFRSF1B/FZD5/IL18R1/ATG5/THOC1/LILRB1/MALT1/DDX58/EXOSC3/TLR9/MAVS/CUEDC2/ATAD5/APLF | 30 |
| BP | GO:0010389 | regulation of G2/M transition of mitotic cell cycle | 0.000785951 | 0.035389787 | ATM/CCNB1/CSNK1D/NBN/PAFAH1B1/PLK1/PSMA2/PSMA5/PSMB1/PSMB2/PSMB7/PSMC1/PSME1/RAD17/RAD51B/TUBA4A/WNT10B/TUBA1A/CUL1/SSNA1/AURKB/PSMF1/PSME3/TUBB4B/DCTN2/DCTN3/PSME4/SYF2/VPS4A/GPR132/HAUS6/NDE1/USP47/RINT1/HAUS3/CEP76/CEP78/CCNB3/TUBB | 39 |
| BP | GO:0051181 | cofactor transport | 0.000797731 | 0.035389787 | ABCB7/HPX/SLC19A1/TCN2/SLC25A11/SLC5A6/SLC33A1/SLC9A3R1/FLVCR1/SLC22A17/SLC48A1/LMBRD1/AMN/SLC25A26 | 14 |
| BP | GO:0006414 | translational elongation | 0.000800896 | 0.035389787 | MRPL49/DPH2/EEF2/OXA1L/SRP9/TUFM/DAP3/NEMF/GTPBP1/ERAL1/MRPL18/MRPS18C/MRPL4/MRPS2/MRPL30/GTPBP2/MRPS11/MRPS9/MRPS6/MRPL40/MRPL38/MRPL34/MRPL1/MRPS34/SECISBP2/GFM1/MRPL53/CPEB2/EIF5AL1 | 29 |
| BP | GO:1904358 | positive regulation of telomere maintenance via telomere lengthening | 0.000806191 | 0.035389787 | ATM/DKC1/HNRNPA1/HNRNPA2B1/MAP3K4/MAP2K7/CCT3/AURKB/CCT7/CCT8/TNKS2/NEK7 | 12 |
| BP | GO:0019083 | viral transcription | 0.000809353 | 0.035389787 | RANBP2/REST/RPL5/RPL7/RPL18A/RPL19/RPL24/RPL30/RPL28/RPL34/RPL35A/RPS3/RPS11/RPS15A/RPS21/RPS29/CCL4/CCL5/SMARCA4/SUPT5H/TAF11/TPR/NELFE/CTDP1/RPL23/SNW1/NUP160/NELFB/NUP54/TRIM62/NUP133/NUP107/NUCKS1/SEH1L/NUP35/NUP43 | 36 |
| BP | GO:0043620 | regulation of DNA-templated transcription in response to stress | 0.000814115 | 0.035389787 | EGR1/HSF2/HSF4/DNAJB1/MUC1/NCK1/NOTCH1/MAPK7/PSMA2/PSMA5/PSMB1/PSMB2/PSMB7/PSMC1/PSME1/RELA/RPS6KA3/TAF1/VHL/PSMF1/BCLAF1/PSME3/CITED2/RGS14/PSME4/HIGD1A/ANKRD2/CHD6 | 28 |
| BP | GO:0051235 | maintenance of location | 0.000816687 | 0.035389787 | ATP2A1/BARD1/BCL3/CAMK2D/CD36/SCARB1/CCR7/CRY1/CYBA/GM2A/FFAR2/HNRNPU/INSIG1/JUP/NTSR1/PAFAH1B1/PDPK1/PKD1/PKD2/PLCB2/PLCB3/PLCG2/PPARD/PTPN6/PTPRC/RANGAP1/CCL21/SREBF2/TLN1/TNF/NR1H2/DYSF/DGAT1/GPAA1/ATG5/IKBKE/TOPORS/RER1/TWF2/SYNE2/CCDC22/ABHD5/SPOUT1/GET4/SUFU/TMEM38B/GOPC/TMEM38A/SLC25A23/SLC8B1/ZC3H12A/POLR2M/ALKBH7/JPH4/STARD4/SYNE3/SUN3/NRROS/NPSR1 | 59 |
| BP | GO:0048025 | negative regulation of mRNA splicing, via spliceosome | 0.000873046 | 0.03756559 | C1QBP/HNRNPA2B1/HNRNPK/SRSF7/SRSF10/U2AF2/CELF4/SRSF12 | 8 |
| BP | GO:1904589 | regulation of protein import | 0.00088411 | 0.037775593 | CD36/IFNG/JUP/IPO5/NF1/PIK3R1/TPR/HYAL2/ZPR1/TRIM28/PKIG/SUFU/NUP54/DMAP1/MAVS/ZC3H12A | 16 |
| BP | GO:0043122 | regulation of I-kappaB kinase/NF-kappaB signaling | 0.000924884 | 0.03876479 | BIRC2/BIRC3/RHOA/CD36/CD74/CHUK/CCR7/IRAK1/IRF3/LGALS9/MYD88/PDPK1/PPM1B/PRKCB/RELA/RORA/CCL21/SLC20A1/MAP3K7/TNF/TRIM25/CFLAR/SQSTM1/BTRC/IKBKE/RBCK1/NEK6/MALT1/IFIT5/CCDC22/PYCARD/TLR9/ZDHHC13/CC2D1A/RNF31/TRIM62/MAVS/ZC3H12A/SHARPIN/CARD19/TMEM106A/TIRAP/MIB2/JMJD8/SLC35B2 | 45 |
| BP | GO:0002687 | positive regulation of leukocyte migration | 0.000926294 | 0.03876479 | AIF1/RHOA/C1QBP/C5AR1/CD74/CCR7/GAS6/IL6R/ITGA4/LGALS9/MMP14/RAC1/RARRES2/CCL4/CCL5/CCL21/CCL24/ADAM17/TNF/VEGFB/ZP3/DYSF/DAPK2/PYCARD/TREM2/GPSM3/TIRAP/ANO6 | 28 |
| BP | GO:0032606 | type I interferon production | 0.000926294 | 0.03876479 | CHUK/CYLD/IRAK1/IRF3/IRF7/MYD88/NFKB2/PCBP2/PIN1/PLCG2/PPM1B/PRKDC/RELA/UBA7/TRIM25/TAX1BP1/IKBKE/FLOT1/LILRB1/DDX58/CRCP/PYCARD/TLR9/RNF125/MAVS/IFIH1/RNF26/TIRAP | 28 |
| BP | GO:0071826 | ribonucleoprotein complex subunit organization | 0.000949673 | 0.039472782 | ATM/C1QBP/EIF4B/KLC1/SNU13/NPM1/RPL5/RPL24/SRSF1/SNRPD1/SNRPD3/SNRPE/SNRPF/SRPK1/COIL/DENR/RUVBL1/EIF3A/PRPF3/SCAF11/DDX23/SART3/RBM5/SF3A1/USP39/SRSF10/PSIP1/BOP1/DICER1/SF3B1/LSM14A/PRPF31/ERAL1/ABT1/MTERF3/MRPS2/SBDS/RSL24D1/NIP7/LUC7L3/CELF4/CNOT6/PTBP2/CELF6/MRPS11/GFM2/MPV17L2/YTHDC1/TGS1/SRSF12/RPL10L/MTIF3/PATL1 | 53 |
| BP | GO:0009896 | positive regulation of catabolic process | 0.000985828 | 0.039971583 | AKT2/ATM/BARD1/PTTG1IP/PLK3/CSNK1D/GBA/GNAI3/GSK3B/HNRNPD/HSPA1B/IFNG/ATXN3/MOV10/MSN/PIK3CB/PIP4K2A/PLK1/PSMC1/RAD23A/UPF1/SGTA/SNX1/STX5/SUPT5H/TAF1/MAP3K7/TNF/TNFRSF1B/RAB7A/BAG6/EPM2A/USP5/ROCK2/GTPBP1/HERPUD1/HDAC6/BCAP31/TRIB1/ARIH2/CAMKK2/WWP2/CDC37/RAB3GAP1/ATG4B/LARP1/ARIH1/RNF19A/RCHY1/TIPARP/GIGYF2/SESN1/CCDC22/MLXIPL/ABHD5/VPS28/TREM2/ANKIB1/VPS11/SOX17/DDA1/METTL16/ZC3H12A/RNF185/OSBPL7/FAM122A/CSNK1A1L/PYHIN1/SH3D19/FLCN/DHRSX/RNF152 | 72 |
| BP | GO:0010257 | NADH dehydrogenase complex assembly | 0.000987341 | 0.039971583 | BCS1L/NDUFA5/NDUFA10/NDUFB5/NDUFB8/NDUFS4/NDUFS8/NDUFV2/NDUFV3/OXA1L/TAZ/NDUFAF4/ECSIT/NDUFB11/COA1/NDUFAF2/NDUFA11 | 17 |
| BP | GO:0032981 | mitochondrial respiratory chain complex I assembly | 0.000987341 | 0.039971583 | BCS1L/NDUFA5/NDUFA10/NDUFB5/NDUFB8/NDUFS4/NDUFS8/NDUFV2/NDUFV3/OXA1L/TAZ/NDUFAF4/ECSIT/NDUFB11/COA1/NDUFAF2/NDUFA11 | 17 |
| BP | GO:0045089 | positive regulation of innate immune response | 0.000987841 | 0.039971583 | BIRC2/BIRC3/C1QBP/CD1D/CD36/CHUK/CYBA/CYLD/FCER1G/FCN1/FFAR2/HCK/HPX/HSPA1B/ICAM2/IRAK1/IRF3/IRF7/SH2D1A/MUC1/MUC2/MYD88/PDPK1/PIK3C3/PLCG2/PRKACB/PRKDC/PSMA2/PSMA5/PSMB1/PSMB2/PSMB7/PSMC1/PSME1/NECTIN2/RELA/RPS6KA3/CCL5/SFPQ/MAP3K7/TXK/MAPKAPK3/CUL1/BTRC/PSMF1/IKBKE/PJA2/RASGRP1/PSME3/FLOT1/HEXIM1/CNPY3/MALT1/PSME4/DDX58/TKFC/LSM14A/PYCARD/TLR9/RNF125/PSPC1/MAVS/IFIH1/UNC93B1/TIRAP/PYHIN1 | 66 |
| BP | GO:0032204 | regulation of telomere maintenance | 0.001011425 | 0.040656637 | ATM/ATRX/DKC1/HNRNPA1/HNRNPA2B1/HNRNPD/HNRNPU/MAP3K4/NBN/MAP2K7/UPF1/CCT3/AURKB/CCT7/CCT8/SMG6/XRN1/NABP2/TNKS2/NEK7 | 20 |
| BP | GO:1903322 | positive regulation of protein modification by small protein conjugation or removal | 0.001028294 | 0.041064544 | BIRC2/BIRC3/PTTG1IP/CRY1/PIN1/PLK1/UBE2L3/UBE3A/SPHK1/CTR9/SART3/HDAC4/TOPORS/MALT1/KDM1A/DCUN1D4/RCHY1/TOLLIP/FANCI/WDR48/FANCM/SENP2/PHF23/ZC3H12A/RASSF5/MASTL/SPSB4/COMMD1/PEF1 | 29 |
| BP | GO:0018105 | peptidyl-serine phosphorylation | 0.001045333 | 0.041144312 | GRK2/AKT2/ARAF/ATM/CAMK2D/CCNB1/CHUK/CREBL2/CSF3/CSNK1D/CSNK1G2/EIF4G1/MARK2/GAS6/GSK3B/IFNG/MAP3K10/NCK1/PDPK1/PKD1/PLK1/PRKACB/PRKCB/PRKCH/PRKCI/PKN1/PRKDC/MAPK7/MAP2K2/RPS6KA3/STK4/TAF1/TNF/VRK2/MAPKAPK3/MKNK1/AURKB/ROCK2/IKBKE/AKT3/HDAC6/NEK6/MAP4K1/MAST3/MAST2/GPD1L/PLCL2/HIPK2/MLXIPL/VRK3/GGNBP2/MASTL/TNKS1BP1/CSNK1A1L | 54 |
| BP | GO:0031331 | positive regulation of cellular catabolic process | 0.001050493 | 0.041144312 | AKT2/ATM/PTTG1IP/PLK3/CSNK1D/GBA/GNAI3/GSK3B/HNRNPD/HSPA1B/IFNG/ATXN3/MOV10/MSN/PIK3CB/PIP4K2A/PLK1/PSMC1/RAD23A/UPF1/SGTA/SUPT5H/TAF1/MAP3K7/TNF/TNFRSF1B/BAG6/EPM2A/USP5/ROCK2/GTPBP1/HERPUD1/HDAC6/BCAP31/TRIB1/ARIH2/CAMKK2/CDC37/RAB3GAP1/LARP1/ARIH1/RNF19A/RCHY1/GIGYF2/SESN1/CCDC22/MLXIPL/ABHD5/TREM2/ANKIB1/VPS11/DDA1/METTL16/ZC3H12A/RNF185/OSBPL7/FAM122A/CSNK1A1L/PYHIN1/SH3D19/FLCN/DHRSX/RNF152 | 63 |
| BP | GO:0043687 | post-translational protein modification | 0.001050493 | 0.041144312 | CST3/GAS6/GPS1/LAMB2/MELTF/PSMA2/PSMA5/PSMB1/PSMB2/PSMB7/PSMC1/PSME1/RAB3A/RAB5A/RABGGTB/RBBP7/TIMP1/VHL/GAN/CUL1/COPS3/BTRC/BMP15/RAB11B/ATG5/PSMF1/RNF7/PSME3/CKAP4/COPS6/COPS5/WDR5/MGAT4A/PSME4/UBXN7/FBXL3/FBXO2/KLHL20/CCDC22/BTBD1/FBXW5/FBXL19/FBXL12/DCAF6/WSB2/P3H1/COPS7B/DDA1/FBXL15/DCAF10/FBXO11/KBTBD7/SPSB2/KBTBD6/SPSB3/SPSB4/ASB8/FBXL16/COMMD1/FLCN/FBXL13/KBTBD13/ASB18 | 63 |
| BP | GO:0061013 | regulation of mRNA catabolic process | 0.001062311 | 0.041342182 | EIF4G1/HNRNPD/HNRNPU/TNPO1/MOV10/MYD88/NPM1/YBX1/EXOSC9/PSMA2/PSMA5/PSMB1/PSMB2/PSMB7/PSMC1/PSME1/UPF1/SET/ROCK2/PSMF1/FXR2/GTPBP1/DHX34/PSME3/DIS3/PSME4/LARP1/EXOSC2/CARHSP1/GIGYF2/EXOSC3/NBAS/XRN1/PCID2/SECISBP2/METTL16/ZC3H14/ZC3H12A/TIRAP | 39 |
| BP | GO:0007219 | Notch signaling pathway | 0.00111756 | 0.042539792 | BCL6/BMP7/CFD/DLX1/ERH/FCER2/FOXC2/LLGL1/MFNG/MMP14/NOTCH1/NOTCH2/YBX1/PRKCI/RFNG/SNAI1/ADAM17/TBX2/HNF1B/MAML1/WWP2/SNW1/SPEN/PLXND1/POFUT1/NEPRO/SUSD5/DLL1/EPN1/ZBTB7A/SLC35C1/RBM15/APH1B/RITA1/ARRDC1/MIB2/ENHO/HES5 | 38 |
| BP | GO:0006914 | autophagy | 0.00112131 | 0.042539792 | ABL2/ANXA7/ARSB/ATM/ATP6V0B/VPS51/CAPN1/CAPNS1/CLN3/PLK3/CSNK2B/EIF4G1/MARK2/GBA/GNAI3/GSK3B/IFNG/NPC1/PIK3C3/PIK3CB/PIP4K2A/RAB5A/RHEB/SREBF2/SUPT5H/MAP3K7/FZD5/RAB7A/EPM2A/NPRL3/VAMP8/SQSTM1/HERC1/HGS/ATG5/KDM4A/TOMM20/PLEKHM1/HDAC6/RGS19/TCIRG1/RRAGB/CAMKK2/CDC37/WDR45/RAB3GAP1/ATG4B/PACS2/LARP1/ATP13A2/DAPK2/VPS41/VPS4A/SESN1/PYCARD/MTERF3/VPS28/ATP6V1H/TREM2/TOLLIP/VPS37C/EXOC1/VPS11/UBQLN4/TOMM22/VPS18/MLST8/PHF23/TBC1D17/ZC3H12A/WDR24/ATG4C/ATG4D/BMF/RNF185/OSBPL7/RAB39B/DYNLL2/EXOC8/FLCN/DHRSX/RNF152 | 82 |
| BP | GO:0061919 | process utilizing autophagic mechanism | 0.00112131 | 0.042539792 | ABL2/ANXA7/ARSB/ATM/ATP6V0B/VPS51/CAPN1/CAPNS1/CLN3/PLK3/CSNK2B/EIF4G1/MARK2/GBA/GNAI3/GSK3B/IFNG/NPC1/PIK3C3/PIK3CB/PIP4K2A/RAB5A/RHEB/SREBF2/SUPT5H/MAP3K7/FZD5/RAB7A/EPM2A/NPRL3/VAMP8/SQSTM1/HERC1/HGS/ATG5/KDM4A/TOMM20/PLEKHM1/HDAC6/RGS19/TCIRG1/RRAGB/CAMKK2/CDC37/WDR45/RAB3GAP1/ATG4B/PACS2/LARP1/ATP13A2/DAPK2/VPS41/VPS4A/SESN1/PYCARD/MTERF3/VPS28/ATP6V1H/TREM2/TOLLIP/VPS37C/EXOC1/VPS11/UBQLN4/TOMM22/VPS18/MLST8/PHF23/TBC1D17/ZC3H12A/WDR24/ATG4C/ATG4D/BMF/RNF185/OSBPL7/RAB39B/DYNLL2/EXOC8/FLCN/DHRSX/RNF152 | 82 |
| BP | GO:0033119 | negative regulation of RNA splicing | 0.001127896 | 0.042539792 | C1QBP/HNRNPA2B1/HNRNPK/SRSF7/SRSF10/U2AF2/CELF4/PTBP2/SRSF12 | 9 |
| BP | GO:0090023 | positive regulation of neutrophil chemotaxis | 0.001127896 | 0.042539792 | C1QBP/C5AR1/CD74/CCR7/RAC1/CCL21/DYSF/DAPK2/TIRAP | 9 |
| BP | GO:1902749 | regulation of cell cycle G2/M phase transition | 0.001158199 | 0.043366036 | ATM/CCNB1/CSNK1D/NBN/NPM1/PAFAH1B1/PLK1/PSMA2/PSMA5/PSMB1/PSMB2/PSMB7/PSMC1/PSME1/RAD17/RAD51B/TUBA4A/WNT10B/TUBA1A/CUL1/SSNA1/AURKB/PSMF1/PSME3/TUBB4B/DCTN2/DCTN3/PSME4/SYF2/VPS4A/GPR132/HAUS6/NDE1/USP47/RINT1/HAUS3/ATAD5/CEP76/CEP78/CCNB3/TUBB | 41 |
| BP | GO:2001252 | positive regulation of chromosome organization | 0.001163998 | 0.043366036 | ATM/ATRX/BCL6/CCNB1/DKC1/KAT2A/HNRNPA1/HNRNPA2B1/HNRNPD/HNRNPU/MAP3K4/MUC1/NBN/MAP2K7/SFPQ/TPR/CCT3/NELFE/EED/AURKB/CTR9/SART3/TRIM28/CCT7/CCT8/MTF2/SNW1/KDM1A/NIPBL/ZNF304/DMRTC2/NABP2/WDR61/TNKS2/NEK7 | 35 |
| BP | GO:0033044 | regulation of chromosome organization | 0.001195795 | 0.044280641 | ATM/ATRX/BCL6/CAMK2D/CCNB1/DKC1/KAT2A/HMGA1/HNRNPA1/HNRNPA2B1/HNRNPD/HNRNPU/MAP3K4/MTHFR/MUC1/NBN/PHF2/PLK1/MAP2K7/KDM5A/UPF1/SET/SFPQ/TPR/CCT3/NELFE/MAD1L1/EED/AURKB/PTTG1/ATG5/CTR9/SART3/SETD1A/TRIM28/CCT7/CCT8/NEK6/MTF2/SNW1/KDM1A/SMG6/EID1/NIPBL/ASF1A/SENP6/TRAPPC12/XRN1/OTUB1/PCID2/ZNF304/DMRTC2/NABP2/WDR61/TNKS2/CDCA5/NEK7/CTCFL/FLCN/GEN1 | 60 |
| BP | GO:0006354 | DNA-templated transcription, elongation | 0.001253611 | 0.045847293 | CCNH/HNRNPU/SSRP1/SUPT5H/NELFE/TAF1C/TAF1B/RNF8/CTDP1/RECQL5/CTR9/THOC1/ALYREF/SUPT16H/NELFB/AFF4/ELP3/PCID2/EAPP/POLR1E/TAF1D/WDR61/ELOF1/LEO1/TWISTNB | 25 |
| BP | GO:0032757 | positive regulation of interleukin-8 production | 0.001255328 | 0.045847293 | CD74/FCN1/FFAR2/HSPA1B/LGALS9/MYD88/TNF/HYAL2/DDX58/PYCARD/IL17D/TLR9/MAVS/TIRAP | 14 |
| BP | GO:0070498 | interleukin-1-mediated signaling pathway | 0.001260613 | 0.045847293 | CHUK/EGR1/IL1RAP/IRAK1/MYD88/PSMA2/PSMA5/PSMB1/PSMB2/PSMB7/PSMC1/PSME1/RELA/MAP3K7/VRK2/CUL1/SQSTM1/BTRC/PSMF1/ST18/PSME3/PSME4/TOLLIP | 23 |
| BP | GO:2001020 | regulation of response to DNA damage stimulus | 0.001271942 | 0.045985592 | ATM/PTTG1IP/CD74/CRY1/DDX5/HNRNPK/MGMT/MUC1/NKX3-1/OGG1/PPP4C/PRKDC/RAD51/RPA2/RPS3/SKIL/SNAI1/TPT1/WAS/DEK/RNF8/RECQL5/BCLAF1/THOC1/ACTR2/TRIM28/KDM1A/SMCHD1/ZNF385A/NSMCE4A/USP47/OTUB1/UBQLN4/RINT1/ATAD5/WDR76/SPIRE2/NACC2/PYHIN1/PPP4R2/SPRED2 | 41 |
| BP | GO:0007549 | dosage compensation | 0.001304752 | 0.046894335 | HNRNPU/UPF1/SMCHD1/RBM15B/LRIF1/PRDM14/RBM15/YTHDC1 | 8 |
| BP | GO:0032212 | positive regulation of telomere maintenance via telomerase | 0.001351639 | 0.0476941 | ATM/DKC1/HNRNPA1/MAP3K4/MAP2K7/CCT3/AURKB/CCT7/CCT8/TNKS2/NEK7 | 11 |
| BP | GO:0007077 | mitotic nuclear envelope disassembly | 0.001353494 | 0.0476941 | CCNB1/PLK1/PRKCB/NEK6/CTDNEP1/CNEP1R1 | 6 |
| BP | GO:0034244 | negative regulation of transcription elongation from RNA polymerase II promoter | 0.001353494 | 0.0476941 | HNRNPU/NELFE/RNF8/RECQL5/NELFB/EAPP | 6 |
| BP | GO:1902229 | regulation of intrinsic apoptotic signaling pathway in response to DNA damage | 0.001358228 | 0.0476941 | CD74/HNRNPK/MUC1/RPS3/SKIL/SNAI1/TPT1/KDM1A/ZNF385A/USP47/ATAD5/NACC2 | 12 |
| BP | GO:0051170 | import into nucleus | 0.001414269 | 0.048761539 | PTTG1IP/CD36/HNRNPA1/IFNG/JUP/KPNA3/TNPO1/IPO5/NF1/PIK3R1/RANBP2/SNRPD1/SNRPD3/SNRPE/SNRPF/TPR/HYAL2/ZPR1/RPL23/TRIM28/TXNIP/PKIG/SUFU/NUP54/NUP133/DMAP1/NUP107/MAVS/IPO4/ZC3H12A/NUP35/SPRN/RGPD2 | 33 |
| BP | GO:0030397 | membrane disassembly | 0.001414626 | 0.048761539 | CCNB1/PAFAH1B1/PLK1/PRKCB/NEK6/CTDNEP1/CNEP1R1 | 7 |
| BP | GO:0051081 | nuclear envelope disassembly | 0.001414626 | 0.048761539 | CCNB1/PAFAH1B1/PLK1/PRKCB/NEK6/CTDNEP1/CNEP1R1 | 7 |
| BP | GO:0050870 | positive regulation of T cell activation | 0.001420549 | 0.048761539 | AIF1/RHOA/BCL6/RUNX1/CD1D/CD47/CD74/CCR7/CYLD/EFNB1/FLOT2/IFNG/IHH/IL4R/IL6R/IL15/LGALS9/NCK1/PNP/PDPK1/PIK3R1/PTPN6/PTPRC/RAC1/RARA/RPS3/CCL5/CCL21/ZP3/TNFSF9/RASGRP1/LILRB1/MALT1/LILRB4/ZBTB1/PYCARD/SIRPG/RASAL3/CCDC88B | 39 |
| BP | GO:0048002 | antigen processing and presentation of peptide antigen | 0.001434047 | 0.048861141 | AP1B1/B2M/CAPZB/CD36/CD74/CHUK/AP2M1/AP1S1/CYBA/FCER1G/KIF2A/KLC1/PSMA2/PSMA5/PSMB1/PSMB2/PSMB7/PSMC1/PSME1/SH3GL2/TAPBP/RAB7A/VAMP8/PSMF1/BCAP31/PSME3/IFI30/DCTN2/DCTN3/PSME4/KIF4A/PYCARD/TREM2/ACTR10/KLC2/KIF2B/DYNLL2 | 37 |
| BP | GO:0048524 | positive regulation of viral process | 0.001446702 | 0.048861141 | CD74/CFL1/STOM/LGALS9/NOTCH1/PC/PPID/RAD23A/CCL5/SMARCA4/SRPK1/SUPT5H/TAF11/TOP2B/RAB7A/NELFE/CTDP1/SNW1/LARP1/NELFB/VPS4A/NUCKS1/YTHDC2/TBC1D20 | 24 |
| BP | GO:0031146 | SCF-dependent proteasomal ubiquitin-dependent protein catabolic process | 0.001447441 | 0.048861141 | PSMA2/PSMA5/PSMB1/PSMB2/PSMB7/PSMC1/PSME1/CUL1/BTRC/PSMF1/RNF7/PSME3/PSME4/FBXL3/LRRC29/FBXO2/FBXW5/FBXL12/FBXL15/FBXL16/AMN1/FBXL13 | 22 |
| BP | GO:0061008 | hepaticobiliary system development | 0.001474192 | 0.049490725 | ACO2/ARG1/ASS1/CEACAM1/CAD/CSNK2B/FPGS/HNRNPD/IHH/NF1/NOTCH1/PCK2/PHF2/PKD1/PKD2/RAP1A/RARA/RELA/TAF10/HNF1B/TGFBR3/TYMS/CFLAR/CITED2/COBL/NIPBL/SULF2/SOX17/PTCD2 | 29 |
| BP | GO:1901987 | regulation of cell cycle phase transition | 0.001553312 | 0.051647385 | AIF1/ATM/CCNB1/CDKN2B/PLK3/CSNK1D/EIF4G1/MUC1/NBN/NPM1/PAFAH1B1/PKD1/PKD2/PLK1/PRKDC/PSMA2/PSMA5/PSMB1/PSMB2/PSMB7/PSMC1/PSME1/PTPN6/RAD17/RAD51B/RBL1/RPA2/ADAM17/TAF1/TFDP2/TPR/TUBA4A/UBE2E1/WNT10B/TUBA1A/MAD1L1/CUL1/SSNA1/BTRC/AURKB/PSMF1/KNTC1/PSME3/NPM2/TUBB4B/ANAPC10/DCTN2/NEK6/DCTN3/PSME4/ZNF385A/SYF2/GIGYF2/VPS4A/TMOD3/GPR132/HAUS6/NDE1/USP47/PCID2/SUSD2/MEPCE/CNOT6/CTDSP1/SENP2/RINT1/HAUS3/ATAD5/CEP76/CEP78/CCNB3/TNKS1BP1/CDCA5/ANAPC16/PLK5/TPRA1/NACC2/TUBB/GEN1 | 79 |
| BP | GO:0060561 | apoptotic process involved in morphogenesis | 0.00157854 | 0.051647385 | BMP7/NKX2-5/FOXC2/NOTCH1/PAX2/HNF1B/TNFRSF1B/VDR/FZD5 | 9 |
| BP | GO:0022618 | ribonucleoprotein complex assembly | 0.001585459 | 0.051647385 | ATM/C1QBP/EIF4B/SNU13/NPM1/RPL5/RPL24/SRSF1/SNRPD1/SNRPD3/SNRPE/SNRPF/SRPK1/COIL/DENR/RUVBL1/EIF3A/PRPF3/SCAF11/DDX23/SART3/RBM5/SF3A1/USP39/SRSF10/PSIP1/BOP1/DICER1/SF3B1/LSM14A/PRPF31/ERAL1/ABT1/MTERF3/MRPS2/SBDS/RSL24D1/NIP7/LUC7L3/CELF4/CNOT6/PTBP2/CELF6/MRPS11/MPV17L2/YTHDC1/TGS1/SRSF12/RPL10L/PATL1 | 50 |
| BP | GO:0043488 | regulation of mRNA stability | 0.001586728 | 0.051647385 | EIF4G1/HNRNPD/HNRNPU/TNPO1/MOV10/MYD88/NPM1/YBX1/EXOSC9/PSMA2/PSMA5/PSMB1/PSMB2/PSMB7/PSMC1/PSME1/UPF1/SET/ROCK2/PSMF1/FXR2/PSME3/DIS3/PSME4/LARP1/EXOSC2/CARHSP1/GIGYF2/EXOSC3/XRN1/PCID2/METTL16/ZC3H14/ZC3H12A/TIRAP | 35 |
| BP | GO:0072332 | intrinsic apoptotic signaling pathway by p53 class mediator | 0.001587387 | 0.051647385 | BCL3/PTTG1IP/CD74/DDX5/HINT1/HNRNPK/MSH2/MUC1/PDK2/BAG6/TOPORS/SNW1/KDM1A/ZNF385A/ANKRD2/HIPK2/PYCARD/RRN3/ATAD5 | 19 |
| BP | GO:0010803 | regulation of tumor necrosis factor-mediated signaling pathway | 0.00158915 | 0.051647385 | BIRC2/BIRC3/CHUK/CYLD/GAS6/HSPA1B/ADAM17/TNF/SPHK1/TAX1BP1/RBCK1/PYCARD/RNF31/SPPL2B/SHARPIN/PYDC1 | 16 |
| BP | GO:0002698 | negative regulation of immune effector process | 0.001600168 | 0.051730305 | ARG1/BCL6/CEACAM1/C1QBP/CD47/CR1/FER/GRN/IL4R/LGALS9/PCBP2/PPM1B/PRKDC/PTPN6/PTPRC/TNF/THOC1/LILRB1/TKFC/RABGEF1/RC3H2/RNF125/SLAMF8/CUEDC2/RNF26/ZC3H12A | 26 |
| BP | GO:0010256 | endomembrane system organization | 0.001635044 | 0.052579567 | AKT2/BIN1/VPS51/CCNB1/PLK3/CSNK1D/PAFAH1B1/PIK3C3/PLK1/PRKCB/MAP2K2/PTPRC/NECTIN2/RAB3A/RAB5B/RAB27A/SGTA/SH3GL2/SOD1/STX5/RAB7A/BAG6/DYSF/BANF1/SQSTM1/SYNGR2/HGS/TRIP11/OSBPL2/SEC16A/FLOT1/NDRG1/BAIAP2/STK25/NEK6/PACSIN2/RAB3GAP1/FCHO1/DNAJC13/CTDNEP1/ZNF385A/GORASP2/VPS4A/ASAP1/TMED5/TRAPPC12/VPS28/SPTBN5/GET4/VPS37C/TMEM38B/TMEM127/VPS11/BIN3/RAB22A/VPS18/MFSD14A/TMEM38A/RNF26/VCPIP1/REEP4/ACRBP/JAGN1/MICALL1/TBC1D20/EXOC8/BHLHA15/ANO6/CNEP1R1/SUN3/RAB43/BLOC1S3/SNX19 | 73 |
| BP | GO:0032456 | endocytic recycling | 0.001658769 | 0.052786883 | ARHGAP1/VPS51/VPS52/SNX4/RAB11B/SNX17/ARL4C/ACAP2/CCDC22/CCDC93/DENND1A/DENND1C/MICALL1 | 13 |
| BP | GO:0042771 | intrinsic apoptotic signaling pathway in response to DNA damage by p53 class mediator | 0.001658769 | 0.052786883 | BCL3/CD74/HNRNPK/MSH2/MUC1/BAG6/TOPORS/SNW1/KDM1A/ZNF385A/HIPK2/PYCARD/ATAD5 | 13 |
| BP | GO:0032387 | negative regulation of intracellular transport | 0.0017085 | 0.053643247 | ARHGAP1/BARD1/CD36/INSIG1/LGALS9/NF1/RANGAP1/RAP1A/TPR/UBE2G2/PKIG/ERLEC1/RABGEF1/SNX12/SUFU/CNIH2/UBAC2 | 17 |
| BP | GO:0034243 | regulation of transcription elongation from RNA polymerase II promoter | 0.001720798 | 0.053643247 | HNRNPU/NELFE/RNF8/RECQL5/CTR9/SUPT16H/NELFB/EAPP/WDR61/LEO1 | 10 |
| BP | GO:0090022 | regulation of neutrophil chemotaxis | 0.001720798 | 0.053643247 | C1QBP/C5AR1/CD74/CCR7/RAC1/CCL21/DYSF/DAPK2/JAM3/TIRAP | 10 |
| BP | GO:1904292 | regulation of ERAD pathway | 0.001720798 | 0.053643247 | ATXN3/SGTA/UBE2G2/BAG6/HERPUD1/BCAP31/ERLEC1/USP25/RNF185/UBAC2 | 10 |
| BP | GO:0045070 | positive regulation of viral genome replication | 0.001762472 | 0.054663473 | STOM/NOTCH1/PPID/RAD23A/CCL5/SRPK1/TOP2B/LARP1/NUCKS1/YTHDC2/TBC1D20 | 11 |
| BP | GO:0044766 | multi-organism transport | 0.001798437 | 0.055218336 | KPNA3/RANBP2/DYNLT1/TPR/RAB7A/THOC1/ALYREF/NUP160/VPS28/NUP54/VPS37C/NUP133/NUP107/THOC2/THOC6/SEH1L/NUP35/NUP43 | 18 |
| BP | GO:1902579 | multi-organism localization | 0.001798437 | 0.055218336 | KPNA3/RANBP2/DYNLT1/TPR/RAB7A/THOC1/ALYREF/NUP160/VPS28/NUP54/VPS37C/NUP133/NUP107/THOC2/THOC6/SEH1L/NUP35/NUP43 | 18 |
| BP | GO:0009100 | glycoprotein metabolic process | 0.001890172 | 0.057052271 | AMFR/ARSB/ASGR1/CCR7/CST3/HBEGF/FUT1/GPC1/NDST1/IDUA/IHH/IL15/MAN1A1/MAN2A2/MFNG/MGAT3/MGAT5/MUC1/MUC2/NPC1/PPARD/RFNG/RPN2/CCL21/SGSH/ST3GAL1/ST3GAL2/UBE2G2/VEGFB/RNF103/B4GALT3/B3GALT4/DPM1/PLOD3/TRIP11/ITM2B/ITM2A/MPDU1/UST/B3GNT3/B3GNT2/MAN1A2/B4GALT7/MGAT4A/POFUT1/FBXO2/GBGT1/ST6GALNAC4/POMT2/TET2/SLC35C1/POMGNT1/NGLY1/ST6GALNAC1/SULF2/UGGT1/NECAB3/XYLT1/XYLT2/LMF1/PORCN/GNPTAB/MAGT1/B3GNT9/RNF185/TMEM106A/FUT11/KRTCAP2/GXYLT1/B3GNT8 | 70 |
| BP | GO:0060972 | left/right pattern formation | 0.00189032 | 0.057052271 | NKX2-5/NOTCH1/SNAI1/CITED2/DLL1/HSPB11/EPB41L5/ARL13B | 8 |
| BP | GO:2000810 | regulation of bicellular tight junction assembly | 0.00189032 | 0.057052271 | RUNX1/PRKCH/SNAI1/TNF/FZD5/ROCK2/GPBAR1/NPHP4 | 8 |
| BP | GO:0006220 | pyrimidine nucleotide metabolic process | 0.001909985 | 0.057052271 | CAD/DUT/ERH/NME4/OGG1/TYMS/ENTPD4/AGPAT2/NT5C/CMPK1/AGPAT4/GPAM/NEIL1/CDADC1/UCK1/GPAT4 | 16 |
| BP | GO:0002712 | regulation of B cell mediated immunity | 0.001914192 | 0.057052271 | BCL6/CR1/FCER1G/FCER2/HPX/MSH2/PTPN6/PTPRC/NECTIN2/TNF/THOC1/EXOSC3/ATAD5/APLF | 14 |
| BP | GO:0002889 | regulation of immunoglobulin mediated immune response | 0.001914192 | 0.057052271 | BCL6/CR1/FCER1G/FCER2/HPX/MSH2/PTPN6/PTPRC/NECTIN2/TNF/THOC1/EXOSC3/ATAD5/APLF | 14 |
| BP | GO:0017038 | protein import | 0.001990713 | 0.059044949 | PTTG1IP/CD36/IFNG/JUP/KPNA3/TNPO1/IPO5/NF1/PEX10/PEX13/PEX14/PIK3R1/PEX19/RANBP2/TPR/HYAL2/ZPR1/RPL23/PEX16/TOMM20/TRIM28/TXNIP/PKIG/TIMM13/SUFU/NUP54/NUP133/DMAP1/TOMM22/NUP107/MAVS/IPO4/ZC3H12A/NUP35/SPRN/DNLZ/RGPD2/TIMM23B | 38 |
| BP | GO:0002220 | innate immune response activating cell surface receptor signaling pathway | 0.00210285 | 0.061771223 | CHUK/FCER1G/FCN1/FFAR2/ICAM2/MUC1/MUC2/PDPK1/PLCG2/PRKACB/PSMA2/PSMA5/PSMB1/PSMB2/PSMB7/PSMC1/PSME1/RELA/MAP3K7/CUL1/BTRC/PSMF1/PSME3/MALT1/PSME4 | 25 |
| BP | GO:0006661 | phosphatidylinositol biosynthetic process | 0.00210285 | 0.061771223 | ATM/IMPA1/INPPL1/PIGF/PIK3C3/PIK3CB/PIK3R1/PI4KA/PIP4K2A/PLCG2/PTPN13/RAB5A/SBF1/ZP3/PIK3R3/GPAA1/DPM1/MTMR2/PIP5K1C/PIGN/SH3YL1/PIGT/VAC14/PLEKHA1/PLEKHA2 | 25 |
| BP | GO:1900182 | positive regulation of protein localization to nucleus | 0.002117777 | 0.06191206 | DKC1/IFNG/JUP/IPO5/PIK3R1/PLK1/TPR/CCT3/HYAL2/ZPR1/TRIM28/CCT7/CCT8/NMD3/DMAP1/MAVS/ZC3H12A/PYHIN1 | 18 |
| BP | GO:0001819 | positive regulation of cytokine production | 0.002148671 | 0.062334733 | AIF1/BIRC2/BIRC3/B2M/BCL3/C1QBP/C5AR1/RUNX1/TNFRSF8/CD36/CD74/CHUK/CCR7/CYBA/EGR1/FCER1G/FCN1/FFAR2/HSPA1B/IFNG/IL1RAP/IL4R/IL6R/IL15/IRAK1/IRF3/IRF7/LGALS9/MYD88/NFKB2/PIK3R1/PLCG2/PRKDC/PTGER4/PTPRC/RARA/RELA/RORA/RPS3/SOD1/ADAM17/MAP3K7/TNF/TXK/WNT11/ZP3/FZD5/HYAL2/IL18R1/SPHK1/ROCK2/RASGRP1/FLOT1/PIBF1/AGPAT2/LILRB1/MALT1/DDX58/TKFC/LSM14A/CRCP/PYCARD/IL17D/TLR9/TREM2/RNF125/SULF2/HEG1/MAVS/GPSM3/IFIH1/TIRAP/PYHIN1/NLRP7/PYDC1/CCDC88B | 76 |
| BP | GO:1904355 | positive regulation of telomere capping | 0.002160252 | 0.062334733 | HNRNPD/MAP3K4/MAP2K7/AURKB/NABP2/TNKS2/NEK7 | 7 |
| BP | GO:0071624 | positive regulation of granulocyte chemotaxis | 0.002162842 | 0.062334733 | C1QBP/C5AR1/CD74/CCR7/RAC1/CCL21/DYSF/DAPK2/TIRAP | 9 |
| BP | GO:0006415 | translational termination | 0.002184934 | 0.062675806 | MRPL49/OXA1L/UPF1/DAP3/MTRF1/ERAL1/MRPL18/N6AMT1/MRPS18C/MRPL4/MRPS2/MRPL30/MRPS11/MRPS9/MRPS6/MRPL40/MRPL38/MRPL34/MRPL1/MRPS34/GFM2/MRPL53/EIF5AL1 | 23 |
| BP | GO:0031124 | mRNA 3'-end processing | 0.002208572 | 0.062764521 | BARD1/CCNB1/MAGOH/SRSF1/SRSF7/SNRPA/SUPT5H/NELFE/CTR9/ZC3H11A/THOC1/ALYREF/U2AF2/ZC3H3/CPSF2/WDR33/THOC2/THOC6/ZC3H14/POLDIP3/LEO1/U2AF1L4 | 22 |
| BP | GO:0050764 | regulation of phagocytosis | 0.002208572 | 0.062764521 | CD36/SCARB1/CD47/CYBA/FCER1G/GAS6/HCK/IFNG/IL15/PTPRC/RAB27A/RAP1A/SOD1/TNF/DYSF/SPHK1/ATG5/PYCARD/TREM2/SIRPG/LYAR/ANO6 | 22 |
| BP | GO:0000956 | nuclear-transcribed mRNA catabolic process | 0.002253676 | 0.063611612 | ATM/DDX5/EIF4G1/MAGOH/EXOSC9/UPF1/RPL5/RPL7/RPL18A/RPL19/RPL24/RPL30/RPL28/RPL34/RPL35A/RPS3/RPS11/RPS15A/RPS21/RPS29/SSB/RPL23/DHX34/DIS3/SMG6/EXOSC2/EXOSC3/NBAS/LSM7/XRN1/PCID2/CNOT6/LSM2/UPF3A/SECISBP2/ZC3H12A/WDR61/TNKS1BP1/PATL1 | 39 |
| BP | GO:0070986 | left/right axis specification | 0.002262347 | 0.063611612 | NOTCH1/CITED2/DLL1/HSPB11/EPB41L5/ARL13B | 6 |
| BP | GO:1902622 | regulation of neutrophil migration | 0.002269612 | 0.063611612 | C1QBP/C5AR1/CD74/CCR7/RAC1/CCL21/DYSF/DAPK2/SLAMF8/JAM3/TIRAP | 11 |
| BP | GO:0031529 | ruffle organization | 0.002338146 | 0.065233196 | AIF1/CCR7/INPPL1/RAC1/CCL21/PLEKHM1/COBL/ARFIP2/FAM98A/SH3YL1/WDPCP/EPS8L1/CORO1B/PLEKHA1 | 14 |
| BP | GO:0050792 | regulation of viral process | 0.002463448 | 0.068416664 | CD74/CFL1/DDX5/STOM/FCN1/LGALS9/NOTCH1/PC/PPID/NECTIN2/RAD23A/REST/CCL4/CCL5/SMARCA4/SRPK1/SUPT5H/TAF11/DYNLT1/TNF/TOP2B/TRIM25/RAB7A/NELFE/BANF1/CTDP1/TRIM28/IFITM2/SNW1/LARP1/IFIT5/NELFB/VPS4A/TRIM62/MAVS/NUCKS1/YTHDC2/ZC3H12A/TBC1D20 | 39 |
| BP | GO:0002478 | antigen processing and presentation of exogenous peptide antigen | 0.002484673 | 0.068693888 | AP1B1/B2M/CAPZB/CD36/CD74/CHUK/AP2M1/AP1S1/CYBA/FCER1G/KIF2A/KLC1/PSMA2/PSMA5/PSMB1/PSMB2/PSMB7/PSMC1/PSME1/SH3GL2/TAPBP/RAB7A/VAMP8/PSMF1/PSME3/IFI30/DCTN2/DCTN3/PSME4/KIF4A/ACTR10/KLC2/KIF2B/DYNLL2 | 34 |
| BP | GO:0120163 | negative regulation of cold-induced thermogenesis | 0.002549409 | 0.069939108 | ALDH1A1/FOXC2/ID1/IL15/NOTCH1/RHEB/ADAM17/TFE3/NR1H2/WNT10B/IL18R1/PLCL2/FLCN | 13 |
| BP | GO:0002690 | positive regulation of leukocyte chemotaxis | 0.002552606 | 0.069939108 | AIF1/C1QBP/C5AR1/CD74/CCR7/GAS6/IL6R/LGALS9/RAC1/RARRES2/CCL4/CCL5/CCL21/ADAM17/VEGFB/DYSF/DAPK2/GPSM3/TIRAP/ANO6 | 20 |
| BP | GO:0019884 | antigen processing and presentation of exogenous antigen | 0.002588975 | 0.070618922 | AP1B1/B2M/CAPZB/CD1D/CD36/CD74/CHUK/AP2M1/AP1S1/CYBA/FCER1G/KIF2A/KLC1/PSMA2/PSMA5/PSMB1/PSMB2/PSMB7/PSMC1/PSME1/SH3GL2/TAPBP/RAB7A/VAMP8/PSMF1/PSME3/IFI30/DCTN2/DCTN3/PSME4/KIF4A/ACTR10/KLC2/KIF2B/DYNLL2 | 35 |
| BP | GO:0140112 | extracellular vesicle biogenesis | 0.002664723 | 0.072362035 | IFNG/RAB27A/RAB7A/HGS/COPS5/ATP13A2/VPS4A/ARRDC1 | 8 |
| BP | GO:0002758 | innate immune response-activating signal transduction | 0.002738335 | 0.074031966 | BIRC2/BIRC3/C1QBP/CD36/CHUK/CYBA/CYLD/FCER1G/FCN1/FFAR2/HCK/HSPA1B/ICAM2/IRAK1/IRF3/IRF7/MUC1/MUC2/MYD88/PDPK1/PIK3C3/PLCG2/PRKACB/PSMA2/PSMA5/PSMB1/PSMB2/PSMB7/PSMC1/PSME1/RELA/RPS6KA3/MAP3K7/MAPKAPK3/CUL1/BTRC/PSMF1/IKBKE/PJA2/PSME3/FLOT1/CNPY3/MALT1/PSME4/DDX58/TKFC/LSM14A/TLR9/RNF125/IFIH1/UNC93B1/TIRAP | 52 |
| BP | GO:0018205 | peptidyl-lysine modification | 0.00282148 | 0.075802265 | ATRX/DHPS/EGR1/KAT2A/MUC1/MYOD1/PLOD1/POR/RANBP2/RANGAP1/RELA/SET/STX1A/TAF1/TAF5/TAF10/MAP3K7/TPR/PCGF2/BRPF1/BAG6/NELFE/RUVBL1/EED/PLOD3/ATG5/CTR9/SETD1A/HDAC4/HDAC6/SAE1/TRIM28/TOPORS/P3H3/WDR5/MTF2/SNW1/KDM1A/NUP160/EID1/SENP6/BRPF3/CXXC1/KMT5B/NUP54/TOLLIP/TET2/ELP3/MSL2/NUP133/DMAP1/NUP107/ZNF304/KIAA1586/SENP2/DMRTC2/IFIH1/ATAT1/WDR61/SEH1L/HINT2/TADA1/NUP35/CTCFL/FLCN/NUP43 | 66 |
| BP | GO:0050766 | positive regulation of phagocytosis | 0.002828628 | 0.075802265 | CD36/CD47/CYBA/FCER1G/GAS6/IFNG/IL15/PTPRC/RAB27A/RAP1A/SOD1/TNF/PYCARD/TREM2/SIRPG/LYAR/ANO6 | 17 |
| BP | GO:0042307 | positive regulation of protein import into nucleus | 0.002888752 | 0.076831212 | IFNG/JUP/IPO5/PIK3R1/TPR/HYAL2/ZPR1/TRIM28/DMAP1/MAVS/ZC3H12A | 11 |
| BP | GO:1901264 | carbohydrate derivative transport | 0.002900285 | 0.076831212 | SLC25A6/SCARB1/CYBA/SLC37A4/GUK1/VAMP8/SLC33A1/ATG5/SLC35D2/SLC17A5/SLC37A1/SYTL2/SLC35A5/SLC35C1/SLC25A23/RFT1/G6PC3/SLC35B2 | 18 |
| BP | GO:0000460 | maturation of 5.8S rRNA | 0.00290697 | 0.076831212 | EXOSC9/RPS21/NOP14/RCL1/BOP1/EXOSC2/PES1/ABT1/EXOSC3 | 9 |
| BP | GO:0045621 | positive regulation of lymphocyte differentiation | 0.002923957 | 0.076831212 | RHOA/BCL6/RUNX1/CD74/CYLD/GAS6/IFNG/IHH/IL4R/IL15/LGALS9/MMP14/PNP/PTPRC/RARA/TNFSF9/RASGRP1/MALT1/LILRB4/ZBTB1/PCID2 | 21 |
| BP | GO:0070646 | protein modification by small protein removal | 0.002941675 | 0.076831212 | ACTB/BIRC2/BIRC3/RHOA/BARD1/CYLD/KAT2A/GPS1/ATXN3/PSMA2/PSMA5/PSMB1/PSMB2/PSMB7/PSMC1/PSME1/RAD23A/SIAH2/TAF10/MAP3K7/USP5/USP9X/BAP1/COPS3/RUVBL1/HGS/PSMF1/SART3/TOMM20/USP15/PSME3/USP39/COPS6/COPS5/PSME4/DDX58/SENP6/USP25/TFPT/USP53/INO80D/USP47/OTUB1/WDR48/SENP2/IFIH1/COPS7B/VCPIP1/ZC3H12A/USP38/MBD6/JOSD2 | 52 |
| BP | GO:0070125 | mitochondrial translational elongation | 0.002942472 | 0.076831212 | MRPL49/OXA1L/TUFM/DAP3/ERAL1/MRPL18/MRPS18C/MRPL4/MRPS2/MRPL30/MRPS11/MRPS9/MRPS6/MRPL40/MRPL38/MRPL34/MRPL1/MRPS34/GFM1/MRPL53 | 20 |
| BP | GO:0043547 | positive regulation of GTPase activity | 0.002974667 | 0.07701363 | AKT2/ALDH1A1/ARHGAP1/ARHGAP4/CHN1/CCR7/DVL3/GSK3B/LLGL1/MYO9A/MYO9B/NF1/PIN1/PLXNB1/RANBP2/RANGAP1/RAP1A/RAP1GDS1/RGS10/CCL4/CCL5/CCL21/CCL24/CDKL5/WNT11/NPRL3/RANBP3/RGS9/RABEP1/ARHGEF1/ARHGEF11/SGSM2/RABGAP1L/RASGRP1/VAV3/RGS14/FZD10/RAB3GAP1/TBC1D9B/TBC1D2B/ACAP2/RABGAP1/GAPVD1/ASAP1/TBC1D13/ARHGAP17/PLEKHG6/ADAP2/ZC3H15/RALGAPB/DENND1A/ARHGAP22/RIC8A/ARAP3/RASAL3/TBC1D17/GRTP1/ARHGAP33/EVI5L/ACAP3/AGAP3/TBC1D20/STXBP5/FLCN/ARHGAP30/CCL4L1/RGPD2 | 67 |
| BP | GO:0043900 | regulation of multi-organism process | 0.002974667 | 0.07701363 | BIRC2/BIRC3/ARG1/C1QBP/CD36/CD74/CFL1/CYBA/DDX5/STOM/FCER2/FCN1/GRN/IFNG/IL15/LGALS9/NOTCH1/PC/PCBP2/PPID/PPM1B/NECTIN2/RAD23A/REST/CCL4/CCL5/SMARCA4/SRPK1/SUPT5H/TAF11/DYNLT1/TIMP1/TNF/TOP2B/TRIM25/ZP3/RAB7A/NELFE/BANF1/CACNA1H/CTDP1/HDAC4/TSPAN32/TRIM28/TRIB1/IFITM2/LILRB1/SNW1/LARP1/DDX58/IFIT5/NELFB/TKFC/VPS4A/PYCARD/RNF125/TRIM62/CCDC87/MAVS/SIGIRR/FAM3A/NUCKS1/YTHDC2/RNF26/ZC3H12A/TBC1D20/FAM170B | 67 |
| BP | GO:0043624 | cellular protein complex disassembly | 0.003002823 | 0.077414547 | ADD2/MRPL49/CAPG/CAPZB/CFL1/KIF2A/OXA1L/PEX14/UPF1/SH3GL2/DAP3/NAPA/MTRF1/HDAC6/KATNB1/TRIOBP/TWF2/ERAL1/VPS4A/MRPL18/N6AMT1/TMOD3/MRPS18C/MRPL4/MRPS2/MRPL30/SPTBN5/MID1IP1/MRPS11/MRPS9/MRPS6/MRPL40/MRPL38/MRPL34/MRPL1/MRPS34/GFM2/KIF2B/MRPL53/EIF5AL1 | 40 |
| BP | GO:0072604 | interleukin-6 secretion | 0.003123102 | 0.080177109 | AIF1/GAS6/IL1RAP/LGALS9/TNF/HYAL2/DDX58/RABGEF1/PYCARD/MAVS/IFIH1/ZC3H12A/TMEM106A | 13 |
| BP | GO:2001233 | regulation of apoptotic signaling pathway | 0.003159724 | 0.080777884 | PTTG1IP/CD74/CTSH/CYLD/GCLM/GNAI3/GSK3B/HNRNPK/HSPA1B/LGALS9/MAZ/MNT/MUC1/NCK1/NF1/NKX3-1/PLAUR/PPP1CA/PPP3CC/PPP3R1/MAPK7/PTPRC/RELA/RPS3/SFPQ/SIAH1/SIAH2/SKIL/SNAI1/SOD1/STK4/TFDP2/TIMP3/TNF/TPT1/VDAC2/PCGF2/HYAL2/CFLAR/SLC9A3R1/ST18/HERPUD1/BCLAF1/TRAP1/BCAP31/PSME3/RBCK1/IVNS1ABP/KDM1A/DAPK2/ZNF385A/HIGD1A/ANKRD2/BBC3/CIDEB/PYCARD/RRN3/SLC35F6/USP47/ATAD5/RNF34/ITPRIP/BMF/NACC2/DEDD2/FLCN/CHCHD10 | 67 |
| BP | GO:0050854 | regulation of antigen receptor-mediated signaling pathway | 0.003212654 | 0.081788809 | CEACAM1/RUNX1/CCR7/CYLD/PRKCB/PRKCH/PTPN6/PTPRC/NECTIN2/RELA/RPS3/MALT1/LILRB4/PLCL2/PHPT1/GCSAML | 16 |
| BP | GO:0018107 | peptidyl-threonine phosphorylation | 0.003274946 | 0.083028704 | GRK2/BMP7/CAD/CAMK2D/CSNK1D/CSNK1G2/CSNK2B/EIF4G1/MARK2/GSK3B/MAP3K10/PDPK1/PLK1/PPP2R5D/PRKCB/PKN1/TAF1/VRK2/SPHK1/ROCK2/DCAF1/HIPK2/VRK3/TNKS1BP1/CSNK1A1L/SPRED2 | 26 |
| BP | GO:0050821 | protein stabilization | 0.003306232 | 0.083475526 | CCNH/CREBL2/DVL3/FLOT2/GRN/HIP1/HSPA1B/PIM1/PIK3R1/PIN1/PEX19/RPL5/STK4/TAF1/CCT3/VHL/WNT10B/BAG6/USP9X/RPL23/SEC16A/FLOT1/CCT7/CCT8/CDC37/CDC37L1/NCLN/P3H1/SOX17/NAA16/MCM8/TMEM88/PYHIN1/DNLZ | 34 |
| BP | GO:0070126 | mitochondrial translational termination | 0.003380958 | 0.085010928 | MRPL49/OXA1L/DAP3/MTRF1/ERAL1/MRPL18/MRPS18C/MRPL4/MRPS2/MRPL30/MRPS11/MRPS9/MRPS6/MRPL40/MRPL38/MRPL34/MRPL1/MRPS34/GFM2/MRPL53 | 20 |
| BP | GO:0032210 | regulation of telomere maintenance via telomerase | 0.00341895 | 0.085613876 | ATM/DKC1/HNRNPA1/HNRNPU/MAP3K4/MAP2K7/CCT3/AURKB/CCT7/CCT8/SMG6/XRN1/TNKS2/NEK7 | 14 |
| BP | GO:0000338 | protein deneddylation | 0.003521564 | 0.085724117 | GPS1/COPS3/COPS6/COPS5/COPS7B | 5 |
| BP | GO:0034058 | endosomal vesicle fusion | 0.003521564 | 0.085724117 | SPHK1/VPS41/VPS4A/SAMD9/VPS11 | 5 |
| BP | GO:0039530 | MDA-5 signaling pathway | 0.003521564 | 0.085724117 | C1QBP/IRF3/IRF7/TKFC/IFIH1 | 5 |
| BP | GO:0051593 | response to folic acid | 0.003521564 | 0.085724117 | EEF2/MGMT/MTHFR/OGG1/TYMS | 5 |
| BP | GO:0072641 | type I interferon secretion | 0.003521564 | 0.085724117 | CHUK/LILRB1/DDX58/MAVS/IFIH1 | 5 |
| BP | GO:0097048 | dendritic cell apoptotic process | 0.003521564 | 0.085724117 | CCR7/GAS6/LGALS9/CCL21/LILRB1 | 5 |
| BP | GO:2000668 | regulation of dendritic cell apoptotic process | 0.003521564 | 0.085724117 | CCR7/GAS6/LGALS9/CCL21/LILRB1 | 5 |
| BP | GO:0006268 | DNA unwinding involved in DNA replication | 0.003564369 | 0.086080209 | HMGA1/MCM6/PURA/RAD51/RECQL/RECQL5 | 6 |
| BP | GO:0006999 | nuclear pore organization | 0.003564369 | 0.086080209 | TPR/NUP54/NUP133/NUP107/SEH1L/NUP35 | 6 |
| BP | GO:2001235 | positive regulation of apoptotic signaling pathway | 0.003627159 | 0.08725173 | CTSH/CYLD/GSK3B/LGALS9/NCK1/NF1/NKX3-1/PLAUR/PPP1CA/PPP3CC/PPP3R1/PTPRC/RPS3/SFPQ/SIAH1/SKIL/SOD1/STK4/TFDP2/TIMP3/HYAL2/SLC9A3R1/ST18/BCLAF1/BCAP31/RBCK1/BBC3/CIDEB/PYCARD/BMF/NACC2/DEDD2/FLCN/CHCHD10 | 34 |
| BP | GO:0062012 | regulation of small molecule metabolic process | 0.003673109 | 0.088010575 | AKT2/RHOA/CEACAM1/CCNB1/CD74/CLK2/CRY1/DHCR7/EGR1/FASN/FGFR4/KAT2A/GSK3B/IFNG/INSIG1/NFE2L1/NTSR1/PDK2/POR/PPP1CA/PSMA2/PSMA5/PSMB1/PSMB2/PSMB7/PSMC1/PSME1/RANBP2/REST/RORA/SNAI1/SOD1/SREBF2/TAZ/TM7SF2/TNF/TPR/NR1H2/VDR/PSMF1/HDAC4/PSME3/PIBF1/WDR5/SCAP/PSME4/NUP160/ISCU/LDLRAP1/MLXIPL/ZBTB7A/AZIN1/NUP54/TREM2/PDP1/NUP133/NUP107/GPAM/MID1IP1/FAM3A/LMF1/ELOVL6/SLC25A23/ADIPOR2/PPP1R3B/SEH1L/MIDN/NUP35/STARD4/CLYBL/FLCN/TYSND1/JMJD8/NUP43 | 74 |
| BP | GO:0051098 | regulation of binding | 0.003723822 | 0.088877166 | ACTB/ADD2/AMFR/B2M/BCL3/CD36/CRMP1/CSF3/CSNK2B/CYLD/EIF4G1/MARK2/GSK3B/GZMA/ID1/IFIT2/IFNG/ITGA4/MFNG/NKX3-1/PEX14/PIN1/PKD1/PLAUR/PLK1/PPP1CA/PEX19/RARA/RFNG/STK4/TAF1/TAF10/TGFBR3/EDF1/BTAF1/AURKB/HDAC4/TRIM28/FLOT1/KDM1A/PLXND1/PLCL2/MAU2/NIPBL/LDLRAP1/HIPK2/NMD3/ZBTB7A/BTBD1/LARP6/MEPCE/CTNNBIP1/ZNF304/EPB41L5/SENP2/NUCKS1/AIDA/MED25/CDCA5/TIRAP/PYHIN1/ENHO | 62 |
| BP | GO:0006261 | DNA-dependent DNA replication | 0.003741124 | 0.088942679 | ATRX/BCL6/CDC34/HMGA1/LIG1/LIG3/MCM6/NBN/ORC2/ORC4/POLD1/PURA/RAD51/RECQL/UPF1/RFC3/RFC5/RPA2/ZPR1/RECQL5/THOC1/ALYREF/WDHD1/RPA4/FANCM/SENP2/NUCKS1/ATAD5/MMS22L/GEN1 | 30 |
| BP | GO:0051091 | positive regulation of DNA-binding transcription factor activity | 0.003820563 | 0.090479235 | CD36/CHUK/CSF3/FER/FLOT2/HSPA1B/IL1RAP/IRAK1/JUP/LGALS9/TRIM37/MYD88/NFKB2/NKX3-1/NPM1/PRKCB/PRKCH/PRKCI/RELA/RPS3/SMARCA4/TAF1/MAP3K7/TNF/WNT10B/TRIM25/FOSL1/IL18R1/CFLAR/SPHK1/HDAC4/FLOT1/RBCK1/MALT1/COPS5/KDM1A/CRTC1/DDX58/HIPK2/PYCARD/ZBTB7A/TLR9/RNF31/TRIM62/MAVS/TIRAP | 46 |
| BP | GO:0031440 | regulation of mRNA 3'-end processing | 0.00383929 | 0.090571676 | BARD1/CCNB1/SNRPA/SUPT5H/NELFE/CTR9/ZC3H3/ZC3H14/LEO1 | 9 |
| BP | GO:1903829 | positive regulation of cellular protein localization | 0.003871127 | 0.09062296 | AKT2/CACNB3/PLK3/CYLD/DKC1/STOM/FCER1G/GAS6/GSK3B/IFNG/JUP/IPO5/MGAT3/MSN/PDPK1/PIK3R1/PLK1/PPP3CC/PPP3R1/PRKCH/PRKCI/SREBF2/TFDP2/TNF/TPR/CCT3/UBE2L3/FZD5/BAP1/HYAL2/SQSTM1/ZPR1/ROCK2/TCAF1/SEC16A/SAE1/BCAP31/TRIM28/ARIH2/CCT7/CCT8/RER1/GPD1L/NIPBL/BBC3/NMD3/TRAPPC12/VPS28/TREM2/RNF31/VPS11/DMAP1/MAVS/ZC3H12A/PYHIN1 | 55 |
| BP | GO:0002532 | production of molecular mediator involved in inflammatory response | 0.003871128 | 0.09062296 | CD36/FCER1G/GRN/IL4R/MYD88/P2RX1/BAP1/VAMP8/SNX4/PYCARD/IL17D/SLAMF8/GPSM3/CUEDC2/ZC3H12A/SEH1L/NLRP7 | 17 |
| BP | GO:0002718 | regulation of cytokine production involved in immune response | 0.003907736 | 0.090903328 | ARG1/B2M/BCL6/CD36/CD74/CLC/FCER1G/FFAR2/MAP3K7/TNF/TNFRSF1B/FZD5/IL18R1/ATG5/LILRB1/MALT1/DDX58/MAVS/CUEDC2 | 19 |
| BP | GO:1903305 | regulation of regulated secretory pathway | 0.00391286 | 0.090903328 | CEACAM1/FCER1G/FER/FES/GSK3B/IL4R/LGALS9/NOTCH1/P2RX1/P2RY4/PDPK1/PRKCB/RAB3A/RAB5A/RAB27A/RAP1A/REST/STX1A/SYT5/ZP3/DOC2A/VAMP8/SNX4/NAPA/CACNA1H/CDK5R2/GIPC1/RAB3GAP1/RABGEF1/TRPV6/VPS18 | 31 |
| BP | GO:1901657 | glycosyl compound metabolic process | 0.003939401 | 0.091173262 | AMD1/AMPD3/RHOA/CAD/ERH/GBA/GNAI3/GUK1/IMPDH2/NAGA/NME4/PNP/PPAT/GMPS/GTPBP1/ENTPD4/PEMT/MACROD1/NT5C/DERA/GMPR2/CMPK1/NUDT18/CDADC1/UCK1/MRI1/CBR4/TYW3/GIMAP7 | 29 |
| BP | GO:0038093 | Fc receptor signaling pathway | 0.004014548 | 0.092561836 | ACTB/CD47/CHUK/FCER1G/FCGR3A/FER/HCK/LCP2/LIMK1/NCK1/PDPK1/PIGR/PIK3CB/PIK3R1/PLCG2/PPP3R1/MAP2K7/PSMA2/PSMA5/PSMB1/PSMB2/PSMB7/PSMC1/PSME1/PTPRC/RAC1/RAP1A/RELA/SHC1/MAP3K7/WAS/CUL1/BTRC/PSMF1/ACTR2/PSME3/VAV3/BAIAP2/MALT1/PSME4/ELMO2/MYO1G/WIPF2 | 43 |
| BP | GO:0033209 | tumor necrosis factor-mediated signaling pathway | 0.004071259 | 0.093516516 | BIRC2/BIRC3/TNFRSF8/CHUK/CYLD/GAS6/HSPA1B/KRT8/PSMA2/PSMA5/PSMB1/PSMB2/PSMB7/PSMC1/PSME1/RELA/ADAM17/TNF/TNFRSF1B/TNFSF9/SPHK1/TAX1BP1/PSMF1/ST18/PSME3/RBCK1/PSME4/PYCARD/RNF31/SPPL2B/SHARPIN/PYDC1 | 32 |
| BP | GO:0051090 | regulation of DNA-binding transcription factor activity | 0.004092145 | 0.093644216 | BMP7/CD36/CHUK/CSF3/CYLD/FER/FLOT2/GAS6/HCK/HSPA1B/ID1/IL1RAP/IRAK1/JUP/LGALS9/MAP3K10/TRIM37/MYD88/NFKB2/NKX3-1/NPM1/PEX14/PIM1/PKD1/PKD2/PRKCB/PRKCH/PRKCI/KDM5A/RELA/RPS3/SMARCA4/TAF1/MAP3K7/TNF/WNT10B/TRIM25/FOSL1/IL18R1/CFLAR/SPHK1/TAX1BP1/BTRC/HDAC4/FLOT1/TRIB1/RBCK1/MALT1/COPS5/WWP2/KDM1A/CRTC1/UFL1/DDX58/CCDC22/HIPK2/PYCARD/ZBTB7A/SUFU/TLR9/RNF31/TRIM62/CTNNBIP1/MAVS/CREBZF/SIGIRR/ZC3H12A/TIRAP/COMMD1/PYDC1 | 70 |
| BP | GO:0007249 | I-kappaB kinase/NF-kappaB signaling | 0.004135626 | 0.094169352 | BIRC2/BIRC3/RHOA/BCL3/CD36/CD74/CHUK/CCR7/IRAK1/IRF3/LGALS9/MYD88/PDPK1/PPM1B/PRKCB/RELA/RORA/CCL21/SLC20A1/MAP3K7/TNF/TRIM25/CFLAR/SQSTM1/BTRC/ROCK2/IKBKE/RBCK1/NEK6/MALT1/IFIT5/CCDC22/PYCARD/TLR9/ZDHHC13/CC2D1A/RNF31/TRIM62/MAVS/ZC3H12A/SHARPIN/CARD19/TMEM106A/TIRAP/MIB2/JMJD8/SLC35B2 | 47 |
| BP | GO:0016570 | histone modification | 0.004158323 | 0.094169352 | ATM/ATRX/BCL6/CAMK2D/CCNB1/PHC1/KAT2A/HSF4/MTHFR/MUC1/TRIM37/MYOD1/PHF2/PRKCB/PKN1/KDM5A/REST/RING1/SET/SFPQ/TAF1/TAF5/TAF10/MAP3K7/UBE2E1/PCGF2/BRPF1/NELFE/KDM5C/BAP1/RUVBL1/EED/RNF8/AURKB/ATG5/CTR9/KDM4A/DCAF1/SART3/SETD1A/HDAC4/USP15/HDAC6/WDR5/MTF2/SNW1/KDM1A/KDM6B/SIN3B/PADI4/EID1/NIPBL/BRPF3/UHRF1/CXXC1/KMT5B/HDAC7/PADI3/TET2/ELP3/MSL2/OTUB1/DMAP1/ZNF304/DMRTC2/PRDM14/TBL1XR1/WDR61/TADA1/LEO1/NACC2/CTCFL/FLCN | 73 |
| BP | GO:1903037 | regulation of leukocyte cell-cell adhesion | 0.004166318 | 0.094169352 | AIF1/ARG1/RHOA/ASS1/BCL6/CEACAM1/RUNX1/CD1D/CD47/CD74/CCR7/CYLD/EFNB1/ETS1/FLOT2/GNRH1/IFNG/IHH/IL4R/IL6R/IL15/IRAK1/ITGA4/LGALS9/NCK1/PNP/PDPK1/PIK3R1/PTPN6/PTPRC/RAC1/RARA/RELA/RPS3/CCL5/CCL21/TNF/ZP3/MAD1L1/TNFSF9/RASGRP1/LILRB1/MALT1/LILRB4/ZBTB1/PYCARD/RC3H2/LAX1/SIRPG/RASAL3/ZC3H12A/CCDC88B | 52 |
| BP | GO:0071622 | regulation of granulocyte chemotaxis | 0.004176742 | 0.094169352 | C1QBP/C5AR1/CD74/CCR7/RAC1/RARRES2/CCL5/CCL21/DYSF/DAPK2/JAM3/TIRAP | 12 |
| BP | GO:1902115 | regulation of organelle assembly | 0.004200271 | 0.094199331 | RHOA/CYLD/KAT2A/HCK/HNRNPU/HSPA1B/IL1RAP/MSN/TRIM37/NPM1/PIP4K2A/PLK1/RAB5A/CDKL5/TNF/TPR/VDAC3/NPRL3/ATG5/STAG1/SPAG5/RAB3GAP1/SYNE2/SENP6/ASAP1/TRAPPC12/ZMYND10/VPS11/CNOT6/ODF2L/PHF23/CEP76/CEP295/EVI5L/CNTROB/ADAMTS16 | 36 |
| BP | GO:0009123 | nucleoside monophosphate metabolic process | 0.004208906 | 0.094199331 | ALDOA/AMPD2/AMPD3/RHOA/CAD/CCNB1/COX7B/COX7C/DLD/DUT/GALK1/GART/GUK1/HSPA1B/IFNG/IMPDH2/LDHA/MSH2/NDUFA4/NDUFA5/NDUFA10/NDUFB5/NDUFB8/NDUFS4/NDUFS8/NDUFV2/NDUFV3/PFKL/PPAT/RANBP2/TAZ/TPR/TYMS/GMPS/HDAC4/SLC25A13/CLPX/NUP160/ISCU/UQCRQ/MLXIPL/GMPR2/ZBTB7A/CMPK1/NUP54/TREM2/NDUFB11/NUP133/OGDHL/NUP107/LHPP/SLC25A23/CDADC1/SEH1L/UCK1/NDUFA11/NUP35/FLCN/JMJD8/NUP43/CHCHD10/AK6 | 62 |
| BP | GO:0010948 | negative regulation of cell cycle process | 0.004279389 | 0.095257826 | ATM/ATRX/BCL6/BMP7/CCNB1/CDKN2B/PLK3/E2F6/PHC1/KAT2A/MUC1/TRIM37/NBN/NPM1/PKD2/PLK1/PRKDC/PSMA2/PSMA5/PSMB1/PSMB2/PSMB7/PSMC1/PSME1/RAD1/RAD17/RAD51/RBBP7/RBL1/RING1/RPA2/TFDP2/TPR/PCGF2/MAD1L1/CUL1/EED/AURKB/PTTG1/RPL23/PSMF1/PSME3/PSME4/ZNF385A/SYF2/GIGYF2/VPS4A/GPR132/MLXIPL/USP47/PCID2/SUSD2/CNOT6/CTDSP1/RINT1/TNKS1BP1/TPRA1/NACC2/GEN1/DUX4 | 60 |
| BP | GO:0046777 | protein autophosphorylation | 0.004290877 | 0.095257826 | ABL2/ATM/CAD/CAMK2D/CLK2/CSNK1G2/MARK2/EPHB4/FER/FES/FGFR4/GSK3B/HCK/IRAK1/MAP3K10/MAP3K11/NBN/PDPK1/PIM1/PPP2R5D/MAP2K2/PTPRC/STK4/CDKL5/TAF1/TXK/VRK2/MAPKAPK3/MKNK1/TNK1/AURKB/TRIM28/STK25/CAMKK2/NEK6/MAP4K1/ATP13A2/DAPK2/STK26/TRPM7/TNKS1BP1/PIM3 | 42 |
| BP | GO:1903902 | positive regulation of viral life cycle | 0.004302972 | 0.095257826 | CD74/STOM/LGALS9/NOTCH1/PC/PPID/RAD23A/CCL5/SRPK1/TOP2B/LARP1/VPS4A/NUCKS1/YTHDC2/TBC1D20 | 15 |
| BP | GO:0001889 | liver development | 0.004349337 | 0.095484864 | ACO2/ARG1/ASS1/CEACAM1/CAD/CSNK2B/FPGS/HNRNPD/IHH/NF1/NOTCH1/PCK2/PHF2/PKD1/PKD2/RAP1A/RARA/RELA/TAF10/HNF1B/TGFBR3/TYMS/CFLAR/CITED2/COBL/SULF2/PTCD2 | 27 |
| BP | GO:0042274 | ribosomal small subunit biogenesis | 0.004433778 | 0.095484864 | NPM1/RPS21/NOP14/BTRC/RCL1/NOL11/ERAL1/ABT1/TSR1/MRPS11/MRPS9/UTP23/FAM207A/RRP36/TSR2/TSR3 | 16 |
| BP | GO:2000573 | positive regulation of DNA biosynthetic process | 0.004433778 | 0.095484864 | ATM/DKC1/FGFR4/HNRNPA1/HNRNPA2B1/HNRNPD/MAP3K4/MAP2K7/RFC3/RFC5/CCT3/AURKB/CCT7/CCT8/TNKS2/NEK7 | 16 |
| BP | GO:0034612 | response to tumor necrosis factor | 0.004446946 | 0.095484864 | BIRC2/BIRC3/ASS1/TNFRSF8/CHUK/CYBA/CYLD/GAS6/GBA/KAT2A/GSS/HSPA1B/KRT8/MYOD1/NKX3-1/MAP2K7/PSMA2/PSMA5/PSMB1/PSMB2/PSMB7/PSMC1/PSME1/RELA/RORA/RPS3/CCL4/CCL5/CCL21/CCL24/ADAM17/TNF/TNFRSF1B/HYAL2/TNFSF9/SPHK1/TAX1BP1/PSMF1/ST18/HDAC4/PSME3/RBCK1/ADAMTS7/PSME4/PYCARD/RNF31/SMPD4/SPPL2B/YTHDC2/ZC3H12A/SHARPIN/PYDC1/CCL4L1 | 53 |
| BP | GO:0032388 | positive regulation of intracellular transport | 0.004460179 | 0.095484864 | AKT2/ATP2A1/CACNB3/PLK3/STOM/FCER1G/GAS6/GSK3B/IFNG/IL4R/JUP/IPO5/MSN/PIK3R1/SREBF2/TPR/UBE2L3/FZD5/BAP1/VAMP8/HYAL2/SNX4/ZPR1/MTMR2/TCAF1/SEC16A/SAE1/BCAP31/TRIM28/ARIH2/SPAG5/LDLRAP1/RNF31/VPS11/DMAP1/MAVS/TRIM46/ZC3H12A/TBC1D20 | 39 |
| BP | GO:0071356 | cellular response to tumor necrosis factor | 0.00446716 | 0.095484864 | BIRC2/BIRC3/ASS1/TNFRSF8/CHUK/CYBA/CYLD/GAS6/GBA/KAT2A/HSPA1B/KRT8/MYOD1/NKX3-1/PSMA2/PSMA5/PSMB1/PSMB2/PSMB7/PSMC1/PSME1/RELA/RORA/RPS3/CCL4/CCL5/CCL21/CCL24/ADAM17/TNF/TNFRSF1B/HYAL2/TNFSF9/SPHK1/TAX1BP1/PSMF1/ST18/HDAC4/PSME3/RBCK1/ADAMTS7/PSME4/PYCARD/RNF31/SMPD4/SPPL2B/ZC3H12A/SHARPIN/PYDC1/CCL4L1 | 50 |
| BP | GO:0043902 | positive regulation of multi-organism process | 0.004469174 | 0.095484864 | ARG1/C1QBP/CD74/CFL1/CYBA/STOM/FCER2/GRN/IFNG/LGALS9/NOTCH1/PC/PPID/RAD23A/CCL5/SMARCA4/SRPK1/SUPT5H/TAF11/TOP2B/ZP3/RAB7A/NELFE/CACNA1H/CTDP1/HDAC4/SNW1/LARP1/NELFB/VPS4A/CCDC87/NUCKS1/YTHDC2/TBC1D20/FAM170B | 35 |
| BP | GO:1901532 | regulation of hematopoietic progenitor cell differentiation | 0.004485197 | 0.095484864 | RUNX1/HSPA9/LMO2/NOTCH1/PSMA2/PSMA5/PSMB1/PSMB2/PSMB7/PSMC1/PSME1/PSMF1/SETD1A/PSME3/N4BP2L2/ZBTB1/PSME4/FLCN/HES5 | 19 |
| BP | GO:0035690 | cellular response to drug | 0.004512165 | 0.095484864 | ACTB/ADCY3/GRK2/AIF1/ARG1/ASS1/ATRX/B2M/CAD/CYBA/DAXX/EGR1/EIF4EBP1/ETS1/FDX1/GABPA/GAS6/GCLM/NR3C1/HNRNPA1/HNRNPD/ID1/JUP/KCNQ1/NKX3-1/P2RY4/PAX2/PCK2/PDE4A/PPAT/MAPK7/PYCR1/RAD51/RAP1A/RELA/REST/RGS10/RPS3/SOD1/TAF1/TNF/PCGF2/CFLAR/SPHK1/RECQL5/ROCK2/HDAC6/TRAP1/BAIAP2/STK25/MAP4K1/KDM6B/LARP1/STK26/XRN1/TMEM38B/SLAMF8/PLEKHA1/TMEM38A/ZC3H12A/RNF149 | 61 |
| BP | GO:0042590 | antigen processing and presentation of exogenous peptide antigen via MHC class I | 0.004514125 | 0.095484864 | B2M/CD36/CHUK/CYBA/FCER1G/PSMA2/PSMA5/PSMB1/PSMB2/PSMB7/PSMC1/PSME1/TAPBP/VAMP8/PSMF1/PSME3/IFI30/PSME4 | 18 |
| BP | GO:1990182 | exosomal secretion | 0.004519671 | 0.095484864 | IFNG/RAB27A/RAB7A/HGS/COPS5/ATP13A2/VPS4A | 7 |
| BP | GO:0043903 | regulation of symbiosis, encompassing mutualism through parasitism | 0.004527477 | 0.095484864 | ARG1/CD74/CFL1/DDX5/STOM/FCN1/LGALS9/NOTCH1/PC/PPID/NECTIN2/RAD23A/REST/CCL4/CCL5/SMARCA4/SRPK1/SUPT5H/TAF11/DYNLT1/TNF/TOP2B/TRIM25/RAB7A/NELFE/BANF1/CTDP1/TRIM28/IFITM2/SNW1/LARP1/IFIT5/NELFB/VPS4A/TRIM62/MAVS/NUCKS1/YTHDC2/ZC3H12A/TBC1D20 | 40 |
| BP | GO:0033574 | response to testosterone | 0.004532015 | 0.095484864 | CAD/CSNK2B/ELK1/GBA/GNRH1/HOXD13/MSN/NKX3-1/CFLAR/ROCK2/XRN1 | 11 |
| BP | GO:1904591 | positive regulation of protein import | 0.004532015 | 0.095484864 | IFNG/JUP/IPO5/PIK3R1/TPR/HYAL2/ZPR1/TRIM28/DMAP1/MAVS/ZC3H12A | 11 |
| BP | GO:0032784 | regulation of DNA-templated transcription, elongation | 0.004585171 | 0.096272836 | HNRNPU/SUPT5H/NELFE/RNF8/RECQL5/CTR9/THOC1/ALYREF/SUPT16H/NELFB/EAPP/WDR61/LEO1 | 13 |
| BP | GO:0009116 | nucleoside metabolic process | 0.004767983 | 0.099768409 | AMD1/AMPD3/RHOA/CAD/ERH/GNAI3/GUK1/IMPDH2/NME4/PNP/PPAT/GMPS/GTPBP1/ENTPD4/PEMT/MACROD1/NT5C/DERA/GMPR2/CMPK1/NUDT18/CDADC1/UCK1/MRI1/GIMAP7 | 25 |
| CC | GO:0005681 | spliceosomal complex | 8.76871E-11 | 6.48008E-08 | DDX5/DHX15/HNRNPA1/HNRNPA2B1/HNRNPF/HNRNPH3/HNRNPK/HNRNPU/MAGOH/SNU13/YBX1/RBM3/UPF1/RHEB/SRSF1/SNRPA/SNRPA1/SNRPD1/SNRPD3/SNRPE/SNRPF/PRPF4B/PRPF3/DDX23/AQR/RBM5/ALYREF/SF3A1/IVNS1ABP/USP39/U2AF2/RALY/SNW1/SF3B1/SRRM2/SYF2/PRPF31/RBMX2/SF3B6/LSM7/LUC7L3/C9orf78/PRPF38B/SMU1/PRPF40A/CWC22/LSM2/PTBP2/PHF5A/RBM17/ZCRB1/SREK1/SNRNP48/U2AF1L4 | 54 |
| CC | GO:0016607 | nuclear speck | 3.24655E-10 | 1.1996E-07 | BARD1/CDC34/CLK2/CRY2/DHX15/NR3C1/GTF2E2/HNRNPU/HSF4/HSPA1B/IL15/INPPL1/LIMK1/MAGOH/MBD1/OGG1/PIN1/PPP1CC/PRCC/RFXAP/RING1/BRD2/SFPQ/SRSF1/SRSF7/SNRPA1/TKT/DUSP11/PRPF4B/PRPF3/FIBP/TRIP11/RBM39/CTR9/SART3/SETD1A/BCLAF1/MAML1/AP5Z1/THOC1/ALYREF/TOPORS/SF3A1/SRSF10/NEK6/CKAP4/PACSIN2/DDX42/U2AF2/SNW1/ACIN1/PSME4/FNBP4/SF3B1/SRRM2/RCHY1/SYF2/PNISR/PRPF31/HBP1/RBM15B/CXXC1/ARL6IP4/LUC7L3/HAUS6/GPATCH2/SMU1/PSPC1/NCBP3/PRPF40A/THOC2/CWC22/LHPP/RBM15/THOC6/SMC6/ZC3H14/RNF34/ASCC2/POLDIP3/GLYR1/PHF5A/CCNB3/YTHDC1/SRSF12/SREK1/TEPSIN/PYHIN1/U2AF1L4/PATL1 | 90 |
| CC | GO:0098687 | chromosomal region | 4.53402E-07 | 0.000111688 | ATM/ATRX/CCNB1/CENPB/DAXX/HNRNPA2B1/HNRNPU/MCM6/MSH2/NBN/ORC2/ORC4/PAFAH1B1/PHF2/PLK1/POLD1/PPP1CA/PPP1CC/PRKDC/PURA/RAD17/RAD51/RANGAP1/UPF1/RPA2/SNAI1/SSB/TPR/MAD1L1/RNF8/AURKB/KNTC1/THOC1/REC8/ALYREF/STAG1/IKZF1/DCTN2/SPAG5/DCTN3/KDM1A/PDS5B/FBXO28/PDS5A/NUP160/SMG6/SMCHD1/ZNF330/RPA4/KMT5B/TRAPPC12/SPOUT1/NSMCE4A/NDE1/NHP2/NUP133/LRIF1/NUP107/THOC2/NABP2/THOC6/SMC6/CENPT/TNKS2/SEH1L/KIF2B/CENPL/CDCA5/MBD6/ANAPC16/CCDC155/SKA2/NUP43 | 73 |
| CC | GO:0071013 | catalytic step 2 spliceosome | 1.14732E-06 | 0.000211968 | DDX5/HNRNPA1/HNRNPA2B1/HNRNPF/HNRNPK/HNRNPU/MAGOH/SRSF1/SNRPA1/SNRPD1/SNRPD3/SNRPE/SNRPF/PRPF4B/DDX23/AQR/ALYREF/SF3A1/RALY/SNW1/SF3B1/SRRM2/SYF2/SF3B6/LSM7/CWC22/LSM2 | 27 |
| CC | GO:0000151 | ubiquitin ligase complex | 2.62153E-06 | 0.000387462 | AMFR/BARD1/PHC1/PHC2/RING1/TNFAIP1/UBE2E1/UBE2L3/VHL/PCGF2/GAN/CUL1/BTRC/RNF8/RNF7/DCAF1/TOPORS/ANAPC10/ARIH2/RBCK1/WWP2/ZSWIM8/DCUN1D4/KCTD2/ARIH1/RNF19A/RCHY1/FBXL3/LRRC29/FBXO2/RNF11/KLHL20/YPEL5/FBXW5/ANKIB1/FBXL19/FBXL12/GID8/USP47/RNF31/DCAF6/RANBP10/ZSWIM4/DDA1/FBXL15/DCAF10/FBXO11/SHARPIN/SPSB2/SPSB3/SPSB4/ANAPC16/MIB2/FBXL16/COMMD1/AMN1/UBR1/FBXL13/SPOPL/PEF1 | 60 |
| CC | GO:0071011 | precatalytic spliceosome | 9.39348E-06 | 0.001097614 | SNU13/SNRPA1/SNRPD1/SNRPD3/SNRPE/SNRPF/PRPF3/SF3A1/SF3B1/SRRM2/PRPF31/RBMX2/LSM7/PRPF38B/SMU1/CWC22/LSM2/PHF5A | 18 |
| CC | GO:1904813 | ficolin-1-rich granule lumen | 1.03969E-05 | 0.001097614 | AGL/ALDOA/AMPD3/ARSB/CAPN1/CSNK2B/CST3/CTSH/CFD/EEF2/FCN1/HSPA1B/IMPDH2/JUP/LTA4H/PNP/PFKL/PSMA2/PSMA5/PSMB1/PSMB7/DYNLT1/VCL/ACTR2/CCT8/COTL1/OSTF1/DERA/YPEL5/ACTR10/KCMF1/LRG1 | 32 |
| CC | GO:0005759 | mitochondrial matrix | 1.31698E-05 | 0.001123071 | ACO2/AMT/BCKDHB/C1QBP/MRPL49/CCNB1/CS/ECI1/DECR1/DLD/FDX1/FPGS/NR3C1/HSPA9/HSPE1/IDH3G/MDH2/MIPEP/ATXN3/NDUFA10/NDUFB8/NDUFS8/NME4/OXA1L/PC/PCK2/PDK2/PYCR1/RAD51/RPS3/SHC1/SOD1/TUFM/TYMS/VDAC2/DAP3/MTERF1/SUCLA2/TRAP1/WARS2/TXNRD2/CLPX/FASTK/ISCU/TXN2/HIBCH/ERAL1/MRPL18/PYCR2/MRPS18C/YARS2/MRPL4/MRPS2/MRPL30/PDP1/LRRC59/IARS2/OGDHL/ACSS2/GUF1/NSUN3/AGXT2/MRPS11/MRPS9/MRPS6/MRPL40/MRPL38/MRPL34/MRPS34/NARS2/ISCA1/ALKBH7/GFM2/MPV17L2/CBR4/ATG4D/PHYKPL/GFM1/MRPL53/NAXE/MMAA/ACSF3/RPUSD3/MMAB/GSTK1/D2HGDH | 86 |
| CC | GO:0044452 | nucleolar part | 1.36775E-05 | 0.001123071 | DKC1/ESRRA/SNU13/PEX14/CLEC3B/COIL/DUSP11/BTRC/TAF1C/TAF1B/RRP9/CRIPT/KDM4A/DCAF1/NUAK1/MPHOSPH10/DEAF1/WDR3/MALT1/SP140/BOP1/PES1/NOL11/TIMM13/AFF4/SESN1/APEX2/CC2D1A/PSPC1/WDR33/NHP2/POLR1E/NOL6/TAF1D/UTP15/MRI1/B3GNT9/MBD6/LEO1/TWISTNB/JAZF1 | 41 |
| CC | GO:0005689 | U12-type spliceosomal complex | 1.99985E-05 | 0.00147789 | DHX15/YBX1/SNRPD1/SNRPD3/SNRPE/SNRPF/SF3B1/SF3B6/LSM7/PHF5A/ZCRB1/SNRNP48 | 12 |
| CC | GO:0071005 | U2-type precatalytic spliceosome | 2.89826E-05 | 0.001852866 | SNU13/SNRPA1/SNRPD1/SNRPD3/SNRPE/SNRPF/PRPF3/SF3A1/SF3B1/SRRM2/PRPF31/RBMX2/LSM7/SMU1/CWC22/LSM2/PHF5A | 17 |
| CC | GO:0035579 | specific granule membrane | 3.00871E-05 | 0.001852866 | ALDH3B1/CEACAM1/MS4A3/CD33/CD36/CD47/CYBA/STOM/LAIR1/P2RX1/PLAUR/RAP1A/TNFRSF1B/VAMP8/DGAT1/ATP8A1/AGPAT2/CKAP4/SLC27A2/GPR84/MMP25/ORMDL3/ANO6/RAB37/SLCO4C1 | 25 |
| CC | GO:0044445 | cytosolic part | 6.77264E-05 | 0.003691802 | CHUK/EIF4EBP1/HBM/HPS1/PFKL/PIN1/PLCB3/PPP3CC/PRKCB/RPL5/RPL7/RPL18A/RPL19/RPL24/RPL30/RPL28/RPL34/RPL35A/RPS3/RPS11/RPS15A/RPS21/RPS29/SGTA/SH3GL2/MAP3K7/CCT3/BAG6/CFLAR/RPL23/FXR2/BAIAP2/CCT7/CCT8/IFIT5/BLOC1S6/PYCARD/RSL24D1/GET4/BCAS4/UBQLN4/MRPL1/ARRDC1-AS1/CTU1/ZNF622/SNAP47/STXBP5/RPL10L/PYDC1/BLOC1S3 | 50 |
| CC | GO:0005684 | U2-type spliceosomal complex | 7.25609E-05 | 0.003691802 | DHX15/SNU13/SNRPA1/SNRPD1/SNRPD3/SNRPE/SNRPF/PRPF3/AQR/SF3A1/U2AF2/SNW1/SF3B1/SRRM2/SYF2/PRPF31/RBMX2/LSM7/LUC7L3/SMU1/PRPF40A/CWC22/LSM2/PHF5A | 24 |
| CC | GO:0042581 | specific granule | 7.49351E-05 | 0.003691802 | ACAA1/ALDH3B1/ARG1/B2M/CEACAM1/MS4A3/CD33/CD36/CD47/CYBA/STOM/JUP/LAIR1/NEU1/P2RX1/PLAUR/PTPN6/RAB27A/RAP1A/TNFRSF1B/VCL/VAMP8/DGAT1/ATP8A1/AGPAT2/CKAP4/SLC27A2/GPR84/TOLLIP/MMP25/ORMDL3/LRG1/OSCAR/ANO6/RAB37/SLCO4C1 | 36 |
| CC | GO:0000775 | chromosome, centromeric region | 9.82908E-05 | 0.004495517 | ATRX/CCNB1/CENPB/DAXX/HNRNPU/ORC2/PAFAH1B1/PHF2/PLK1/PPP1CC/RANGAP1/SNAI1/TPR/MAD1L1/AURKB/KNTC1/REC8/STAG1/IKZF1/DCTN2/SPAG5/DCTN3/PDS5B/FBXO28/PDS5A/NUP160/ZNF330/KMT5B/TRAPPC12/SPOUT1/NDE1/NUP133/NUP107/CENPT/SEH1L/KIF2B/CENPL/CDCA5/ANAPC16/SKA2/NUP43 | 41 |
| CC | GO:0008287 | protein serine/threonine phosphatase complex | 0.000109498 | 0.004495517 | NCK1/PPP1CA/PPP1CC/PPP2R2B/PPP2R5D/PPP4C/PPP3CC/PPP3R1/SHOC2/CTDNEP1/PPP2R3B/PPP2R2D/PPP1R3B/PPP4R2/CNEP1R1 | 15 |
| CC | GO:1903293 | phosphatase complex | 0.000109498 | 0.004495517 | NCK1/PPP1CA/PPP1CC/PPP2R2B/PPP2R5D/PPP4C/PPP3CC/PPP3R1/SHOC2/CTDNEP1/PPP2R3B/PPP2R2D/PPP1R3B/PPP4R2/CNEP1R1 | 15 |
| CC | GO:0101002 | ficolin-1-rich granule | 0.00016992 | 0.00660898 | AGL/ALDOA/AMPD3/RHOA/ARSB/CAPN1/CR1/CSNK2B/CST3/CTSH/CFD/EEF2/FCER1G/FCN1/HSPA1B/IMPDH2/JUP/LTA4H/PNP/PFKL/PSMA2/PSMA5/PSMB1/PSMB7/PTPRN2/RAC1/DYNLT1/VCL/SIGLEC5/ACTR2/TCIRG1/CCT8/COTL1/OSTF1/DERA/YPEL5/ACTR10/KCMF1/LRG1 | 39 |
| CC | GO:0034708 | methyltransferase complex | 0.000201623 | 0.007449985 | E2F6/ERH/TRIM37/KDM5A/RBBP7/REST/SNRPD1/SNRPD3/SNRPE/SNRPF/TAF1/KDM5C/RUVBL1/EED/KDM4A/SETD1A/WDR5/MTF2/ZNF507/KDM6B/PRPF31/N6AMT1/RBM15B/CXXC1/TEX10/RBM15/TRMT61A | 27 |
| CC | GO:0005743 | mitochondrial inner membrane | 0.000249626 | 0.008784454 | ABCB7/SLC25A6/BCS1L/MRPL49/COX7B/COX7C/CRAT/TIMM8A/FPGS/MPV17/NDUFA4/NDUFA5/NDUFA10/NDUFB5/NDUFB8/NDUFS4/NDUFS8/NDUFV2/NDUFV3/NME4/OXA1L/RPS3/SCO1/SLC25A1/TAZ/TYMS/UCP2/DAP3/SLC25A11/TRAP1/SLC25A13/YME1L1/CLPX/AFG3L2/IMMT/MTCH2/MPC2/HIGD1A/ERAL1/TIMM13/UQCRQ/MRPL18/NDUFAF4/COQ6/MRPS18C/MRPL4/MRPS2/MRPL30/ECSIT/SLC25A37/NDUFB11/COA1/GUF1/MRPS11/MRPS9/MRPS6/MRPL40/MRPL38/MRPL34/MRPL1/MRPS34/SLC25A23/SLC8B1/EFHD1/IMMP2L/TMEM126A/MPV17L2/NDUFAF2/SLC25A51/RDH13/SLC25A26/MRPL53/NDUFA11/AIFM3/LDHD/SLC25A34/COX18/SLC25A35/CHCHD10/PLA2G4B/TIMM23B | 81 |
| CC | GO:0019005 | SCF ubiquitin ligase complex | 0.000273681 | 0.009193186 | CUL1/BTRC/RNF7/ARIH1/FBXL3/LRRC29/FBXO2/FBXW5/FBXL19/FBXL12/USP47/FBXL15/SPSB2/SPSB3/SPSB4/FBXL16/AMN1/FBXL13 | 18 |
| CC | GO:0031461 | cullin-RING ubiquitin ligase complex | 0.000287918 | 0.009250943 | TNFAIP1/GAN/CUL1/BTRC/RNF7/DCAF1/ANAPC10/ARIH2/ZSWIM8/KCTD2/ARIH1/FBXL3/LRRC29/FBXO2/KLHL20/FBXW5/FBXL19/FBXL12/USP47/DCAF6/ZSWIM4/DDA1/FBXL15/DCAF10/SPSB2/SPSB3/SPSB4/ANAPC16/FBXL16/COMMD1/AMN1/FBXL13/SPOPL/PEF1 | 34 |
| CC | GO:0032587 | ruffle membrane | 0.000402883 | 0.012073345 | AIF1/AKT2/RHOA/CFL1/MYO6/PDE4A/RAC1/RPS3/CDKL5/ADAM17/TLN1/PACSIN2/PIP5K1C/PSD4/DDX58/IFIT5/SH3YL1/EPS8L1/EPB41L5/PLEKHA1/SPRY4/TIRAP/FGD2 | 23 |
| CC | GO:0000781 | chromosome, telomeric region | 0.000415332 | 0.012073345 | ATM/ATRX/HNRNPA2B1/MCM6/MSH2/NBN/ORC2/ORC4/POLD1/PPP1CA/PPP1CC/PRKDC/PURA/RAD17/RAD51/UPF1/RPA2/SSB/RNF8/THOC1/ALYREF/KDM1A/SMG6/SMCHD1/RPA4/NSMCE4A/NHP2/LRIF1/THOC2/NABP2/THOC6/SMC6/TNKS2/CCDC155 | 34 |
| CC | GO:0000779 | condensed chromosome, centromeric region | 0.000424773 | 0.012073345 | ATRX/CCNB1/CENPB/HNRNPU/ORC2/PHF2/PLK1/PPP1CC/RANGAP1/MAD1L1/AURKB/KNTC1/REC8/SPAG5/DCTN3/FBXO28/KMT5B/SPOUT1/NDE1/NUP133/NUP107/CENPT/SEH1L/KIF2B/ANAPC16/SKA2/NUP43 | 27 |
| CC | GO:0034399 | nuclear periphery | 0.000476968 | 0.0130548 | CAD/CFL1/CSNK2B/HNRNPA2B1/HNRNPU/KRT8/MBD1/ATXN3/OGG1/SFPQ/SRPK1/TPR/RUVBL1/THOC1/STAG1/ATF7/XPOT/SNW1/KIF4A/NSMF/UHRF1/CXXC1/PSPC1/PRPF40A/LRIF1/NUP107/PRR14/PHF5A/NUP35 | 29 |
| CC | GO:0000922 | spindle pole | 0.000590449 | 0.015518455 | CCNB1/PLK3/HNRNPU/KIF2A/NPM1/PLK1/TPT1/UMOD/MAD1L1/UNC119/CTDP1/AURKB/KNTC1/TOPORS/STAG1/KATNB1/SPAG5/RGS14/NEK6/RASSF1/VPS4A/SBDS/SPOUT1/YPEL5/NDE1/PLEKHG6/BEX4/CSPP1/FAM110A/CEP19/TUBGCP5/PLK5/NEK7/CCDC155 | 34 |
| CC | GO:0044391 | ribosomal subunit | 0.000608979 | 0.015518455 | MRPL49/RBM3/RPL5/RPL7/RPL18A/RPL19/RPL24/RPL30/RPL28/RPL34/RPL35A/RPS3/RPS11/RPS15A/RPS21/RPS29/DAP3/RPL23/FXR2/MRPL18/MRPS18C/MRPL4/MRPS2/RSL24D1/MRPL30/NSUN3/MRPS11/MRPS9/MRPS6/MRPL40/MRPL38/MRPL34/MRPL1/MRPS34/MPV17L2/ZNF622/MRPL53/RPL10L | 38 |
| CC | GO:0000776 | kinetochore | 0.000798723 | 0.019149329 | CCNB1/HNRNPU/ORC2/PAFAH1B1/PHF2/PLK1/PPP1CC/RANGAP1/TPR/MAD1L1/AURKB/KNTC1/REC8/DCTN2/SPAG5/DCTN3/FBXO28/NUP160/TRAPPC12/SPOUT1/NDE1/NUP133/NUP107/CENPT/SEH1L/KIF2B/ANAPC16/SKA2/NUP43 | 29 |
| CC | GO:0034774 | secretory granule lumen | 0.000803287 | 0.019149329 | ACAA1/ACTN1/AGL/ALDOA/AMPD3/ARG1/ARSB/B2M/CSNK2B/CTSH/CFD/EEF2/FCN1/GALNS/GAS6/GM2A/GRN/IMPDH2/JUP/NEU1/PNP/PFKL/PROS1/PSMA2/PSMA5/PSMB1/PSMB7/PTPN6/RAB27A/RARRES2/DYNLT1/TIMP1/TIMP3/CLEC3B/VCL/VEGFB/ACTR2/TUBB4B/CCT8/MAGED2/COTL1/OSTF1/PYCARD/DPP7/DERA/TOLLIP/GTPBP2/TOR4A/CDC37L1/ACTR10/TRAPPC1/NAPRT/STK11IP/LRG1/OSCAR/TUBB/NHLRC2 | 57 |
| CC | GO:0005884 | actin filament | 0.000870282 | 0.019646631 | ACTA1/ACTN1/AIF1/MARK2/HCK/MYO6/MYO9B/PKD2/RAC1/SMTN/WAS/GAS7/PDLIM4/PSTPIP1/PDLIM7/TWF2/COBL/COTL1/SPTBN5/BIN3/CORO1B/VPS18/PDLIM2/WIPF2/ESPNL | 25 |
| CC | GO:0016605 | PML body | 0.000877319 | 0.019646631 | ATRX/DAXX/CIITA/NBN/MAPK7/RAD51/RNF6/RPA2/NR2C1/SQSTM1/IKBKE/TOPORS/RGS14/SP140/ANKRD2/KLHL20/HIPK2/TDP2/TENM2/SENP2/SMC6/CIART/PATL1 | 23 |
| CC | GO:0060205 | cytoplasmic vesicle lumen | 0.001012954 | 0.022016847 | ACAA1/ACTN1/AGL/ALDOA/AMPD3/ARG1/ARSB/B2M/CSNK2B/CTSH/CFD/EEF2/FCN1/GALNS/GAS6/GM2A/GRN/HPX/IMPDH2/JUP/NEU1/PNP/PFKL/PROS1/PSMA2/PSMA5/PSMB1/PSMB7/PTPN6/RAB27A/RARRES2/DYNLT1/TIMP1/TIMP3/CLEC3B/VCL/VEGFB/ACTR2/TUBB4B/GNLY/CCT8/MAGED2/COTL1/OSTF1/PYCARD/DPP7/DERA/TOLLIP/GTPBP2/TOR4A/CDC37L1/ACTR10/TRAPPC1/NAPRT/STK11IP/LRG1/OSCAR/TUBB/NHLRC2 | 59 |
| CC | GO:0031983 | vesicle lumen | 0.001089911 | 0.023012686 | ACAA1/ACTN1/AGL/ALDOA/AMPD3/ARG1/ARSB/B2M/CSNK2B/CTSH/CFD/EEF2/FCN1/GALNS/GAS6/GM2A/GRN/HPX/IMPDH2/JUP/NEU1/PNP/PFKL/PROS1/PSMA2/PSMA5/PSMB1/PSMB7/PTPN6/RAB27A/RARRES2/DYNLT1/TIMP1/TIMP3/CLEC3B/VCL/VEGFB/ACTR2/TUBB4B/GNLY/CCT8/MAGED2/COTL1/OSTF1/PYCARD/DPP7/DERA/TOLLIP/GTPBP2/TOR4A/CDC37L1/ACTR10/TRAPPC1/NAPRT/STK11IP/LRG1/OSCAR/TUBB/NHLRC2 | 59 |
| CC | GO:0005774 | vacuolar membrane | 0.00126764 | 0.025559476 | AP1B1/ANPEP/ATP6V0B/CD1D/SCARB1/CD74/AP2M1/AP1S1/CLCN6/CLN3/COL6A1/STOM/GBA/GNAI3/GNB2/GRN/MYO6/NEU1/NPC1/PIGR/RHEB/RPN2/THBD/LAPTM5/RAB7A/NPRL3/VAMP8/NAPA/MTMR2/ATP6V1F/ENTPD4/PLEKHM1/FLOT1/TCIRG1/RRAGB/ATP8A1/STARD3/CKAP4/DNAJC13/ATP13A2/SLC17A5/VPS41/VPS4A/SIDT2/SLC15A3/SLC22A17/ATP6V1H/TLR9/SLC35F6/SLC48A1/VAC14/AP5M1/LMBRD1/VPS11/SPPL2B/GOPC/VPS18/SEH1L/MAGT1/WDR24/TMEM79/ABCC10/STK11IP/MFSD12/SPPL2C/SLC36A1/RNF152/RAB37/SLCO4C1 | 69 |
| CC | GO:0005925 | focal adhesion | 0.001279703 | 0.025559476 | ACTB/ACTN1/RHOA/B2M/CAPN1/CD151/CFL1/CYBA/FES/FHL3/FLOT2/GNB2/HCK/HMGA1/HNRNPK/HSPA1B/HSPA9/ITGA4/ITGB8/JUP/LIMK1/MMP14/MSN/NPM1/PCBP2/PDPK1/PI4KA/PLAUR/PLEC/PPP1CC/MAP2K2/PTPRC/NECTIN2/PXN/RAC1/RPL5/RPL7/RPL19/RPL30/RPS3/RPS11/RPS29/SLC4A2/SNTB2/ADAM17/TLN1/VCL/PDLIM7/RPL23/ACTR2/FLOT1/TRIOBP/PACSIN2/MTF2/SYNE2/PIP5K1C/TES/SH3KBP1/DCAF6/CORO1B/EPB41L5/ARHGAP22/ATAT1/SPRY4/ALKBH6/SCARF2/TADA1/ARL14EP | 68 |
| CC | GO:0001726 | ruffle | 0.001411275 | 0.02669652 | ACTN1/AIF1/AKT2/RHOA/CAPG/CFL1/MYO6/PDE4A/RAB5A/RAC1/RPS3/CDKL5/ADAM17/TLN1/PDLIM7/SLC9A3R1/BAIAP2/PACSIN2/COBL/PIP5K1C/PSD4/DDX58/ARFIP2/IFIT5/SH3YL1/TRPM7/EPS8L1/RAB22A/EPB41L5/PLEKHA1/ARAP3/SPRY4/TIRAP/FGD2 | 34 |
| CC | GO:0015934 | large ribosomal subunit | 0.001443343 | 0.02669652 | MRPL49/RBM3/RPL5/RPL7/RPL18A/RPL19/RPL24/RPL30/RPL28/RPL34/RPL35A/RPL23/FXR2/MRPL18/MRPL4/RSL24D1/MRPL30/NSUN3/MRPL40/MRPL38/MRPL34/MRPL1/MPV17L2/ZNF622/MRPL53/RPL10L | 26 |
| CC | GO:0016363 | nuclear matrix | 0.001520935 | 0.02669652 | CAD/CFL1/CSNK2B/HNRNPA2B1/HNRNPU/KRT8/MBD1/ATXN3/OGG1/SFPQ/SRPK1/RUVBL1/THOC1/STAG1/XPOT/SNW1/KIF4A/NSMF/UHRF1/CXXC1/PSPC1/PRPF40A/LRIF1/PHF5A | 24 |
| CC | GO:0000803 | sex chromosome | 0.001522144 | 0.02669652 | BIRC2/HNRNPU/RING1/PCGF2/EED/SIN3B/SMCHD1/LRIF1/DMRTC2/SMC6 | 10 |
| CC | GO:0071007 | U2-type catalytic step 2 spliceosome | 0.001522144 | 0.02669652 | SNRPA1/SNRPD1/SNRPD3/SNRPE/SNRPF/AQR/SNW1/SRRM2/SYF2/CWC22 | 10 |
| CC | GO:0005924 | cell-substrate adherens junction | 0.001553383 | 0.02669652 | ACTB/ACTN1/RHOA/B2M/CAPN1/CD151/CFL1/CYBA/FES/FHL3/FLOT2/GNB2/HCK/HMGA1/HNRNPK/HSPA1B/HSPA9/ITGA4/ITGB8/JUP/LIMK1/MMP14/MSN/NPM1/PCBP2/PDPK1/PI4KA/PLAUR/PLEC/PPP1CC/MAP2K2/PTPRC/NECTIN2/PXN/RAC1/RPL5/RPL7/RPL19/RPL30/RPS3/RPS11/RPS29/SLC4A2/SNTB2/ADAM17/TLN1/VCL/PDLIM7/RPL23/ACTR2/FLOT1/TRIOBP/PACSIN2/MTF2/SYNE2/PIP5K1C/TES/SH3KBP1/DCAF6/CORO1B/EPB41L5/ARHGAP22/ATAT1/SPRY4/ALKBH6/SCARF2/TADA1/ARL14EP | 68 |
| CC | GO:0031252 | cell leading edge | 0.001783898 | 0.02996137 | ACTA1/ACTG2/ACTN1/AIF1/AKT2/RHOA/CAPG/CFL1/FER/FLOT2/INPPL1/KCNC4/LIMK1/MYO6/PAFAH1B1/PDE4A/PKD2/PRKCI/PTPN13/PTPRO/PXN/RAB5A/RAC1/RPS3/SNX1/CDKL5/ADAM17/DYNLT1/TLN1/DYSF/PDLIM4/PSTPIP1/PDLIM7/SLC9A3R1/HDAC6/ACTR2/ABI2/FLOT1/TUBB3/BAIAP2/PACSIN2/TWF2/PLXND1/SYNE2/COBL/PIP5K1C/PSD4/DDX58/FAM89B/ARFIP2/IFIT5/SH3YL1/ABI3/TRPM7/EPS8L1/VEZT/CORO1B/RAB22A/EPB41L5/PLEKHA1/MYO1G/ARAP3/SPRY4/TIRAP/EXOC8/FGD2/SHISA7 | 67 |
| CC | GO:0030667 | secretory granule membrane | 0.001959162 | 0.030752343 | ALDH3B1/ANPEP/ANXA7/RHOA/CEACAM1/C5AR1/MS4A3/CD33/CD36/CD47/CR1/CYBA/STOM/FCER1G/FCGR3B/FLOT2/LAIR1/P2RX1/PAM/PIGR/PLAUR/PTPRC/PTPRN2/RAB3A/RAB5B/RAB27A/RAC1/RAP1A/SYT5/TNFRSF1B/RAB7A/VAMP8/DGAT1/SIGLEC5/TRIP11/TCIRG1/ATP8A1/AGPAT2/CKAP4/SLC27A2/LILRB3/DNAJC13/GPR84/TMX3/MMP25/MAGT1/ACRBP/ORMDL3/FAM170B/ANO6/RAB37/SLCO4C1 | 52 |
| CC | GO:0030055 | cell-substrate junction | 0.00199809 | 0.030752343 | ACTB/ACTN1/RHOA/B2M/CAPN1/CD151/CFL1/CYBA/FES/FHL3/FLOT2/GNB2/HCK/HMGA1/HNRNPK/HSPA1B/HSPA9/ITGA4/ITGB8/JUP/LIMK1/MMP14/MSN/NPM1/PCBP2/PDPK1/PI4KA/PLAUR/PLEC/PPP1CC/MAP2K2/PTPRC/NECTIN2/PXN/RAC1/RPL5/RPL7/RPL19/RPL30/RPS3/RPS11/RPS29/SLC4A2/SNTB2/ADAM17/TLN1/VCL/PDLIM7/RPL23/ACTR2/FLOT1/TRIOBP/PACSIN2/MTF2/SYNE2/PIP5K1C/TES/SH3KBP1/DCAF6/CORO1B/EPB41L5/ARHGAP22/ATAT1/SPRY4/ALKBH6/SCARF2/TADA1/ARL14EP | 68 |
| CC | GO:0030686 | 90S preribosome | 0.002014683 | 0.030752343 | NOP14/BTRC/MPHOSPH10/WDR3/BOP1/PES1/NOL6/NOC4L/FAM207A/RRP36 | 10 |
| CC | GO:0000777 | condensed chromosome kinetochore | 0.002025075 | 0.030752343 | CCNB1/HNRNPU/ORC2/PHF2/PLK1/PPP1CC/RANGAP1/MAD1L1/KNTC1/REC8/SPAG5/DCTN3/FBXO28/SPOUT1/NDE1/NUP133/NUP107/CENPT/SEH1L/KIF2B/ANAPC16/SKA2/NUP43 | 23 |
| CC | GO:0001931 | uropod | 0.002080673 | 0.030752343 | FLOT2/ICAM2/MSN/PSTPIP1/FLOT1/PIP5K1C | 6 |
| CC | GO:0031254 | cell trailing edge | 0.002080673 | 0.030752343 | FLOT2/ICAM2/MSN/PSTPIP1/FLOT1/PIP5K1C | 6 |
| CC | GO:0030176 | integral component of endoplasmic reticulum membrane | 0.002161848 | 0.030868103 | AMFR/B2M/CD74/CLN3/DHCR7/SLC37A4/INSIG1/PKD2/SREBF2/STIM1/TAPBP/TM7SF2/GPAA1/SGPL1/BCAP31/EMC8/SLC27A5/SLC27A2/FICD/PIGT/ERGIC3/SLC37A1/EMC7/SPPL2B/ELOVL1/PORCN/ELOVL6/SPPL2C/EMC10/SLC35B2 | 30 |
| CC | GO:0031300 | intrinsic component of organelle membrane | 0.002172045 | 0.030868103 | MFNG/NPC1/OXA1L/P2RX1/PCSK5/PEX13/PTPRN2/RAB3A/RAB5A/RAB5B/RFNG/SCO1/SLC6A9/STX1A/SYT5/STX10/RAB11B/PEX16/ITM2B/ENTPD4/TOMM20/YIF1A/AFG3L2/IMMT/SLC27A2/RER1/ATP13A2/MPC2/ZDHHC9/BET1L/SLC22A17/ERGIC3/SLC35A5/POMGNT1/COA1/SLC8B1/TBC1D20/RNF152/COX18/SLC35B2/SLC6A17/CHCHD10/TIMM23B | 43 |
| CC | GO:0000784 | nuclear chromosome, telomeric region | 0.002343738 | 0.032679668 | ATM/ATRX/MCM6/MSH2/NBN/ORC2/ORC4/POLD1/PPP1CA/PPP1CC/PRKDC/PURA/RAD51/UPF1/RPA2/SSB/THOC1/ALYREF/KDM1A/SMCHD1/NHP2/LRIF1/THOC2/NABP2/THOC6/TNKS2 | 26 |
| CC | GO:0030684 | preribosome | 0.002433601 | 0.032915696 | SNU13/NOP14/BTRC/RRP9/MPHOSPH10/WDR3/BOP1/PES1/NIP7/TSR1/NOL6/NOC4L/RPF1/UTP23/MAK16/FAM207A/RRP36/ZNF622 | 18 |
| CC | GO:0001650 | fibrillar center | 0.002513741 | 0.032915696 | DKC1/ESRRA/PEX14/COIL/DUSP11/TAF1C/CRIPT/KDM4A/DCAF1/NUAK1/DEAF1/MALT1/SP140/TIMM13/AFF4/SESN1/APEX2/CC2D1A/PSPC1/WDR33/POLR1E/UTP15/MRI1/B3GNT9/MBD6/LEO1/JAZF1 | 27 |
| CC | GO:0031227 | intrinsic component of endoplasmic reticulum membrane | 0.002519025 | 0.032915696 | AMFR/B2M/CD74/CLN3/DHCR7/SLC37A4/INSIG1/PKD2/SREBF2/STIM1/TAPBP/TM7SF2/GPAA1/SGPL1/BCAP31/EMC8/SLC27A5/SLC27A2/FICD/PIGT/ERGIC3/SLC37A1/EMC7/SPPL2B/GRAMD1A/ELOVL1/PORCN/ELOVL6/SPPL2C/EMC10/SLC35B2 | 31 |
| CC | GO:0005874 | microtubule | 0.002551048 | 0.032915696 | ARHGAP4/KIF1A/CSNK1D/CYLD/HNRNPU/KIF2A/KLC1/MAP3K11/ROR2/PAFAH1B1/PLK1/MAP2K2/SNTB2/SS18/STIM1/DYNLT1/TPT1/CCT3/TUBA4A/TUBA1A/DYSF/EIF3A/AURKB/KNTC1/HDAC6/KATNB1/TUBB3/TUBB4B/NDRG1/BAIAP2/DCTN2/CCT7/SPAG5/RGS14/CCT8/NEK6/RASSF1/DCTN3/CEP162/RUSC1/KIF4A/CFAP20/DCXR/HAUS6/NDE1/KIF26B/BEX4/MID1IP1/KLC2/HAUS3/CSPP1/ATAT1/REEP4/DNAL1/RASSF5/ENKD1/KIF2B/TRIM55/CEP295/KIFC2/TUBGCP5/NEK7/DYNLL2/TTLL11/TUBB/CEP170B/CEP57L1/SKA2 | 68 |
| CC | GO:0005686 | U2 snRNP | 0.002601945 | 0.032915696 | SNRPA1/SNRPD1/SNRPD3/SNRPE/SF3A1/SF3B1/RBMX2/SF3B6/PHF5A | 9 |
| CC | GO:0032839 | dendrite cytoplasm | 0.002627911 | 0.032915696 | DLG4/FLOT2/HNRNPU/PURA/SFPQ/SOD1/CDKL5/BAIAP2/ABHD12/ZC3H14 | 10 |
| CC | GO:0005765 | lysosomal membrane | 0.003047161 | 0.036768279 | AP1B1/ANPEP/CD1D/SCARB1/CD74/AP2M1/AP1S1/CLCN6/CLN3/COL6A1/STOM/GBA/GNAI3/GNB2/GRN/MYO6/NEU1/NPC1/PIGR/RHEB/LAPTM5/RAB7A/NPRL3/VAMP8/PLEKHM1/FLOT1/TCIRG1/RRAGB/ATP8A1/STARD3/CKAP4/DNAJC13/ATP13A2/SLC17A5/VPS41/SIDT2/SLC15A3/ATP6V1H/TLR9/SLC35F6/SLC48A1/AP5M1/LMBRD1/VPS11/SPPL2B/GOPC/VPS18/SEH1L/MAGT1/WDR24/TMEM79/ABCC10/STK11IP/MFSD12/SPPL2C/SLC36A1/RNF152/RAB37/SLCO4C1 | 59 |
| CC | GO:0005819 | spindle | 0.003079303 | 0.036768279 | ATM/CAPG/CCNB1/PLK3/CRMP1/CSNK1D/CYLD/KAT2A/NR3C1/HNRNPU/KIF2A/NPM1/PAFAH1B1/PKD2/PLK1/RANGAP1/RPS3/DYNLT1/TPR/TPT1/UMOD/MAD1L1/UNC119/CTDP1/AURKB/KNTC1/TOPORS/STAG1/KATNB1/SPAG5/RGS14/NEK6/RASSF1/DCTN3/CEP162/KIF4A/VPS4A/SBDS/SPOUT1/YPEL5/HAUS6/NDE1/PLEKHG6/MAP7D1/BEX4/HAUS3/TBL1XR1/CSPP1/ATAT1/FAM110A/KIF2B/CEP19/CEP295/TUBGCP5/PLK5/NEK7/CCDC155/SKA2 | 58 |
| CC | GO:0098852 | lytic vacuole membrane | 0.003248667 | 0.036768279 | AP1B1/ANPEP/CD1D/SCARB1/CD74/AP2M1/AP1S1/CLCN6/CLN3/COL6A1/STOM/GBA/GNAI3/GNB2/GRN/MYO6/NEU1/NPC1/PIGR/RHEB/LAPTM5/RAB7A/NPRL3/VAMP8/PLEKHM1/FLOT1/TCIRG1/RRAGB/ATP8A1/STARD3/CKAP4/DNAJC13/ATP13A2/SLC17A5/VPS41/SIDT2/SLC15A3/ATP6V1H/TLR9/SLC35F6/SLC48A1/AP5M1/LMBRD1/VPS11/SPPL2B/GOPC/VPS18/SEH1L/MAGT1/WDR24/TMEM79/ABCC10/STK11IP/MFSD12/SPPL2C/SLC36A1/RNF152/RAB37/SLCO4C1 | 59 |
| CC | GO:0000164 | protein phosphatase type 1 complex | 0.003278558 | 0.036768279 | NCK1/PPP1CA/PPP1CC/SHOC2/PPP1R3B | 5 |
| CC | GO:0031080 | nuclear pore outer ring | 0.003278558 | 0.036768279 | NUP160/NUP133/NUP107/SEH1L/NUP43 | 5 |
| CC | GO:0005844 | polysome | 0.003279674 | 0.036768279 | EEF2/EIF4B/EIF4G1/RPL18A/RPL19/RPL24/RPL30/RPS3/RPS21/RPS29/FXR2/LARP1/LARP6/NUFIP2/NAA35/UNK/RPL10L | 17 |
| CC | GO:0000177 | cytoplasmic exosome (RNase complex) | 0.003283771 | 0.036768279 | EXOSC9/GTPBP1/DIS3/EXOSC2/CARHSP1/EXOSC3 | 6 |
| CC | GO:0030532 | small nuclear ribonucleoprotein complex | 0.004443619 | 0.048577889 | SNU13/SNRPA/SNRPA1/SNRPD1/SNRPD3/SNRPE/SNRPF/PRPF3/DDX23/SART3/SF3A1/USP39/SF3B1/PRPF31/RBMX2/SF3B6/LSM7/LUC7L3/PRPF40A/LSM2/PHF5A/TGS1 | 22 |
| CC | GO:0099522 | region of cytosol | 0.004469955 | 0.048577889 | EIF4EBP1/PIN1/PLCB3/PPP3CC/PRKCB/SH3GL2/BAIAP2/STXBP5 | 8 |
| CC | GO:0097525 | spliceosomal snRNP complex | 0.004620201 | 0.049483027 | SNU13/SNRPA/SNRPA1/SNRPD1/SNRPD3/SNRPE/SNRPF/PRPF3/DDX23/SART3/SF3A1/USP39/SF3B1/PRPF31/RBMX2/SF3B6/LSM7/LUC7L3/PRPF40A/LSM2/PHF5A | 21 |
| CC | GO:0098562 | cytoplasmic side of membrane | 0.004740616 | 0.050047361 | BIRC2/RHOA/CHUK/CYLD/DLG4/FER/FES/G6PD/GM2A/GNAI3/GNG4/GNRH1/HCK/HIP1/JUP/NTSR1/CDK16/PKD2/MAP2K2/PTPRC/RAB5A/RPS29/OSBPL2/NPTXR/LDLRAP1/RNF31/EXOC1/SPPL2B/GRAMD1A/THADA/RASAL3/SPPL2C/D2HGDH | 33 |
| CC | GO:0005635 | nuclear envelope | 0.004856053 | 0.050543985 | BIN1/ANXA7/DHCR7/KPNA3/IPO5/MYO6/NPC1/YBX1/P2RX1/PAFAH1B1/RANBP2/RANGAP1/RNF6/STX1A/MLX/TM7SF2/TMPO/TPR/MAD1L1/RANBP3/BANF1/SLC16A3/WDR3/XPOT/SP140/ZBTB1/SYNE2/NUP160/CTDNEP1/NSMF/FAM169A/TOR2A/TFPT/RBM15B/RTCB/NUP54/TOR4A/TMEM38B/LRRC59/NUP133/PCID2/NUP107/INTS2/DISP3/SENP2/DNAJC1/TOR3A/RBM15/C12orf43/CUEDC2/TMEM38A/NOC4L/TNKS2/POLR2M/SEH1L/BRIP1/TNRC18/TBC1D20/NUP35/TMEM18/EIF5AL1/TMEM120B/TEPSIN/CCDC155/SYNE3/TUBB/NAPEPLD/CNEP1R1/SUN3/SCAI/NUP43/RGPD2/DUX4 | 73 |
| CC | GO:0098554 | cytoplasmic side of endoplasmic reticulum membrane | 0.004937171 | 0.050674573 | GNRH1/PKD2/RPS29/SPPL2B/THADA/SPPL2C | 6 |
| CC | GO:0022625 | cytosolic large ribosomal subunit | 0.005118229 | 0.051813302 | RPL5/RPL7/RPL18A/RPL19/RPL24/RPL30/RPL28/RPL34/RPL35A/RPL23/FXR2/RSL24D1/MRPL1/ZNF622/RPL10L | 15 |
| CC | GO:0031301 | integral component of organelle membrane | 0.005474317 | 0.05466919 | MFNG/NPC1/OXA1L/P2RX1/PCSK5/PEX13/PTPRN2/RFNG/SCO1/SLC6A9/STX1A/SYT5/STX10/PEX16/ITM2B/ENTPD4/TOMM20/YIF1A/AFG3L2/IMMT/SLC27A2/RER1/ATP13A2/MPC2/BET1L/SLC22A17/ERGIC3/SLC35A5/POMGNT1/COA1/SLC8B1/TBC1D20/RNF152/COX18/SLC35B2/SLC6A17/CHCHD10/TIMM23B | 38 |
| CC | GO:0035145 | exon-exon junction complex | 0.005719299 | 0.056109885 | MAGOH/UPF1/SRSF1/ALYREF/SMG6/UPF3A/R3HCC1 | 7 |
| CC | GO:0016234 | inclusion body | 0.005770435 | 0.056109885 | AGL/EEF2/HSPA1B/ATXN3/TRIM37/NBN/POLD1/RANBP2/RANGAP1/TPR/ZBTB14/SQSTM1/HERPUD1/HDAC6/SYNE2/ARIH1/SERGEF/TDP2 | 18 |
| CC | GO:0005643 | nuclear pore | 0.006371019 | 0.061145234 | KPNA3/IPO5/RANBP2/RANGAP1/TPR/MAD1L1/RANBP3/XPOT/NUP160/NUP54/NUP133/PCID2/NUP107/SENP2/SEH1L/NUP35/EIF5AL1/NUP43/RGPD2 | 19 |
| CC | GO:0031253 | cell projection membrane | 0.006668692 | 0.063181583 | AIF1/AKT2/RHOA/CEACAM1/CD36/SCARB1/CFL1/CLTB/KCNC4/MSN/MYO6/PDE4A/PDE6G/PKD1/PKD2/PLAUR/PEX19/RAC1/RPS3/SLC5A1/SLC9A3/SLC22A5/CDKL5/ADAM17/TLN1/UMOD/SHOC2/SLC5A6/SLC9A3R1/MFSD10/PEMT/PACSIN2/PHLPP2/PLXND1/SYNE2/IQCE/PIP5K1C/PSD4/DDX58/IFIT5/SH3YL1/ASAP1/SPTBN5/EPS8L1/VEZT/EPB41L5/PLEKHA1/SLC26A6/AMN/SPRY4/SYTL1/TIRAP/ARL13B/FGD2/NAPEPLD/SHISA7 | 56 |
| CC | GO:0030479 | actin cortical patch | 0.007128249 | 0.064241175 | GMFB/HIP1/WAS/ACTR2/BIN3/WIPF2 | 6 |
| CC | GO:0061645 | endocytic patch | 0.007128249 | 0.064241175 | GMFB/HIP1/WAS/ACTR2/BIN3/WIPF2 | 6 |
| CC | GO:0071004 | U2-type prespliceosome | 0.007128249 | 0.064241175 | SF3A1/U2AF2/SF3B1/LSM7/LUC7L3/PRPF40A | 6 |
| CC | GO:0071010 | prespliceosome | 0.007128249 | 0.064241175 | SF3A1/U2AF2/SF3B1/LSM7/LUC7L3/PRPF40A | 6 |
| CC | GO:0120111 | neuron projection cytoplasm | 0.007486343 | 0.066655508 | KIF1A/DLG4/FLOT2/HNRNPU/PAFAH1B1/PURA/RANGAP1/SFPQ/SOD1/CDKL5/BAIAP2/KIF4A/ABHD12/BLOC1S6/ACTR10/ZC3H14/TRIM46/BLOC1S3 | 18 |
| CC | GO:0034709 | methylosome | 0.008431656 | 0.073305809 | ERH/SNRPD1/SNRPD3/SNRPE/SNRPF | 5 |
| CC | GO:0044615 | nuclear pore nuclear basket | 0.008431656 | 0.073305809 | RANBP2/TPR/MAD1L1/PCID2/NUP35 | 5 |
| CC | GO:0016235 | aggresome | 0.00888218 | 0.075556923 | EEF2/HSPA1B/TRIM37/POLD1/RANGAP1/ZBTB14/SQSTM1/HDAC6/SYNE2/SERGEF/TDP2 | 11 |
| CC | GO:0018995 | host | 0.009071656 | 0.075556923 | KPNA3/PI4KA/RANBP2/SCO1/DYNLT1/TOP2B/TPR/NUP160/VPS28/NUP54/VPS37C/NUP133/NUP107/SEH1L/NUP35/NUP43 | 16 |
| CC | GO:0043657 | host cell | 0.009071656 | 0.075556923 | KPNA3/PI4KA/RANBP2/SCO1/DYNLT1/TOP2B/TPR/NUP160/VPS28/NUP54/VPS37C/NUP133/NUP107/SEH1L/NUP35/NUP43 | 16 |
| CC | GO:0042788 | polysomal ribosome | 0.009099548 | 0.075556923 | EEF2/RPL18A/RPL19/RPL24/RPL30/RPS21/RPS29/LARP1/NUFIP2 | 9 |
| CC | GO:0005875 | microtubule associated complex | 0.009558482 | 0.077897088 | KIF1A/KIF2A/KLC1/PAFAH1B1/PXN/DYNLT1/TPR/SNX4/AURKB/HDAC6/TOPORS/KATNB1/DCTN2/DCTN3/RABGAP1/KIF4A/HAUS6/NDE1/KIF26B/ACTR10/KLC2/HAUS3/DNAL1/KIF2B/WDR34/KIFC2/DYNLL2/DNHD1 | 28 |
| CC | GO:0035097 | histone methyltransferase complex | 0.009592199 | 0.077897088 | E2F6/TRIM37/KDM5A/RBBP7/REST/TAF1/KDM5C/RUVBL1/EED/KDM4A/SETD1A/WDR5/MTF2/ZNF507/KDM6B/PRPF31/CXXC1/TEX10 | 18 |
| CC | GO:0000793 | condensed chromosome | 0.010705602 | 0.085993909 | ATRX/CCNB1/CENPB/HNRNPU/ORC2/PHF2/PLK1/PPP1CC/RAD1/RAD51/RANGAP1/MAD1L1/BANF1/AURKB/KNTC1/REC8/STAG1/SPAG5/DCTN3/FBXO28/PES1/NCAPH2/KMT5B/SPOUT1/NSMCE4A/NDE1/NUP133/NUP107/NOL6/SMC6/CENPT/SEH1L/KIF2B/CDCA5/ANAPC16/CCDC155/SKA2/NUP43 | 38 |
| CC | GO:0030139 | endocytic vesicle | 0.011337635 | 0.090091531 | ATP6V0B/B2M/CAMK2D/CD36/SCARB1/CD74/AP2M1/CLTB/CYBA/DLG4/HBEGF/FLOT2/HIP1/HPX/MYO6/ROR2/PIK3C3/RAB5A/RAB5B/RAP1A/SH3GL2/TAPBP/WAS/WNT6/FZD5/RAB7A/DYSF/SCARF1/VAMP8/HYAL2/SPHK1/RABEP1/RAB11B/ATG5/TCIRG1/GNLY/GIPC1/FCHO1/STAB1/SH3KBP1/TLR9/HEATR5B/LMBRD1/VPS11/RAB22A/UNC93B1/AMN/TIRAP/RAB43 | 49 |
| CC | GO:0005687 | U4 snRNP | 0.012401021 | 0.097088579 | SNRPD1/SNRPD3/SNRPE/SNRPF/PRPF31 | 5 |
| CC | GO:0000502 | proteasome complex | 0.012513993 | 0.097088579 | PSMA2/PSMA5/PSMB1/PSMB2/PSMB7/PSMC1/PSME1/RAD23A/UBE3A/PSMF1/PSME3/PSME4/UBQLN4/UBR1 | 14 |
| CC | GO:0030119 | AP-type membrane coat adaptor complex | 0.012612319 | 0.097088579 | AP1B1/AP2M1/AP1S1/HIP1/AP5Z1/AP4B1/FCHO1/VPS41/AP5M1/VPS18/TEPSIN | 11 |
| MF | GO:0043021 | ribonucleoprotein complex binding | 2.8628E-07 | 0.000311473 | C1QBP/CSNK2B/DDX5/EEF2/EIF4B/HNRNPU/IGHMBP2/NPM1/OXA1L/PIM1/PPP1CA/RBM3/RPN2/SNRPA/SNRPD1/SNRPD3/SRP9/BAG6/GTPBP6/NEMF/MTRF1/EIF1B/BOP1/SMG6/LARP1/PES1/PRPF31/ERAL1/NMD3/SBDS/GUF1/IFIH1/SECISBP2/NAA16/ZC3H12A/UNK/CPEB2/EIF5AL1/MTIF3 | 39 |
| MF | GO:0004842 | ubiquitin-protein transferase activity | 1.86491E-06 | 0.000726171 | AMFR/BIRC2/BIRC3/BARD1/CDC34/TRIM37/RING1/RNF6/SIAH1/SIAH2/TAF1/TNFAIP1/UBA7/UBE2E1/UBE2G2/UBE2L3/UBE3A/VHL/TRIM25/RNF103/HERC1/BTRC/RNF8/RNF7/PJA2/TRIM28/TOPORS/ARIH2/TRIM3/RBCK1/MALT1/WWP2/MGRN1/ARIH1/HECTD1/RNF19A/RCHY1/RNF167/IRF2BP1/FBXL3/LRRC29/FBXO2/FBXO3/RNF11/KLHL20/RABGEF1/UHRF1/RNF138/TRIM33/ANKIB1/RC3H2/FBXL12/RNF125/RNF31/MSL2/RNF220/TRIM62/UBE2Q1/G2E3/KCMF1/RMND5B/RNF26/FBXL15/HECTD3/RNF34/FBXO11/SHARPIN/ZNRF1/TRIM47/RNF185/TMEM129/MIB2/FBXL16/AMN1/UBR1/RNF152/FBXL13/RNF214/SHPRH/RNF149/SH3RF3 | 81 |
| MF | GO:0019787 | ubiquitin-like protein transferase activity | 2.00231E-06 | 0.000726171 | AMFR/BIRC2/BIRC3/BARD1/CDC34/TRIM37/RANBP2/RING1/RNF6/SIAH1/SIAH2/TAF1/TNFAIP1/UBA7/UBE2E1/UBE2G2/UBE2L3/UBE3A/VHL/TRIM25/RNF103/HERC1/BTRC/RNF8/RNF7/HDAC4/PJA2/TRIM28/TOPORS/ARIH2/TRIM3/RBCK1/MALT1/WWP2/MGRN1/UFL1/ARIH1/HECTD1/RNF19A/RCHY1/RNF167/IRF2BP1/FBXL3/LRRC29/FBXO2/FBXO3/RNF11/KLHL20/RABGEF1/UHRF1/RNF138/TRIM33/ANKIB1/RC3H2/FBXL12/RNF125/RNF31/MSL2/RNF220/TRIM62/UBE2Q1/G2E3/KCMF1/KIAA1586/RMND5B/RNF26/FBXL15/HECTD3/RNF34/FBXO11/SHARPIN/ZNRF1/TRIM47/RNF185/TMEM129/MIB2/FBXL16/AMN1/UBR1/RNF152/FBXL13/RNF214/SHPRH/RNF149/SH3RF3 | 85 |
| MF | GO:0061630 | ubiquitin protein ligase activity | 0.000235946 | 0.058552253 | AMFR/BIRC2/BIRC3/TRIM37/RING1/RNF6/SIAH1/SIAH2/UBE3A/VHL/TRIM25/RNF103/BTRC/RNF8/RNF7/PJA2/TOPORS/ARIH2/TRIM3/WWP2/MGRN1/ARIH1/RNF19A/RNF167/IRF2BP1/FBXL3/FBXO2/RABGEF1/UHRF1/RNF138/ANKIB1/FBXL12/RNF125/MSL2/RNF220/KCMF1/RNF26/RNF34/ZNRF1/RNF185/TMEM129/MIB2/UBR1/RNF152/SHPRH/RNF149/SH3RF3 | 47 |
| MF | GO:0004674 | protein serine/threonine kinase activity | 0.000313453 | 0.058552253 | ACVRL1/GRK2/AKT2/ARAF/ATM/CAMK2D/CCNH/CHUK/CLK2/PLK3/CSNK1D/CSNK1G2/CSNK2B/MARK2/GRK6/GSK3B/IRAK1/LIMK1/MAP3K4/MAP3K10/MAP3K11/NEK1/CDK16/CDK17/CDK18/PDPK1/PHKB/PIM1/PLK1/PRKACB/PRKCB/PRKCH/PRKCI/PKN1/PRKDC/MAPK7/MAP2K2/MAP2K3/MAP2K7/RPS6KA3/SRPK1/STK4/CDKL5/TAF1/MAP3K7/TGFBR3/VRK2/MAPKAPK3/MKNK1/SQSTM1/PRPF4B/PKMYT1/AURKB/ROCK2/AATK/IKBKE/DCAF1/NUAK1/AKT3/SPEG/STK25/CAMKK2/NEK6/FASTK/MAP4K1/MAST3/MAST2/SIK3/CDK20/DAPK2/DSTYK/HIPK2/VRK3/STK26/TRPM7/OBSCN/MASTL/CSNK1A1L/NEK7/ADCK5/PIM3 | 81 |
| MF | GO:0061659 | ubiquitin-like protein ligase activity | 0.000322898 | 0.058552253 | AMFR/BIRC2/BIRC3/TRIM37/RING1/RNF6/SIAH1/SIAH2/UBE3A/VHL/TRIM25/RNF103/BTRC/RNF8/RNF7/PJA2/TOPORS/ARIH2/TRIM3/WWP2/MGRN1/ARIH1/RNF19A/RNF167/IRF2BP1/FBXL3/FBXO2/RABGEF1/UHRF1/RNF138/ANKIB1/FBXL12/RNF125/MSL2/RNF220/KCMF1/KIAA1586/RNF26/RNF34/ZNRF1/RNF185/TMEM129/MIB2/UBR1/RNF152/SHPRH/RNF149/SH3RF3 | 48 |
| MF | GO:0043024 | ribosomal small subunit binding | 0.000560618 | 0.078593095 | EIF4B/NPM1/PIM1/EIF1B/LARP1/ERAL1/CPEB2/MTIF3 | 8 |
| MF | GO:0004386 | helicase activity | 0.00057789 | 0.078593095 | ATRX/DDX5/DHX15/IGHMBP2/MCM6/MOV10/NBN/RAD51/RECQL/UPF1/RFC3/RFC5/SMARCA4/RUVBL1/BTAF1/RECQL5/DDX23/CHD1L/DHX34/AQR/DDX42/DICER1/DDX58/DDX56/FANCM/IFIH1/DDX31/YTHDC2/DDX50/DDX54/DHX40/DDX59/BRIP1/CHD6/MCM8/SHPRH | 36 |
| MF | GO:0030371 | translation repressor activity | 0.000822432 | 0.099422908 | EIF4EBP1/EIF4EBP2/PURA/RARA/RBM3/TYMS/PAIP2/CELF4/CPEB2/PAIP2B | 10 |
| KEGG | hsa03040 | Spliceosome | 9.52601E-07 | 0.00030388 | DDX5/DHX15/HNRNPA1/HNRNPK/HNRNPU/HSPA1B/MAGOH/SNU13/SRSF1/SRSF7/SNRPA/SNRPA1/SNRPD1/SNRPD3/SNRPE/SNRPF/PRPF3/DDX23/AQR/THOC1/ALYREF/SF3A1/USP39/SRSF10/DDX42/U2AF2/SNW1/ACIN1/SF3B1/SYF2/PRPF31/SF3B6/LSM7/PRPF38B/PRPF40A/THOC2/LSM2/PHF5A/RBM17/U2AF1L4/ISY1-RAB43 | 41 |
| KEGG | hsa05135 | Yersinia infection | 2.49968E-05 | 0.003986987 | ACTB/AKT2/RHOA/CHUK/GSK3B/IRAK1/IRF3/ITGA4/LCP2/LIMK1/MYD88/PIK3CB/PIK3R1/PKN1/MAP2K2/MAP2K3/MAP2K7/PXN/RAC1/RELA/RPS6KA3/MAP3K7/TNF/WAS/PIK3R3/ARHGEF1/ROCK2/AKT3/ACTR2/VAV3/BAIAP2/PIP5K1C/PYCARD/ELMO2/WIPF2 | 35 |
| KEGG | hsa05132 | Salmonella infection | 0.000131685 | 0.014002495 | ACTB/AKT2/BIRC2/BIRC3/RHOA/CHUK/IRAK1/KLC1/KPNA3/MYD88/MYO6/PIK3C3/PIK3CB/PKN1/MAP2K2/MAP2K3/MAP2K7/PTPRC/RAB5A/RAB5B/RAC1/RELA/RPS3/MAP3K7/DYNLT1/TNF/TUBA4A/TUBA1A/RAB7A/STX10/ROCK2/PLEKHM1/AKT3/ACTR2/TUBB3/TUBB4B/DCTN2/DCTN3/TXN2/VPS41/PYCARD/FHOD1/TLR9/VPS11/ACTR10/VPS18/ELMO2/KLC2/TCF7L1/TIRAP/DYNLL2/TUBB | 52 |
| KEGG | hsa04611 | Platelet activation | 0.000265285 | 0.01764411 | ACTB/ADCY3/AKT2/RHOA/FCER1G/GNAI3/LCP2/P2RX1/PIK3CB/PIK3R1/PLCB2/PLCB3/PLCG2/PPP1CA/PPP1CC/PRKACB/PRKCI/PTGIR/RAP1A/STIM1/TBXAS1/TLN1/PIK3R3/VAMP8/ARHGEF1/ROCK2/AKT3/RASGRP1/ORAI1/PLA2G4B | 30 |
| KEGG | hsa04310 | Wnt signaling pathway | 0.000317997 | 0.01764411 | RHOA/CAMK2D/CSNK2B/DVL3/GSK3B/LRP5/ROR2/PLCB2/PLCB3/PPARD/PPP3CC/PPP3R1/PRKACB/PRKCB/RAC1/SIAH1/MAP3K7/WNT6/WNT10B/WNT11/FZD5/FZD3/FOSL1/CUL1/RUVBL1/BTRC/ROCK2/FZD10/CTNNBIP1/SENP2/SOX17/PORCN/TBL1XR1/TCF7L1/CSNK1A1L/RSPO4 | 36 |
| KEGG | hsa04662 | B cell receptor signaling pathway | 0.00037311 | 0.01764411 | AKT2/CHUK/GSK3B/INPPL1/NFKBIB/PIK3CB/PIK3R1/PLCG2/PPP3CC/PPP3R1/PRKCB/MAP2K2/PTPN6/RAC1/RELA/PIK3R3/AKT3/VAV3/LILRB1/MALT1/LILRB4/LILRB3 | 22 |
| KEGG | hsa04660 | T cell receptor signaling pathway | 0.000387175 | 0.01764411 | AKT2/RHOA/CD3D/CHUK/GSK3B/IFNG/LCP2/NCK1/NFKBIB/PDPK1/PIK3CB/PIK3R1/PPP3CC/PPP3R1/MAP2K2/MAP2K7/PTPN6/PTPRC/RELA/MAP3K7/TNF/PIK3R3/AKT3/RASGRP1/VAV3/MALT1 | 26 |
| KEGG | hsa04380 | Osteoclast differentiation | 0.000474918 | 0.018937365 | AKT2/CHUK/CYBA/CYLD/FCGR3A/FCGR3B/IFNG/JUND/LCP2/NFKB2/PIK3CB/PIK3R1/PLCG2/PPP3CC/PPP3R1/MAP2K7/RAC1/RELA/MAP3K7/TNF/FOSL1/PIK3R3/SQSTM1/AKT3/LILRB1/LILRB4/LILRB3/TREM2/SIRPG/OSCAR | 30 |
| KEGG | hsa04666 | Fc gamma R-mediated phagocytosis | 0.000750851 | 0.026613511 | AKT2/BIN1/CFL1/FCGR3A/FCGR3B/HCK/INPPL1/LIMK1/PIK3CB/PIK3R1/PLCG2/PRKCB/PTPRC/RAC1/WAS/PIK3R3/SPHK1/AKT3/ACTR2/VAV3/PIP5K1C/ASAP1/MARCKSL1/PLA2G4B | 24 |
| KEGG | hsa04150 | mTOR signaling pathway | 0.001522749 | 0.045304249 | AKT2/RHOA/CHUK/DVL3/EIF4B/EIF4EBP1/GSK3B/LRP5/PDPK1/PIK3CB/PIK3R1/PRKCB/MAP2K2/RHEB/RPS6KA3/TNF/WNT6/WNT10B/WNT11/FZD5/FZD3/NPRL3/PIK3R3/ATP6V1F/AKT3/RRAGB/FZD10/ATP6V1H/MLST8/SEH1L/WDR24/FLCN/RNF152 | 33 |
| KEGG | hsa04931 | Insulin resistance | 0.001644033 | 0.045304249 | AKT2/CD36/GSK3B/PCK2/PDPK1/PIK3CB/PIK3R1/PPP1CA/PPP1CC/PRKCB/RELA/RPS6KA3/MLX/TNF/NR1H2/PIK3R3/CREB5/AKT3/SLC27A5/SLC27A2/MLXIP/MLXIPL/CREB3L2/PPP1R3B/G6PC3 | 25 |
| KEGG | hsa04218 | Cellular senescence | 0.001704235 | 0.045304249 | AKT2/SLC25A6/ATM/CAPN1/CCNB1/CDKN2B/EIF4EBP1/ETS1/NBN/PIK3CB/PIK3R1/PPID/PPP1CA/PPP1CC/PPP3CC/PPP3R1/MAP2K2/MAP2K3/RAD1/RBL1/RELA/RHEB/VDAC2/VDAC3/PIK3R3/SQSTM1/BTRC/AKT3/HIPK2/TRPM7/RASSF5/CCNB3/LIN9 | 33 |
| KEGG | hsa04620 | Toll-like receptor signaling pathway | 0.002108809 | 0.051746923 | AKT2/CHUK/IRAK1/IRF3/IRF7/MYD88/PIK3CB/PIK3R1/MAP2K2/MAP2K3/MAP2K7/RAC1/RELA/CCL4/CCL5/MAP3K7/TNF/PIK3R3/IKBKE/AKT3/TLR9/TOLLIP/TIRAP/CCL4L1 | 24 |
| KEGG | hsa05221 | Acute myeloid leukemia | 0.003198496 | 0.072880018 | AKT2/ARAF/RUNX1/CHUK/EIF4EBP1/JUP/PIK3CB/PIM1/PIK3R1/PPARD/MAP2K2/RARA/RELA/STAT5A/PIK3R3/AKT3/TCF7L1 | 17 |

Supplementary Table 2. Topological result exploration for hub genes identification.

| node_name | Degree | MCC | DMNC | MNC | EPC | BottleNeck | EcCentricity | Closeness | Radiality | Betweenness | Stress | ClusteringCoefficient |
| --- | --- | --- | --- | --- | --- | --- | --- | --- | --- | --- | --- | --- |
| RAC1 | 77 | 48141 | 0.1521 | 74 | 98.48 | 47 | 0.13026 | 433.22619 | 9.22784 | 97521.68778 | 1037714 | 0.07826 |
| CUL1 | 74 | 9.22E+13 | 0.81499 | 74 | 204.648 | 5 | 0.13026 | 405.05476 | 9.04274 | 28872.41443 | 586080 | 0.45428 |
| BTRC | 71 | 9.22E+13 | 0.89062 | 70 | 207.188 | 33 | 0.13026 | 395.3381 | 8.98961 | 17820.8118 | 472518 | 0.49095 |
| NHP2L1 | 70 | 9.22E+13 | 0.78623 | 70 | 212.45 | 14 | 0.11398 | 375.24048 | 8.76422 | 18402.93199 | 814054 | 0.44596 |
| MAGOH | 65 | 9.22E+13 | 0.74606 | 65 | 208.705 | 1 | 0.11398 | 374.41071 | 8.7985 | 24377.15177 | 2219770 | 0.43317 |
| ANAPC10 | 64 | 9.22E+13 | 0.87933 | 63 | 203.507 | 2 | 0.13026 | 390.44286 | 8.96647 | 20923.83199 | 540956 | 0.4995 |
| PLK1 | 64 | 9.22E+13 | 0.50273 | 61 | 194.121 | 21 | 0.13026 | 414.49286 | 9.14472 | 46547.2411 | 1380958 | 0.27034 |
| SRSF1 | 59 | 9.22E+13 | 1.00501 | 58 | 203.922 | 4 | 0.11398 | 360.96071 | 8.68967 | 9332.6841 | 455530 | 0.58445 |
| ALYREF | 57 | 9.22E+13 | 1.04972 | 56 | 206.035 | 3 | 0.11398 | 358.57738 | 8.67681 | 8375.54813 | 412846 | 0.61654 |
| SNRPE | 57 | 9.22E+13 | 1.00101 | 57 | 205.027 | 12 | 0.13026 | 364.75476 | 8.75737 | 6654.53242 | 449444 | 0.60589 |
| RHOA | 57 | 6894 | 0.18041 | 53 | 83.014 | 60 | 0.13026 | 406.25238 | 9.10444 | 54409.83187 | 775300 | 0.09649 |
| FBXW5 | 56 | 9.22E+13 | 1.1628 | 56 | 199.16 | 1 | 0.11398 | 357.83452 | 8.72909 | 5709.75893 | 137864 | 0.70779 |
| SRSF7 | 56 | 9.22E+13 | 1.06039 | 56 | 206.658 | 2 | 0.11398 | 357.91071 | 8.6751 | 2795.90751 | 316830 | 0.64545 |
| SNRPF | 56 | 9.22E+13 | 1.02626 | 56 | 205.756 | 1 | 0.13026 | 362.87143 | 8.74537 | 5732.81993 | 408766 | 0.62468 |
| SF3B1 | 56 | 9.22E+13 | 0.97018 | 55 | 200.811 | 9 | 0.11398 | 386.77619 | 8.9339 | 33531.21868 | 489546 | 0.57273 |
| FBXL3 | 55 | 9.22E+13 | 1.17258 | 55 | 202.26 | 1 | 0.11398 | 366.08452 | 8.79422 | 8493.48219 | 186632 | 0.71785 |
| CPSF2 | 55 | 9.22E+13 | 1.05598 | 55 | 208.708 | 1 | 0.11398 | 361.02738 | 8.70681 | 5432.33972 | 314326 | 0.64646 |
| SNRPD3 | 55 | 9.22E+13 | 1.05268 | 55 | 206.731 | 1 | 0.13026 | 362.37143 | 8.74451 | 5113.99401 | 383644 | 0.64444 |
| SNRPD1 | 54 | 9.22E+13 | 1.08263 | 54 | 205.306 | 1 | 0.13026 | 361.5381 | 8.74194 | 4635.9246 | 353290 | 0.66667 |
| SNW1 | 54 | 9.22E+13 | 0.97482 | 54 | 198.78 | 7 | 0.11398 | 376.52024 | 8.83021 | 22188.25416 | 383588 | 0.60028 |
| PIK3R1 | 54 | 4.00E+07 | 0.24172 | 54 | 87.595 | 33 | 0.11398 | 398.62738 | 9.03074 | 53370.7595 | 808674 | 0.14885 |
| VAMP8 | 53 | 9.22E+13 | 0.51547 | 52 | 81.782 | 28 | 0.11398 | 373.66071 | 8.83449 | 46746.93815 | 383074 | 0.30914 |
| KBTBD7 | 52 | 9.22E+13 | 1.36718 | 50 | 202.645 | 1 | 0.11398 | 342.04405 | 8.57997 | 770.4749 | 17682 | 0.79789 |
| HIST1H2BL | 52 | 429230 | 0.24322 | 52 | 126.79 | 9 | 0.13026 | 396.83571 | 9.03417 | 34867.48074 | 687692 | 0.15158 |
| KLHL20 | 51 | 9.22E+13 | 1.36718 | 50 | 198.76 | 1 | 0.13026 | 369.50476 | 8.84049 | 14305.01727 | 102592 | 0.82902 |
| FBXO2 | 51 | 9.22E+13 | 1.32317 | 51 | 195.878 | 2 | 0.11398 | 340.29405 | 8.56969 | 457.96647 | 15844 | 0.8298 |
| KBTBD13 | 50 | 9.22E+13 | 1.36718 | 50 | 201.915 | 1 | 0.11398 | 339.79405 | 8.56883 | 154.55344 | 12040 | 0.86286 |
| FBXL13 | 50 | 9.22E+13 | 1.36718 | 50 | 200.969 | 1 | 0.11398 | 339.79405 | 8.56883 | 154.55344 | 12040 | 0.86286 |
| ASB18 | 50 | 9.22E+13 | 1.36718 | 50 | 199.934 | 1 | 0.11398 | 339.79405 | 8.56883 | 154.55344 | 12040 | 0.86286 |
| FBXO11 | 50 | 9.22E+13 | 1.36718 | 50 | 199.7 | 1 | 0.11398 | 339.79405 | 8.56883 | 154.55344 | 12040 | 0.86286 |
| BTBD1 | 50 | 9.22E+13 | 1.36718 | 50 | 199.394 | 1 | 0.11398 | 339.79405 | 8.56883 | 154.55344 | 12040 | 0.86286 |
| SPSB2 | 50 | 9.22E+13 | 1.36718 | 50 | 199.356 | 1 | 0.11398 | 339.79405 | 8.56883 | 154.55344 | 12040 | 0.86286 |
| RNF7 | 50 | 9.22E+13 | 1.36718 | 50 | 199.049 | 1 | 0.11398 | 339.79405 | 8.56883 | 154.55344 | 12040 | 0.86286 |
| KBTBD6 | 50 | 9.22E+13 | 1.36718 | 50 | 198.91 | 1 | 0.11398 | 339.79405 | 8.56883 | 154.55344 | 12040 | 0.86286 |
| FBXL16 | 50 | 9.22E+13 | 1.36718 | 50 | 198.257 | 1 | 0.11398 | 339.79405 | 8.56883 | 154.55344 | 12040 | 0.86286 |
| FBXL19 | 50 | 9.22E+13 | 1.36718 | 50 | 198.1 | 1 | 0.11398 | 339.79405 | 8.56883 | 154.55344 | 12040 | 0.86286 |
| SPSB4 | 50 | 9.22E+13 | 1.36718 | 50 | 198.07 | 1 | 0.11398 | 339.79405 | 8.56883 | 154.55344 | 12040 | 0.86286 |
| FBXL15 | 50 | 9.22E+13 | 1.36718 | 50 | 197.608 | 1 | 0.11398 | 339.79405 | 8.56883 | 154.55344 | 12040 | 0.86286 |
| GAN | 50 | 9.22E+13 | 1.36718 | 50 | 197.338 | 1 | 0.11398 | 339.79405 | 8.56883 | 154.55344 | 12040 | 0.86286 |
| FBXL12 | 50 | 9.22E+13 | 1.36718 | 50 | 196.949 | 1 | 0.11398 | 339.79405 | 8.56883 | 154.55344 | 12040 | 0.86286 |
| ASB8 | 50 | 9.22E+13 | 1.36718 | 50 | 195.759 | 1 | 0.11398 | 339.79405 | 8.56883 | 154.55344 | 12040 | 0.86286 |
| HNRNPK | 50 | 9.22E+13 | 1.26538 | 46 | 200.194 | 3 | 0.11398 | 348.74762 | 8.59026 | 6021.79982 | 200952 | 0.69796 |
| PPP2R5D | 50 | 9.22E+13 | 0.54459 | 47 | 180.593 | 28 | 0.13026 | 402.01905 | 9.10273 | 44521.76991 | 1124072 | 0.30939 |
| RBCK1 | 49 | 9.22E+13 | 1.1847 | 49 | 196.846 | 1 | 0.13026 | 348.5381 | 8.65796 | 3562.76537 | 77990 | 0.75255 |
| DHX15 | 49 | 9.22E+13 | 1.1258 | 49 | 204.367 | 1 | 0.11398 | 344.92381 | 8.56541 | 2693.65734 | 249736 | 0.71514 |
| RPS3 | 49 | 9.22E+13 | 0.63913 | 48 | 178.142 | 13 | 0.11398 | 381.85833 | 8.91419 | 37315.06505 | 1336674 | 0.39201 |
| GNB2 | 49 | 1.04E+09 | 0.33198 | 49 | 74.696 | 15 | 0.11398 | 371.70119 | 8.84649 | 21472.12059 | 496304 | 0.21088 |
| GNG4 | 49 | 1.04E+09 | 0.33198 | 49 | 74.636 | 12 | 0.11398 | 371.70119 | 8.84649 | 21472.12059 | 496304 | 0.21088 |
| AQR | 48 | 9.22E+13 | 1.46446 | 41 | 201.179 | 1 | 0.11398 | 356.025 | 8.65624 | 12263.00243 | 339202 | 0.73404 |
| HNRNPA1 | 48 | 9.22E+13 | 1.22138 | 47 | 193.243 | 2 | 0.11398 | 342.89048 | 8.5457 | 4956.00579 | 182764 | 0.75355 |
| RELA | 48 | 1.00E+11 | 0.3906 | 44 | 149.715 | 31 | 0.13026 | 405.5619 | 9.12244 | 51756.50229 | 965782 | 0.21543 |
| HNRNPA2B1 | 47 | 9.22E+13 | 1.22138 | 47 | 198.459 | 2 | 0.11398 | 342.39048 | 8.54484 | 2830.00579 | 143462 | 0.78631 |
| RPS11 | 47 | 9.22E+13 | 0.69454 | 46 | 175.207 | 3 | 0.11398 | 354.86548 | 8.65967 | 10104.11592 | 610790 | 0.43108 |
| CCNB1 | 47 | 9.22E+13 | 0.63521 | 38 | 171.648 | 16 | 0.11398 | 394.31548 | 9.04017 | 36118.76647 | 908862 | 0.28862 |
| H2AFX | 47 | 424164 | 0.26727 | 47 | 128.169 | 36 | 0.11398 | 389.39167 | 8.97161 | 25593.00342 | 588258 | 0.17206 |
| RCHY1 | 46 | 9.22E+13 | 1.49789 | 42 | 192.321 | 3 | 0.11398 | 342.55119 | 8.58512 | 7465.92847 | 117504 | 0.83478 |
| PCBP2 | 46 | 9.22E+13 | 1.43874 | 42 | 200.595 | 1 | 0.11398 | 351.02381 | 8.65282 | 10021.97266 | 206566 | 0.80483 |
| PRPF31 | 46 | 9.22E+13 | 1.14018 | 46 | 197.426 | 1 | 0.11398 | 349.03571 | 8.60825 | 5777.03207 | 165306 | 0.73913 |
| NUP43 | 46 | 9.22E+13 | 0.7169 | 46 | 192.957 | 1 | 0.11398 | 380.94167 | 8.93733 | 17047.21327 | 1109896 | 0.46473 |
| NUP133 | 46 | 9.22E+13 | 0.7169 | 46 | 192.088 | 1 | 0.11398 | 380.94167 | 8.93733 | 17047.21327 | 1109896 | 0.46473 |
| NUP107 | 46 | 9.22E+13 | 0.7169 | 46 | 189.55 | 1 | 0.11398 | 380.94167 | 8.93733 | 17047.21327 | 1109896 | 0.46473 |
| NUP160 | 46 | 9.22E+13 | 0.7169 | 46 | 185.584 | 22 | 0.11398 | 380.94167 | 8.93733 | 17047.21327 | 1109896 | 0.46473 |
| RANBP2 | 46 | 9.22E+13 | 0.71392 | 46 | 186.297 | 3 | 0.11398 | 380.775 | 8.93647 | 16840.37207 | 1069812 | 0.4628 |
| VPRBP | 45 | 9.22E+13 | 1.3414 | 45 | 191.626 | 4 | 0.11398 | 332.52738 | 8.50627 | 360.98402 | 18804 | 0.87576 |
| MIB2 | 45 | 9.22E+13 | 1.3383 | 45 | 190.972 | 2 | 0.11398 | 336.59405 | 8.53884 | 2279.54854 | 30234 | 0.87374 |
| LSM2 | 45 | 9.22E+13 | 1.28879 | 45 | 198.72 | 4 | 0.11398 | 340.09048 | 8.53284 | 2456.39135 | 107094 | 0.84141 |
| PAFAH1B1 | 45 | 9.22E+13 | 0.71676 | 42 | 168.985 | 13 | 0.13026 | 395.80238 | 9.08901 | 38992.17606 | 728668 | 0.41717 |
| HNRNPF | 44 | 9.22E+13 | 1.39904 | 43 | 196.604 | 2 | 0.11398 | 339.34048 | 8.53027 | 2255.95425 | 54862 | 0.88478 |
| CDC34 | 44 | 9.22E+13 | 1.39524 | 44 | 195.227 | 1 | 0.11398 | 345.87738 | 8.63653 | 1270.99302 | 26268 | 0.91755 |
| HNRNPD | 44 | 9.22E+13 | 1.33255 | 44 | 198.368 | 1 | 0.11398 | 340.09048 | 8.53541 | 2290.60327 | 77840 | 0.87632 |
| RPL5 | 44 | 9.22E+13 | 0.74047 | 43 | 166.038 | 10 | 0.13026 | 355.34286 | 8.71966 | 13559.26796 | 850824 | 0.46829 |
| AURKB | 44 | 9.22E+13 | 0.6924 | 42 | 183.457 | 21 | 0.13026 | 380.66905 | 8.97161 | 28862.32967 | 928566 | 0.42072 |
| CSNK1D | 44 | 4.32E+13 | 0.55456 | 28 | 163.642 | 52 | 0.13026 | 391.0119 | 9.00332 | 41325.30708 | 923000 | 0.29598 |
| RBBP7 | 44 | 4049166 | 0.29923 | 42 | 137.87 | 14 | 0.11398 | 356.93452 | 8.72309 | 15165.23414 | 323078 | 0.18288 |
| ACTB | 44 | 123232 | 0.217 | 44 | 135.214 | 9 | 0.11398 | 418.74405 | 9.2347 | 73530.57377 | 938192 | 0.14271 |
| SIAH1 | 43 | 9.22E+13 | 1.4425 | 43 | 194.086 | 1 | 0.11398 | 338.44405 | 8.56198 | 566.02642 | 7788 | 0.9557 |
| DDX42 | 43 | 9.22E+13 | 1.42482 | 42 | 194.136 | 2 | 0.11398 | 338.84048 | 8.52941 | 2165.02665 | 40876 | 0.90698 |
| SRRM2 | 43 | 9.22E+13 | 1.38399 | 43 | 197.913 | 2 | 0.11398 | 338.84048 | 8.52941 | 740.73882 | 20020 | 0.91694 |
| PHF5A | 43 | 9.22E+13 | 1.37062 | 43 | 196.977 | 1 | 0.11398 | 338.84048 | 8.52941 | 431.7759 | 18030 | 0.90808 |
| DDX23 | 43 | 9.22E+13 | 1.37062 | 43 | 196.681 | 1 | 0.11398 | 338.84048 | 8.52941 | 706.91157 | 13648 | 0.90808 |
| RNF6 | 42 | 9.22E+13 | 1.49789 | 42 | 196.128 | 1 | 0.11398 | 330.27738 | 8.49685 | 0 | 0 | 1 |
| HECTD3 | 42 | 9.22E+13 | 1.49789 | 42 | 194.353 | 1 | 0.11398 | 330.27738 | 8.49685 | 0 | 0 | 1 |
| RNF34 | 42 | 9.22E+13 | 1.49789 | 42 | 193.616 | 1 | 0.11398 | 330.27738 | 8.49685 | 0 | 0 | 1 |
| RNF220 | 42 | 9.22E+13 | 1.49789 | 42 | 192.93 | 1 | 0.11398 | 330.27738 | 8.49685 | 0 | 0 | 1 |
| MEX3C | 42 | 9.22E+13 | 1.49789 | 42 | 192.764 | 1 | 0.11398 | 330.27738 | 8.49685 | 0 | 0 | 1 |
| TRIM37 | 42 | 9.22E+13 | 1.49789 | 42 | 192.552 | 1 | 0.11398 | 330.27738 | 8.49685 | 0 | 0 | 1 |
| MGRN1 | 42 | 9.22E+13 | 1.49789 | 42 | 191.767 | 1 | 0.11398 | 330.27738 | 8.49685 | 0 | 0 | 1 |
| PJA2 | 42 | 9.22E+13 | 1.49789 | 42 | 191.547 | 1 | 0.11398 | 330.27738 | 8.49685 | 0 | 0 | 1 |
| SIAH2 | 42 | 9.22E+13 | 1.49789 | 42 | 190.508 | 1 | 0.11398 | 330.27738 | 8.49685 | 0 | 0 | 1 |
| RNF19A | 42 | 9.22E+13 | 1.49789 | 42 | 190.4 | 1 | 0.11398 | 330.27738 | 8.49685 | 0 | 0 | 1 |
| HERC1 | 42 | 9.22E+13 | 1.49789 | 42 | 189.93 | 1 | 0.11398 | 330.27738 | 8.49685 | 0 | 0 | 1 |
| HECTD1 | 42 | 9.22E+13 | 1.49789 | 42 | 189.907 | 1 | 0.11398 | 330.27738 | 8.49685 | 0 | 0 | 1 |
| ARIH2 | 42 | 9.22E+13 | 1.49789 | 42 | 189.632 | 1 | 0.11398 | 330.27738 | 8.49685 | 0 | 0 | 1 |
| RNF138 | 42 | 9.22E+13 | 1.49789 | 42 | 189.225 | 1 | 0.11398 | 330.27738 | 8.49685 | 0 | 0 | 1 |
| DDX5 | 42 | 9.22E+13 | 1.43874 | 42 | 198.504 | 1 | 0.11398 | 338.34048 | 8.52856 | 49.14047 | 6980 | 0.96051 |
| RBM5 | 42 | 9.22E+13 | 1.43874 | 42 | 196.552 | 1 | 0.11398 | 338.34048 | 8.52856 | 49.14047 | 6980 | 0.96051 |
| HNRNPUL1 | 42 | 9.22E+13 | 1.43874 | 42 | 196.359 | 1 | 0.11398 | 338.34048 | 8.52856 | 49.14047 | 6980 | 0.96051 |
| HNRNPU | 42 | 9.22E+13 | 1.43874 | 42 | 196.053 | 1 | 0.11398 | 338.34048 | 8.52856 | 49.14047 | 6980 | 0.96051 |
| SNRPA1 | 42 | 9.22E+13 | 1.42482 | 42 | 193.837 | 1 | 0.11398 | 338.34048 | 8.52856 | 38.49091 | 1228 | 0.95122 |
| SF3B6 | 42 | 9.22E+13 | 1.42482 | 42 | 193.354 | 1 | 0.11398 | 338.34048 | 8.52856 | 39.02665 | 1218 | 0.95122 |
| LSM7 | 42 | 9.22E+13 | 1.31348 | 42 | 194.38 | 1 | 0.11398 | 336.12381 | 8.51313 | 2082.83078 | 89408 | 0.87689 |
| RPS15A | 42 | 9.22E+13 | 0.74286 | 42 | 170.058 | 2 | 0.13026 | 355.80952 | 8.70252 | 6514.30083 | 312692 | 0.49593 |
| CCNH | 42 | 376857 | 0.32366 | 30 | 111.758 | 33 | 0.11398 | 372.34167 | 8.85249 | 37324.47781 | 557036 | 0.1475 |
| SF3A1 | 41 | 9.22E+13 | 1.46446 | 41 | 197.743 | 1 | 0.11398 | 337.84048 | 8.5277 | 5.66667 | 300 | 0.98537 |
| PRCC | 41 | 9.22E+13 | 1.46446 | 41 | 197.402 | 1 | 0.11398 | 337.84048 | 8.5277 | 5.66667 | 300 | 0.98537 |
| RBM17 | 41 | 9.22E+13 | 1.46446 | 41 | 196.826 | 1 | 0.11398 | 337.84048 | 8.5277 | 5.66667 | 300 | 0.98537 |
| CWC22 | 41 | 9.22E+13 | 1.46446 | 41 | 196.005 | 1 | 0.11398 | 337.84048 | 8.5277 | 5.66667 | 300 | 0.98537 |
| RPL23 | 41 | 9.22E+13 | 0.76123 | 41 | 164.639 | 15 | 0.13026 | 348.99286 | 8.66224 | 9588.45062 | 552582 | 0.5122 |
| SNRPA | 40 | 9.22E+13 | 1.43652 | 40 | 195.914 | 1 | 0.11398 | 334.87381 | 8.5097 | 36.95437 | 4304 | 0.97436 |
| PRPF40A | 40 | 9.22E+13 | 1.43652 | 40 | 192.687 | 1 | 0.11398 | 334.87381 | 8.5097 | 36.95437 | 4304 | 0.97436 |
| PRPF3 | 40 | 9.22E+13 | 1.4214 | 40 | 196.713 | 1 | 0.11398 | 334.87381 | 8.5097 | 30.63654 | 874 | 0.9641 |
| COPS5 | 40 | 9.22E+13 | 0.92547 | 39 | 182.5 | 12 | 0.11398 | 363.17619 | 8.81393 | 15176.28499 | 286052 | 0.60128 |
| RPL30 | 40 | 9.22E+13 | 0.79765 | 40 | 165.945 | 1 | 0.11398 | 348.80119 | 8.66824 | 6046.50876 | 333136 | 0.54103 |
| RPS29 | 40 | 9.22E+13 | 0.76929 | 40 | 169.16 | 1 | 0.11398 | 344.23214 | 8.58083 | 2784.86107 | 220450 | 0.52179 |
| DYNLL2 | 40 | 9.22E+13 | 0.71862 | 37 | 156.803 | 4 | 0.13026 | 376.15238 | 8.95361 | 20342.58854 | 507160 | 0.42692 |
| USP39 | 39 | 9.22E+13 | 1.46221 | 39 | 188.1 | 1 | 0.11398 | 334.37381 | 8.50885 | 0 | 0 | 1 |
| GPS1 | 39 | 9.22E+13 | 0.92547 | 39 | 180.559 | 3 | 0.11398 | 358.60952 | 8.76337 | 3066.16021 | 104352 | 0.63293 |
| COPS7B | 39 | 9.22E+13 | 0.92547 | 39 | 176.508 | 1 | 0.11398 | 358.60952 | 8.76337 | 3066.16021 | 104352 | 0.63293 |
| COPS6 | 39 | 9.22E+13 | 0.92547 | 39 | 174.814 | 1 | 0.11398 | 358.60952 | 8.76337 | 3066.16021 | 104352 | 0.63293 |
| RPS21 | 39 | 9.22E+13 | 0.79523 | 39 | 168.408 | 5 | 0.11398 | 343.73214 | 8.57997 | 2074.59857 | 146242 | 0.54386 |
| ACTR2 | 39 | 1.40E+12 | 0.45583 | 39 | 80.232 | 14 | 0.13026 | 381.34286 | 8.97161 | 32295.89484 | 287740 | 0.31174 |
| TNFRSF1B | 38 | 9.22E+13 | 1.24323 | 24 | 113.646 | 16 | 0.13026 | 362.3381 | 8.82164 | 42604.0173 | 1145132 | 0.50498 |
| RAP1A | 38 | 9.22E+13 | 1.24323 | 24 | 72.318 | 10 | 0.11398 | 358.95595 | 8.73766 | 26126.98567 | 243588 | 0.42674 |
| NDE1 | 38 | 9.22E+13 | 0.81051 | 38 | 166.728 | 1 | 0.11398 | 366.24167 | 8.85849 | 3854.51684 | 161650 | 0.55903 |
| RAB37 | 38 | 9.22E+13 | 0.72389 | 38 | 74.482 | 11 | 0.11398 | 340.27619 | 8.56883 | 10443.34449 | 147996 | 0.49929 |
| B2M | 38 | 408536 | 0.42792 | 24 | 60.199 | 30 | 0.11398 | 380.21071 | 8.9459 | 44331.09598 | 400972 | 0.16074 |
| RPL35A | 37 | 9.22E+13 | 0.86321 | 37 | 162.889 | 4 | 0.11398 | 331.08452 | 8.47114 | 1472.32902 | 156198 | 0.6006 |
| RPL19 | 37 | 9.22E+13 | 0.85458 | 37 | 160.795 | 1 | 0.11398 | 346.13452 | 8.65967 | 3895.21714 | 205884 | 0.59459 |
| GSK3B | 37 | 1.29E+10 | 0.49589 | 25 | 143.97 | 6 | 0.13026 | 393.70476 | 9.06159 | 22729.54024 | 453328 | 0.22222 |
| RPL34 | 36 | 9.22E+13 | 0.87724 | 36 | 167.389 | 1 | 0.11398 | 329.48452 | 8.45743 | 1390.43356 | 148938 | 0.61587 |
| RPL18A | 36 | 9.22E+13 | 0.87724 | 36 | 163.133 | 1 | 0.11398 | 345.21786 | 8.65624 | 3506.52817 | 195004 | 0.61587 |
| RPL24 | 36 | 9.22E+13 | 0.87724 | 36 | 156.157 | 1 | 0.11398 | 342.96786 | 8.6451 | 3088.63961 | 128702 | 0.61587 |
| KIF2A | 36 | 9.22E+13 | 0.76419 | 36 | 159.666 | 6 | 0.13026 | 365.05238 | 8.86963 | 7565.76439 | 374536 | 0.53651 |
| KIF2B | 36 | 9.22E+13 | 0.76419 | 36 | 158.901 | 1 | 0.13026 | 365.05238 | 8.86963 | 7565.76439 | 374536 | 0.53651 |
| PPP1CC | 36 | 9.22E+13 | 0.64662 | 36 | 151.837 | 14 | 0.11398 | 371.10833 | 8.88591 | 15483.16027 | 332994 | 0.45397 |
| PSMC1 | 36 | 2.19E+11 | 0.80102 | 32 | 149.919 | 3 | 0.15197 | 395.28333 | 9.10701 | 18643.28084 | 576168 | 0.46349 |
| BOP1 | 36 | 1.40E+10 | 0.64436 | 36 | 159.554 | 1 | 0.11398 | 323.81071 | 8.40172 | 1959.52049 | 167198 | 0.45238 |
| RPA2 | 36 | 4.03E+07 | 0.37375 | 34 | 84.341 | 13 | 0.11398 | 355.19881 | 8.67681 | 21988.24741 | 373670 | 0.23968 |
| SYF2 | 35 | 9.22E+13 | 1.41124 | 35 | 187.44 | 1 | 0.11398 | 333.49048 | 8.51056 | 0 | 0 | 1 |
| RPL28 | 35 | 9.22E+13 | 0.90841 | 35 | 151.331 | 1 | 0.11398 | 327.41786 | 8.45571 | 740.62965 | 55722 | 0.6437 |
| RPL7 | 35 | 9.22E+13 | 0.9013 | 35 | 158.169 | 1 | 0.11398 | 329.33452 | 8.46514 | 913.06127 | 93086 | 0.63866 |
| GPR84 | 34 | 9.22E+13 | 1.19349 | 25 | 77.186 | 1 | 0.11398 | 346.83214 | 8.65282 | 18062.14126 | 243308 | 0.57041 |
| CKAP4 | 34 | 9.22E+13 | 1.084 | 27 | 73.184 | 10 | 0.11398 | 332.92857 | 8.50542 | 10109.26284 | 102556 | 0.5615 |
| TUBB4B | 34 | 2.35E+13 | 0.64534 | 34 | 113.806 | 16 | 0.13026 | 370.34524 | 8.93133 | 8267.13191 | 208454 | 0.46168 |
| PSMA5 | 34 | 2.19E+11 | 0.77068 | 33 | 152.859 | 1 | 0.15197 | 391.7 | 9.0873 | 7407.31723 | 312806 | 0.52406 |
| PES1 | 34 | 6.83E+09 | 0.60547 | 34 | 144.22 | 1 | 0.11398 | 321.84405 | 8.3923 | 1771.27845 | 165946 | 0.43316 |
| DCUN1D4 | 33 | 9.22E+13 | 1.15078 | 33 | 176.634 | 1 | 0.11398 | 331.26905 | 8.54312 | 390.43905 | 23404 | 0.83144 |
| COMMD1 | 33 | 9.22E+13 | 1.15078 | 33 | 176.444 | 1 | 0.11398 | 331.26905 | 8.54312 | 390.43905 | 23404 | 0.83144 |
| CCDC22 | 33 | 9.22E+13 | 1.15078 | 33 | 175.939 | 1 | 0.11398 | 331.26905 | 8.54312 | 390.43905 | 23404 | 0.83144 |
| PSMB2 | 33 | 2.19E+11 | 0.77068 | 33 | 154.129 | 1 | 0.15197 | 386.4 | 9.05473 | 5345.01485 | 279306 | 0.55682 |
| PSMB1 | 33 | 2.19E+11 | 0.77068 | 33 | 151.446 | 1 | 0.15197 | 386.4 | 9.05473 | 5345.01485 | 279306 | 0.55682 |
| PSMA2 | 33 | 2.19E+11 | 0.77068 | 33 | 150.234 | 1 | 0.15197 | 386.4 | 9.05473 | 5345.01485 | 279306 | 0.55682 |
| PSMB7 | 33 | 2.19E+11 | 0.77068 | 33 | 148.747 | 1 | 0.15197 | 386.4 | 9.05473 | 5345.01485 | 279306 | 0.55682 |
| TNF | 33 | 1.25E+10 | 0.40688 | 30 | 115.537 | 30 | 0.13026 | 368.43571 | 8.90648 | 17719.46119 | 380632 | 0.25189 |
| SLC27A2 | 32 | 9.22E+13 | 1.24323 | 24 | 68.434 | 19 | 0.11398 | 327.9119 | 8.47714 | 31638.90243 | 447994 | 0.58669 |
| RPL10L | 32 | 9.22E+13 | 0.96399 | 32 | 147.918 | 1 | 0.11398 | 324.40119 | 8.43772 | 482.15909 | 40804 | 0.70363 |
| STAG1 | 32 | 9.22E+13 | 0.8415 | 30 | 151.081 | 9 | 0.11398 | 361.14881 | 8.82421 | 11603.24142 | 312608 | 0.55242 |
| DCTN2 | 32 | 2.22E+13 | 0.61319 | 32 | 121.728 | 3 | 0.13026 | 365.9119 | 8.8962 | 6604.23272 | 145476 | 0.44758 |
| NOP14 | 32 | 2.09E+13 | 0.71717 | 31 | 141.959 | 7 | 0.11398 | 330.99881 | 8.48828 | 4778.6682 | 181876 | 0.49597 |
| PSME3 | 32 | 2.19E+11 | 0.80102 | 32 | 153.187 | 1 | 0.15197 | 382.98333 | 9.0376 | 4661.26347 | 257060 | 0.58468 |
| PSME1 | 32 | 2.19E+11 | 0.80102 | 32 | 147.418 | 5 | 0.15197 | 382.98333 | 9.0376 | 4661.26347 | 257060 | 0.58468 |
| PSMF1 | 32 | 2.19E+11 | 0.80102 | 32 | 143.48 | 1 | 0.15197 | 382.98333 | 9.0376 | 4661.26347 | 257060 | 0.58468 |
| TUBB | 31 | 2.35E+13 | 0.71425 | 31 | 111.95 | 1 | 0.13026 | 359.22619 | 8.84221 | 5543.44863 | 143930 | 0.52688 |
| DCTN3 | 31 | 2.22E+13 | 0.63554 | 31 | 122.457 | 3 | 0.13026 | 357.25952 | 8.82335 | 3891.47933 | 107150 | 0.46882 |
| TEX10 | 31 | 1.31E+12 | 0.6472 | 31 | 149.086 | 1 | 0.11398 | 329.20595 | 8.46257 | 6633.6493 | 149306 | 0.47742 |
| ACTR10 | 31 | 1.31E+12 | 0.54516 | 31 | 101.895 | 1 | 0.13026 | 352.80952 | 8.77622 | 7021.8043 | 180526 | 0.40215 |
| PSME4 | 31 | 2.19E+11 | 0.82212 | 31 | 152.466 | 8 | 0.15197 | 382.48333 | 9.03674 | 4458.71883 | 245682 | 0.60645 |
| CD36 | 30 | 9.22E+13 | 1.24323 | 24 | 72.701 | 9 | 0.11398 | 344.17976 | 8.68795 | 29268.96964 | 304636 | 0.64368 |
| MRPL1 | 30 | 9.22E+13 | 0.8076 | 30 | 107.833 | 6 | 0.11398 | 294.68214 | 8.11635 | 7821.00281 | 782286 | 0.6023 |
| MRPS11 | 30 | 9.22E+13 | 0.80452 | 30 | 107.94 | 4 | 0.11398 | 294.68214 | 8.11635 | 7834.06362 | 780472 | 0.6 |
| TPR | 30 | 4.18E+13 | 0.79673 | 29 | 159.535 | 40 | 0.13026 | 351.60238 | 8.76079 | 12318.00981 | 574386 | 0.56092 |
| CCT8 | 30 | 1.31E+12 | 0.46367 | 29 | 99.158 | 2 | 0.13026 | 384.4119 | 8.98875 | 25570.79787 | 468796 | 0.32644 |
| ATM | 30 | 4.03E+07 | 0.44082 | 29 | 65.753 | 3 | 0.11398 | 322.35833 | 8.40687 | 6070.0906 | 102682 | 0.31034 |
| RUVBL1 | 30 | 40832 | 0.25649 | 28 | 112.412 | 14 | 0.11398 | 376.15119 | 8.93476 | 26515.9401 | 509640 | 0.17241 |
| SPSB3 | 29 | 9.22E+13 | 1.32571 | 29 | 174.295 | 1 | 0.11398 | 320.56905 | 8.47114 | 0 | 0 | 1 |
| RANGAP1 | 29 | 9.22E+13 | 1.05082 | 27 | 152.675 | 3 | 0.11398 | 352.475 | 8.77536 | 4787.90555 | 122158 | 0.70197 |
| NUP54 | 29 | 4.18E+13 | 0.79673 | 29 | 156.291 | 1 | 0.11398 | 343.85833 | 8.66224 | 4941.19848 | 516054 | 0.60099 |
| NUP35 | 29 | 4.18E+13 | 0.79673 | 29 | 151.998 | 1 | 0.11398 | 343.85833 | 8.66224 | 4941.19848 | 516054 | 0.60099 |
| RRP9 | 29 | 2.09E+13 | 0.75102 | 29 | 144.071 | 2 | 0.11398 | 337.99048 | 8.5774 | 1689.69669 | 87492 | 0.5665 |
| MPHOSPH10 | 29 | 2.09E+13 | 0.76082 | 29 | 139.896 | 1 | 0.11398 | 332.32381 | 8.5217 | 1470.67331 | 83242 | 0.57389 |
| AP2M1 | 29 | 8.77E+10 | 0.53152 | 24 | 44.92 | 5 | 0.13026 | 341.00238 | 8.63054 | 13068.65064 | 137694 | 0.2931 |
| KAT2A | 29 | 445247 | 0.37433 | 28 | 101.558 | 7 | 0.11398 | 374.80357 | 8.92533 | 16390.39376 | 218744 | 0.26601 |
| CHUK | 29 | 11456 | 0.33633 | 29 | 102.424 | 1 | 0.11398 | 355.5369 | 8.7925 | 8001.80629 | 162178 | 0.25369 |
| STOM | 28 | 9.22E+13 | 1.04674 | 28 | 72.04 | 1 | 0.11398 | 327.49524 | 8.48571 | 715.77494 | 25090 | 0.79894 |
| CENPT | 28 | 9.22E+13 | 0.95316 | 28 | 150.455 | 2 | 0.11398 | 369.29881 | 8.90305 | 7213.47931 | 208858 | 0.72751 |
| EIF4G1 | 28 | 9.22E+13 | 0.92006 | 23 | 139.703 | 8 | 0.11398 | 348.54048 | 8.70681 | 16079.03928 | 385928 | 0.50794 |
| NOC4L | 28 | 2.09E+13 | 0.79025 | 28 | 143.51 | 1 | 0.11398 | 331.65714 | 8.51999 | 1168.71023 | 83800 | 0.60317 |
| AGPAT2 | 27 | 9.22E+13 | 1.16408 | 25 | 65.936 | 5 | 0.11398 | 328.14881 | 8.51656 | 9910.49928 | 144744 | 0.79202 |
| CD47 | 27 | 9.22E+13 | 1.12044 | 26 | 66.243 | 2 | 0.11398 | 331.975 | 8.53627 | 3627.44934 | 41434 | 0.81197 |
| ATP8A1 | 27 | 9.22E+13 | 1.084 | 27 | 66.222 | 1 | 0.11398 | 325.1619 | 8.47371 | 454.56229 | 18722 | 0.83761 |
| SLCO4C1 | 27 | 9.22E+13 | 1.084 | 27 | 65.95 | 1 | 0.11398 | 325.1619 | 8.47371 | 454.56229 | 18722 | 0.83761 |
| CYBA | 27 | 9.22E+13 | 1.0545 | 27 | 71.605 | 1 | 0.11398 | 351.29643 | 8.71623 | 7293.17207 | 81022 | 0.81481 |
| MRPS9 | 27 | 9.22E+13 | 0.88121 | 27 | 98.616 | 1 | 0.11398 | 293.01548 | 8.11293 | 6772.46049 | 635320 | 0.68091 |
| NOL6 | 27 | 2.09E+13 | 0.80378 | 27 | 142.456 | 1 | 0.11398 | 336.82381 | 8.57483 | 1178.21504 | 48364 | 0.62108 |
| TSR1 | 27 | 2.09E+13 | 0.78628 | 26 | 137.646 | 3 | 0.11398 | 328.99048 | 8.49942 | 3355.55734 | 129456 | 0.5698 |
| TOLLIP | 27 | 1.31E+12 | 0.68278 | 23 | 64.485 | 2 | 0.13026 | 346.44524 | 8.70766 | 9246.28622 | 140224 | 0.41595 |
| RAB5B | 27 | 8.72E+10 | 0.56043 | 27 | 46.814 | 6 | 0.11398 | 323.1369 | 8.46171 | 4270.44842 | 66210 | 0.43305 |
| RAB5A | 27 | 8.72E+10 | 0.56043 | 27 | 42.997 | 2 | 0.11398 | 323.1369 | 8.46171 | 4270.44842 | 66210 | 0.43305 |
| NPSR1 | 27 | 8.38E+07 | 0.66697 | 21 | 84.268 | 3 | 0.11398 | 345.45357 | 8.69481 | 27590.36917 | 879342 | 0.37892 |
| PTPN6 | 27 | 368118 | 0.30971 | 27 | 41.388 | 6 | 0.11398 | 349.54405 | 8.73766 | 13681.98158 | 143242 | 0.23932 |
| HSPA9 | 27 | 363588 | 0.56306 | 14 | 77.926 | 39 | 0.11398 | 302.52143 | 8.26632 | 69113.17588 | 4347944 | 0.24501 |
| PLAUR | 26 | 9.22E+13 | 1.24323 | 24 | 68.594 | 4 | 0.11398 | 323.77857 | 8.46343 | 6366 | 100632 | 0.85231 |
| ALDH3B1 | 26 | 9.22E+13 | 1.24323 | 24 | 64.71 | 7 | 0.11398 | 326.5619 | 8.50285 | 11247.9138 | 92220 | 0.84923 |
| CD33 | 26 | 9.22E+13 | 1.19349 | 25 | 69.744 | 5 | 0.11398 | 325.8619 | 8.47628 | 8666.28413 | 108816 | 0.87385 |
| DGAT1 | 26 | 9.22E+13 | 1.16408 | 25 | 71.243 | 9 | 0.11398 | 324.4119 | 8.46771 | 6437.37706 | 96126 | 0.85231 |
| PDS5A | 26 | 9.22E+13 | 1.01823 | 26 | 145.908 | 3 | 0.11398 | 347.49167 | 8.74023 | 1597.94489 | 88240 | 0.79692 |
| RRP36 | 26 | 2.09E+13 | 0.79807 | 26 | 134.801 | 1 | 0.11398 | 328.16548 | 8.48399 | 1744.20099 | 77716 | 0.62462 |
| EXOSC2 | 26 | 1.31E+12 | 0.68799 | 26 | 140.32 | 1 | 0.11398 | 303.85476 | 8.19691 | 598.4286 | 32240 | 0.53846 |
| EXOSC3 | 26 | 1.31E+12 | 0.68406 | 26 | 137.857 | 1 | 0.11398 | 307.87857 | 8.24918 | 1184.80461 | 41918 | 0.53538 |
| BARD1 | 26 | 4.03E+07 | 0.48356 | 26 | 77.178 | 1 | 0.11398 | 328.2131 | 8.46343 | 4378.444 | 135210 | 0.37846 |
| IRF3 | 26 | 2445 | 0.29417 | 25 | 50.524 | 13 | 0.11398 | 362.62024 | 8.89534 | 15130.68383 | 173102 | 0.21538 |
| ORMDL3 | 25 | 9.22E+13 | 1.24323 | 24 | 69.563 | 2 | 0.11398 | 323.1119 | 8.46171 | 2126 | 25164 | 0.92 |
| MMP25 | 25 | 9.22E+13 | 1.24323 | 24 | 64.881 | 2 | 0.11398 | 323.1119 | 8.46171 | 1544.95222 | 19130 | 0.92 |
| LAIR1 | 25 | 9.22E+13 | 1.19349 | 25 | 72.703 | 1 | 0.11398 | 324.94524 | 8.47285 | 186.28413 | 4856 | 0.94667 |
| ANO6 | 25 | 9.22E+13 | 1.19349 | 25 | 72.009 | 1 | 0.11398 | 324.94524 | 8.47285 | 186.28413 | 4856 | 0.94667 |
| CEACAM1 | 25 | 9.22E+13 | 1.19349 | 25 | 66.962 | 1 | 0.11398 | 324.94524 | 8.47285 | 186.28413 | 4856 | 0.94667 |
| PDS5B | 25 | 9.22E+13 | 1.08423 | 25 | 149.293 | 1 | 0.11398 | 346.99167 | 8.73937 | 1191.9238 | 80268 | 0.86 |
| MRPS6 | 25 | 9.22E+13 | 0.95816 | 25 | 87.982 | 9 | 0.11398 | 292.01548 | 8.11121 | 5191.99701 | 462728 | 0.76 |
| TUFM | 25 | 9.22E+13 | 0.8573 | 25 | 96.559 | 2 | 0.11398 | 292.01548 | 8.11121 | 5546.68384 | 533432 | 0.68 |
| EXOSC9 | 25 | 1.31E+12 | 0.72702 | 25 | 134.975 | 3 | 0.11398 | 303.1881 | 8.1952 | 512.73827 | 28450 | 0.57667 |
| BIRC3 | 25 | 1.25E+10 | 0.52531 | 25 | 105.64 | 3 | 0.13026 | 347.70238 | 8.74708 | 5270.58357 | 210324 | 0.41667 |
| RAB7A | 25 | 4.35E+07 | 0.93324 | 11 | 74.509 | 10 | 0.13026 | 334.0119 | 8.61939 | 19708.27732 | 514268 | 0.34333 |
| MS4A3 | 24 | 9.22E+13 | 1.24323 | 24 | 66.616 | 1 | 0.11398 | 322.6119 | 8.46086 | 0 | 0 | 1 |
| P2RX1 | 24 | 9.22E+13 | 1.24323 | 24 | 66.06 | 1 | 0.11398 | 322.6119 | 8.46086 | 0 | 0 | 1 |
| RPN2 | 24 | 9.22E+13 | 1.11656 | 18 | 139.869 | 5 | 0.13026 | 322.79286 | 8.51227 | 6682.37395 | 193444 | 0.58696 |
| RSL24D1 | 24 | 7.19E+09 | 0.66666 | 24 | 127.595 | 1 | 0.11398 | 296.01071 | 8.16692 | 704.46553 | 87454 | 0.53623 |
| RFC3 | 24 | 4.03E+07 | 0.49549 | 24 | 63.154 | 5 | 0.11398 | 338.21548 | 8.58083 | 7768.01976 | 170706 | 0.39855 |
| NOTCH1 | 24 | 42038 | 0.3018 | 24 | 64.108 | 10 | 0.11398 | 346.16429 | 8.68967 | 15070.808 | 194498 | 0.24275 |
| IRF7 | 24 | 3174 | 0.33333 | 24 | 56.521 | 7 | 0.11398 | 359.30357 | 8.87477 | 9603.78262 | 132062 | 0.26812 |
| KNTC1 | 23 | 9.22E+13 | 1.22513 | 23 | 145.84 | 1 | 0.11398 | 345.99167 | 8.73766 | 0 | 0 | 1 |
| MAD1L1 | 23 | 9.22E+13 | 1.22513 | 23 | 143.964 | 1 | 0.11398 | 345.99167 | 8.73766 | 0 | 0 | 1 |
| CDCA5 | 23 | 9.22E+13 | 1.22513 | 23 | 140.121 | 1 | 0.11398 | 345.99167 | 8.73766 | 0 | 0 | 1 |
| SKA2 | 23 | 9.22E+13 | 1.22513 | 23 | 135.971 | 1 | 0.11398 | 345.99167 | 8.73766 | 0 | 0 | 1 |
| TUBA1A | 23 | 2.22E+13 | 0.7886 | 22 | 105.534 | 2 | 0.11398 | 351.65119 | 8.79507 | 2787.96823 | 80326 | 0.59684 |
| NOL11 | 23 | 2.09E+13 | 0.9249 | 23 | 132.153 | 1 | 0.11398 | 326.49881 | 8.48057 | 354.9632 | 17100 | 0.75494 |
| RCL1 | 23 | 2.09E+13 | 0.9249 | 23 | 131.741 | 1 | 0.11398 | 326.49881 | 8.48057 | 354.9632 | 17100 | 0.75494 |
| ARG1 | 23 | 1.31E+12 | 0.68278 | 23 | 59.497 | 8 | 0.13026 | 340.69524 | 8.6691 | 5624.12466 | 100670 | 0.55731 |
| TRAPPC1 | 23 | 1.31E+12 | 0.6053 | 23 | 64.533 | 5 | 0.13026 | 336.49286 | 8.64168 | 6734.13073 | 96266 | 0.49407 |
| GNAI3 | 23 | 9.58E+08 | 0.64643 | 18 | 37.518 | 10 | 0.11398 | 325.9369 | 8.49771 | 9143.79829 | 131700 | 0.34783 |
| RFC5 | 23 | 4.03E+07 | 0.52298 | 23 | 66.514 | 6 | 0.11398 | 336.175 | 8.56369 | 4617.72704 | 128122 | 0.42688 |
| SUPT5H | 23 | 4.03E+07 | 0.51814 | 23 | 30.566 | 7 | 0.10131 | 298.18849 | 8.18748 | 2274.98496 | 32120 | 0.42292 |
| PIK3R3 | 23 | 3.99E+07 | 0.48908 | 23 | 52.184 | 1 | 0.11398 | 344.99405 | 8.68281 | 3864.48748 | 146980 | 0.39921 |
| RING1 | 23 | 422186 | 0.50845 | 23 | 84.204 | 3 | 0.11398 | 346.10119 | 8.62625 | 3846.75228 | 64496 | 0.41502 |
| ALDOA | 23 | 367943 | 0.52948 | 16 | 16.558 | 20 | 0.10131 | 307.19563 | 8.34688 | 15456.55355 | 166484 | 0.26087 |
| MRPS2 | 22 | 9.22E+13 | 1.09673 | 22 | 69.294 | 9 | 0.11398 | 267.0881 | 7.78299 | 693.98755 | 71922 | 0.90909 |
| TUBA4A | 22 | 2.22E+13 | 0.7886 | 22 | 98.293 | 1 | 0.11398 | 350.48452 | 8.79079 | 2203.09501 | 67394 | 0.65368 |
| SH3GL2 | 22 | 8.77E+10 | 0.63871 | 21 | 40.803 | 8 | 0.13026 | 329.31905 | 8.56026 | 4813.85489 | 70076 | 0.48918 |
| BIRC2 | 22 | 1.25E+10 | 0.62148 | 22 | 103.126 | 1 | 0.13026 | 341.63571 | 8.70166 | 3437.7205 | 142530 | 0.51515 |
| RAD51 | 22 | 4.03E+07 | 0.61411 | 20 | 60.175 | 6 | 0.11398 | 333.14643 | 8.56969 | 9690.8562 | 187050 | 0.4329 |
| RAB27A | 22 | 4.03E+07 | 0.93324 | 11 | 39.607 | 3 | 0.11398 | 323.50357 | 8.48914 | 8829.06872 | 82934 | 0.39394 |
| PHC1 | 22 | 422184 | 0.54314 | 22 | 90.187 | 3 | 0.11398 | 344.01786 | 8.61168 | 2636.87869 | 56100 | 0.45022 |
| EED | 22 | 419330 | 0.47003 | 22 | 68.106 | 1 | 0.11398 | 315.57619 | 8.38973 | 2030.37356 | 38826 | 0.38961 |
| FCER1G | 22 | 363211 | 0.42884 | 19 | 55.202 | 4 | 0.10131 | 324.45278 | 8.46171 | 6787.59698 | 106224 | 0.27706 |
| TRIM25 | 22 | 7330 | 0.39667 | 18 | 75.951 | 8 | 0.13026 | 362.74524 | 8.88163 | 25352.83878 | 409860 | 0.25974 |
| ERAL1 | 21 | 9.22E+13 | 1.15873 | 21 | 67.416 | 1 | 0.10131 | 234.11468 | 7.22596 | 0.64066 | 14 | 0.97619 |
| MRPL38 | 21 | 9.22E+13 | 1.15873 | 21 | 67.169 | 1 | 0.10131 | 234.11468 | 7.22596 | 0.64066 | 14 | 0.97619 |
| MRPL4 | 21 | 9.22E+13 | 1.15873 | 21 | 66.942 | 1 | 0.10131 | 234.11468 | 7.22596 | 0.64066 | 14 | 0.97619 |
| OXA1L | 21 | 9.22E+13 | 1.15873 | 21 | 66.433 | 1 | 0.10131 | 234.11468 | 7.22596 | 0.64066 | 14 | 0.97619 |
| MRPL53 | 21 | 9.22E+13 | 1.15873 | 21 | 66.32 | 1 | 0.10131 | 234.11468 | 7.22596 | 0.64066 | 14 | 0.97619 |
| MRPL49 | 21 | 9.22E+13 | 1.15873 | 21 | 65.048 | 1 | 0.10131 | 234.11468 | 7.22596 | 0.64066 | 14 | 0.97619 |
| MRPL30 | 21 | 9.22E+13 | 1.15873 | 21 | 63.635 | 1 | 0.10131 | 234.11468 | 7.22596 | 0.64066 | 14 | 0.97619 |
| MRPS18C | 21 | 9.22E+13 | 1.15873 | 21 | 63.631 | 1 | 0.10131 | 234.11468 | 7.22596 | 0.64066 | 14 | 0.97619 |
| MRPS34 | 21 | 9.22E+13 | 1.15873 | 21 | 63.458 | 1 | 0.10131 | 234.11468 | 7.22596 | 0.64066 | 14 | 0.97619 |
| DAP3 | 21 | 9.22E+13 | 1.15873 | 21 | 63.392 | 1 | 0.10131 | 234.11468 | 7.22596 | 0.64066 | 14 | 0.97619 |
| MRPL34 | 21 | 9.22E+13 | 1.15873 | 21 | 63.086 | 1 | 0.10131 | 234.11468 | 7.22596 | 0.64066 | 14 | 0.97619 |
| MRPL40 | 21 | 9.22E+13 | 1.15873 | 21 | 61.907 | 1 | 0.10131 | 234.11468 | 7.22596 | 0.64066 | 14 | 0.97619 |
| MRPL18 | 21 | 9.22E+13 | 1.15873 | 21 | 61.319 | 1 | 0.10131 | 234.11468 | 7.22596 | 0.64066 | 14 | 0.97619 |
| EIF4B | 21 | 9.22E+13 | 0.9722 | 21 | 124.877 | 2 | 0.11398 | 295.02262 | 8.19091 | 636.20122 | 18364 | 0.81905 |
| ANAPC16 | 21 | 8.77E+10 | 0.68393 | 21 | 117.935 | 2 | 0.13026 | 357.24762 | 8.83621 | 2874.14198 | 139814 | 0.57619 |
| NFKBIB | 21 | 8.72E+10 | 0.66697 | 21 | 107.342 | 1 | 0.13026 | 341.16429 | 8.69224 | 1499.70985 | 75280 | 0.5619 |
| NFKB2 | 21 | 8.72E+10 | 0.65567 | 21 | 114.062 | 1 | 0.13026 | 338.28095 | 8.66653 | 1486.09581 | 82388 | 0.55238 |
| CCL4 | 21 | 9.58E+08 | 0.62439 | 18 | 39.913 | 1 | 0.11398 | 329.4631 | 8.54912 | 6442.66649 | 102442 | 0.40476 |
| DVL3 | 21 | 4.79E+08 | 0.50357 | 20 | 92.987 | 9 | 0.13026 | 358.72619 | 8.86963 | 9799.67748 | 204362 | 0.39048 |
| NBN | 21 | 4.03E+07 | 0.59349 | 21 | 54.07 | 1 | 0.11398 | 308.87976 | 8.3186 | 1090.45097 | 32558 | 0.5 |
| KIF4A | 21 | 3993128 | 0.60976 | 19 | 94.457 | 2 | 0.13026 | 343.32381 | 8.72223 | 7194.18053 | 184030 | 0.4381 |
| PHC2 | 21 | 422064 | 0.56523 | 21 | 82.241 | 1 | 0.11398 | 342.85119 | 8.60654 | 2421.40686 | 50252 | 0.47619 |
| MOV10 | 21 | 42634 | 0.42884 | 19 | 74.791 | 6 | 0.11398 | 338.32619 | 8.60311 | 9954.15606 | 170920 | 0.30476 |
| PIK3CB | 21 | 41224 | 0.41827 | 21 | 43.745 | 1 | 0.11398 | 343.44643 | 8.68367 | 4410.50647 | 73264 | 0.35238 |
| TLN1 | 21 | 6612 | 0.36175 | 21 | 38.458 | 2 | 0.11398 | 342.37976 | 8.6751 | 4212.80002 | 50114 | 0.30476 |
| NR3C1 | 21 | 881 | 0.2571 | 18 | 82.606 | 10 | 0.13026 | 383.56905 | 9.08044 | 20641.4987 | 258002 | 0.16667 |
| SRSF10 | 20 | 9.22E+13 | 1.16682 | 20 | 147.14 | 1 | 0.11398 | 282.27024 | 8.00752 | 0 | 0 | 1 |
| ADCY3 | 20 | 4.79E+08 | 0.6264 | 20 | 37.931 | 1 | 0.11398 | 322.87262 | 8.5397 | 2997.19664 | 83112 | 0.53684 |
| NIP7 | 20 | 4.00E+07 | 0.69395 | 20 | 107.666 | 1 | 0.10131 | 297.56468 | 8.17034 | 257.93904 | 50208 | 0.59474 |
| KDM1A | 20 | 373047 | 0.44224 | 19 | 65.596 | 10 | 0.11398 | 333.02619 | 8.5834 | 7421.01646 | 87162 | 0.34737 |
| DKC1 | 20 | 94929 | 0.60715 | 17 | 95.128 | 6 | 0.11398 | 333.62619 | 8.60483 | 6665.84052 | 168392 | 0.39474 |
| VAV3 | 20 | 41032 | 0.4176 | 20 | 48.496 | 2 | 0.11398 | 341.3869 | 8.67424 | 1997.20816 | 32150 | 0.35789 |
| STX5 | 20 | 5428 | 0.33776 | 20 | 54.843 | 6 | 0.13026 | 341.87857 | 8.7128 | 15329.42087 | 210868 | 0.28947 |
| MAP3K7 | 20 | 355 | 0.42151 | 13 | 54.793 | 9 | 0.11398 | 341.925 | 8.72652 | 13787.69934 | 156386 | 0.18421 |
| SHC1 | 20 | 169 | 0.24793 | 19 | 31.366 | 5 | 0.11398 | 340.5869 | 8.66481 | 5936.81325 | 72352 | 0.19474 |
| GFM1 | 19 | 9.22E+13 | 1.14582 | 19 | 59.962 | 1 | 0.10131 | 233.11468 | 7.22425 | 0 | 0 | 1 |
| SMG6 | 19 | 9.22E+13 | 1.1239 | 18 | 126.322 | 1 | 0.11398 | 314.86667 | 8.40258 | 178.13249 | 15826 | 0.89474 |
| EIF3A | 19 | 9.22E+13 | 1.0319 | 19 | 125.104 | 2 | 0.11398 | 294.02262 | 8.1892 | 314.54326 | 9116 | 0.90058 |
| NDUFB8 | 19 | 4.83E+08 | 0.95798 | 13 | 10.192 | 14 | 0.10131 | 245.10437 | 7.4582 | 27328.12852 | 1260846 | 0.50292 |
| ATRIP | 19 | 3.99E+07 | 0.58296 | 19 | 40.673 | 1 | 0.10131 | 286.60635 | 8.05294 | 314.45226 | 13128 | 0.50877 |
| TAF5 | 19 | 3.99E+07 | 0.58032 | 18 | 45.48 | 6 | 0.11398 | 321.26786 | 8.442 | 7804.50985 | 153630 | 0.46199 |
| POLR1E | 19 | 450120 | 0.74324 | 14 | 89.66 | 1 | 0.11398 | 362.62619 | 8.84649 | 6902.40666 | 162468 | 0.44444 |
| PLCG2 | 19 | 40917 | 0.42605 | 18 | 41.364 | 7 | 0.11398 | 341.54643 | 8.67424 | 3046.24264 | 40960 | 0.33918 |
| FANCI | 19 | 15324 | 0.43554 | 19 | 42.437 | 7 | 0.10131 | 309.11111 | 8.31174 | 1721.59751 | 42626 | 0.38012 |
| PXN | 19 | 5906 | 0.36854 | 19 | 38.421 | 1 | 0.11398 | 336.49881 | 8.61682 | 2710.78431 | 38268 | 0.32164 |
| MTIF3 | 18 | 9.22E+13 | 1.1239 | 18 | 60.184 | 1 | 0.10131 | 232.44802 | 7.22254 | 0 | 0 | 1 |
| GFM2 | 18 | 9.22E+13 | 1.1239 | 18 | 55.162 | 1 | 0.10131 | 232.44802 | 7.22254 | 0 | 0 | 1 |
| EEF2 | 18 | 9.22E+13 | 1.08717 | 18 | 110.754 | 1 | 0.11398 | 289.96548 | 8.14292 | 3.36107 | 114 | 0.96732 |
| RPP25 | 18 | 2.09E+13 | 1.0769 | 16 | 108.769 | 3 | 0.11398 | 320.36548 | 8.44029 | 4248 | 55804 | 0.79085 |
| SH3KBP1 | 18 | 8.77E+10 | 0.77865 | 18 | 38.796 | 1 | 0.11398 | 329.92024 | 8.56712 | 2756.90075 | 24960 | 0.69281 |
| PLCB2 | 18 | 3.99E+07 | 0.56562 | 18 | 41.624 | 1 | 0.11398 | 327.32024 | 8.54312 | 1513.9589 | 63340 | 0.50327 |
| HDAC7 | 18 | 403209 | 0.54239 | 17 | 65.25 | 2 | 0.11398 | 327.70714 | 8.55255 | 3672.19268 | 52436 | 0.43791 |
| HDAC4 | 18 | 403204 | 0.48482 | 18 | 99.403 | 1 | 0.13026 | 329.5381 | 8.59797 | 5846.57245 | 185320 | 0.43137 |
| PDPK1 | 18 | 1161 | 0.38858 | 17 | 64.656 | 4 | 0.11398 | 364.95833 | 8.8962 | 7379.47169 | 138286 | 0.31373 |
| AKT2 | 18 | 876 | 0.29615 | 16 | 56.044 | 3 | 0.13026 | 356.14286 | 8.84992 | 13881.79063 | 248350 | 0.21569 |
| RUNX1 | 18 | 852 | 0.47886 | 10 | 52.522 | 11 | 0.11398 | 339.77024 | 8.69309 | 20220.80322 | 280342 | 0.1634 |
| NAPA | 18 | 263 | 0.29043 | 15 | 23.895 | 1 | 0.11398 | 296.9619 | 8.21919 | 5832.54438 | 107784 | 0.19608 |
| SRP9 | 17 | 9.22E+13 | 1.10097 | 17 | 117.042 | 1 | 0.11398 | 288.36548 | 8.12578 | 0 | 0 | 1 |
| SEC11A | 17 | 9.22E+13 | 1.10097 | 17 | 113.766 | 1 | 0.11398 | 288.36548 | 8.12578 | 0 | 0 | 1 |
| SSNA1 | 17 | 2.22E+13 | 1.08478 | 17 | 91.569 | 1 | 0.11398 | 331.25833 | 8.62968 | 1.33333 | 20 | 0.98529 |
| CEP76 | 17 | 2.22E+13 | 1.08478 | 17 | 89.438 | 1 | 0.11398 | 331.25833 | 8.62968 | 1.33333 | 20 | 0.98529 |
| CEP78 | 17 | 2.22E+13 | 1.08478 | 17 | 88.755 | 1 | 0.11398 | 331.25833 | 8.62968 | 1.33333 | 20 | 0.98529 |
| HAUS6 | 17 | 2.22E+13 | 1.08478 | 17 | 87.794 | 1 | 0.11398 | 331.25833 | 8.62968 | 1.33333 | 20 | 0.98529 |
| HAUS3 | 17 | 2.22E+13 | 1.08478 | 17 | 82.4 | 1 | 0.11398 | 331.25833 | 8.62968 | 1.33333 | 20 | 0.98529 |
| NPHP4 | 17 | 2.09E+13 | 1.0769 | 16 | 84.545 | 4 | 0.11398 | 331.425 | 8.63139 | 4580.85503 | 51986 | 0.88235 |
| DIS3 | 17 | 1.31E+12 | 0.8824 | 17 | 106.989 | 1 | 0.11398 | 285.80476 | 8.08036 | 667.83881 | 26562 | 0.80147 |
| NAPRT | 17 | 1.31E+12 | 1.05156 | 15 | 51.46 | 11 | 0.13026 | 323.28333 | 8.54398 | 11810.32358 | 98552 | 0.77941 |
| PYCARD | 17 | 1.31E+12 | 1.05156 | 15 | 51.424 | 2 | 0.13026 | 324.65238 | 8.55941 | 2670.20052 | 30582 | 0.77206 |
| ARSB | 17 | 1.31E+12 | 1.05156 | 15 | 51.004 | 4 | 0.13026 | 321.25238 | 8.51999 | 6366 | 77334 | 0.77941 |
| PLCB3 | 17 | 3.99E+07 | 0.59096 | 17 | 36.806 | 1 | 0.10131 | 299.09325 | 8.24661 | 745.88496 | 25242 | 0.53676 |
| NF1 | 17 | 3.99E+07 | 0.72807 | 13 | 97.611 | 3 | 0.13026 | 339.72857 | 8.72823 | 2469.03887 | 55046 | 0.46324 |
| KLC1 | 17 | 3991686 | 0.63144 | 17 | 71.644 | 4 | 0.13026 | 342.30952 | 8.70338 | 3287.9521 | 54046 | 0.57353 |
| KLC2 | 17 | 3991686 | 0.63144 | 17 | 70.875 | 3 | 0.13026 | 342.30952 | 8.70338 | 3287.9521 | 54046 | 0.57353 |
| TWISTNB | 17 | 450004 | 0.74324 | 14 | 79.684 | 5 | 0.11398 | 355.77619 | 8.79679 | 3561.51655 | 75304 | 0.5 |
| ACTN1 | 17 | 367944 | 0.85919 | 9 | 36.533 | 9 | 0.11398 | 345.74643 | 8.74366 | 14811.34752 | 142768 | 0.44118 |
| POLD1 | 17 | 364776 | 0.55858 | 17 | 51.052 | 1 | 0.10131 | 316.52778 | 8.37087 | 1343.36589 | 31274 | 0.50735 |
| JUP | 17 | 362943 | 0.54053 | 14 | 33.544 | 4 | 0.11398 | 340.67024 | 8.6631 | 9793.5061 | 85664 | 0.36029 |
| DDX58 | 17 | 7306 | 0.42096 | 17 | 57.404 | 1 | 0.11398 | 326.13571 | 8.55169 | 3507.83129 | 107636 | 0.38235 |
| CCT7 | 17 | 798 | 0.29143 | 17 | 91.904 | 1 | 0.11398 | 364.2369 | 8.87906 | 12177.83052 | 414042 | 0.26471 |
| RHOBTB2 | 17 | 336 | 0.36429 | 17 | 26.341 | 1 | 0.11398 | 309.87024 | 8.37773 | 64.92469 | 380 | 0.33088 |
| RHOV | 17 | 336 | 0.36429 | 17 | 25.527 | 1 | 0.11398 | 309.87024 | 8.37773 | 64.92469 | 380 | 0.33088 |
| THOC2 | 16 | 2.09E+13 | 1.0769 | 16 | 120.528 | 1 | 0.11398 | 305.0619 | 8.32631 | 0 | 0 | 1 |
| THOC6 | 16 | 2.09E+13 | 1.0769 | 16 | 115.257 | 1 | 0.11398 | 305.0619 | 8.32631 | 0 | 0 | 1 |
| POLDIP3 | 16 | 2.09E+13 | 1.0769 | 16 | 113.86 | 1 | 0.11398 | 305.0619 | 8.32631 | 0 | 0 | 1 |
| THOC1 | 16 | 2.09E+13 | 1.0769 | 16 | 113.749 | 1 | 0.11398 | 305.0619 | 8.32631 | 0 | 0 | 1 |
| SECISBP2 | 16 | 2.09E+13 | 1.0769 | 16 | 109.473 | 1 | 0.11398 | 285.01548 | 8.09064 | 0 | 0 | 1 |
| SCLT1 | 16 | 2.09E+13 | 1.0769 | 16 | 82.132 | 1 | 0.11398 | 330.59167 | 8.62796 | 0 | 0 | 1 |
| TUBGCP5 | 16 | 1.31E+12 | 1.05156 | 15 | 83.535 | 2 | 0.11398 | 330.45833 | 8.62625 | 2126 | 23610 | 0.875 |
| BIN1 | 16 | 8.77E+10 | 0.93332 | 16 | 34.624 | 1 | 0.11398 | 311.15357 | 8.40001 | 401.24423 | 4546 | 0.86667 |
| EPN1 | 16 | 8.77E+10 | 0.93332 | 16 | 30.955 | 2 | 0.11398 | 311.15357 | 8.40001 | 401.24423 | 4546 | 0.86667 |
| PACSIN2 | 16 | 8.77E+10 | 1.02152 | 15 | 30.399 | 2 | 0.11398 | 310.14643 | 8.38716 | 2129.83907 | 14168 | 0.85 |
| EPS15L1 | 16 | 8.77E+10 | 1.02152 | 15 | 29.252 | 2 | 0.11398 | 310.14643 | 8.38716 | 2129.83907 | 14168 | 0.85 |
| PTTG1 | 16 | 8.72E+10 | 0.8705 | 16 | 96.877 | 2 | 0.13026 | 331.10714 | 8.61854 | 398.33103 | 21328 | 0.80833 |
| SUFU | 16 | 6.23E+09 | 0.9963 | 13 | 96.833 | 4 | 0.13026 | 342.27857 | 8.71795 | 2362.71386 | 61186 | 0.65833 |
| GTF2E2 | 16 | 3.99E+07 | 0.66409 | 16 | 31.931 | 1 | 0.10131 | 295.48849 | 8.20291 | 1570.43305 | 42216 | 0.61667 |
| TAF11 | 16 | 3.99E+07 | 0.66409 | 16 | 30.444 | 1 | 0.10131 | 295.48849 | 8.20291 | 1570.43305 | 42216 | 0.61667 |
| CAPZB | 16 | 3639720 | 0.67307 | 16 | 76.207 | 2 | 0.13026 | 325.89286 | 8.59197 | 756.75129 | 21054 | 0.625 |
| TIMP1 | 16 | 367927 | 0.58086 | 15 | 14.291 | 1 | 0.10131 | 292.43968 | 8.19348 | 1999.14675 | 17576 | 0.48333 |
| MAML1 | 16 | 42010 | 0.48461 | 16 | 51.645 | 2 | 0.11398 | 334.23095 | 8.60397 | 3156.18498 | 69456 | 0.45 |
| LCP2 | 16 | 40623 | 0.56202 | 13 | 34.985 | 2 | 0.11398 | 336.98929 | 8.64939 | 4184.46434 | 45894 | 0.375 |
| PRKDC | 16 | 1639 | 0.63848 | 10 | 42.588 | 5 | 0.11398 | 323.0131 | 8.50713 | 9033.14112 | 112782 | 0.29167 |
| NOTCH2 | 16 | 1472 | 0.29615 | 16 | 46.959 | 1 | 0.11398 | 321.8119 | 8.48656 | 5547.0169 | 71798 | 0.275 |
| PPP1CA | 16 | 743 | 0.26039 | 15 | 54.535 | 2 | 0.11398 | 344.79881 | 8.73766 | 9562.46758 | 134456 | 0.21667 |
| CS | 16 | 330 | 0.3141 | 16 | 10.079 | 3 | 0.11398 | 247.52857 | 7.53104 | 5430.86145 | 330110 | 0.29167 |
| PRKACB | 16 | 45 | 0.25938 | 10 | 59.262 | 8 | 0.13026 | 367.22619 | 8.94419 | 15855.40558 | 244228 | 0.13333 |
| GALNS | 15 | 1.31E+12 | 1.05156 | 15 | 54.345 | 1 | 0.13026 | 320.08571 | 8.51742 | 0 | 0 | 1 |
| STK11IP | 15 | 1.31E+12 | 1.05156 | 15 | 52.543 | 1 | 0.13026 | 320.08571 | 8.51742 | 0 | 0 | 1 |
| GRN | 15 | 1.31E+12 | 1.05156 | 15 | 51.019 | 1 | 0.13026 | 320.08571 | 8.51742 | 0 | 0 | 1 |
| GM2A | 15 | 1.31E+12 | 1.05156 | 15 | 49.859 | 1 | 0.13026 | 320.08571 | 8.51742 | 0 | 0 | 1 |
| DPP7 | 15 | 1.31E+12 | 1.05156 | 15 | 46.448 | 1 | 0.13026 | 320.08571 | 8.51742 | 0 | 0 | 1 |
| HGS | 15 | 8.77E+10 | 1.02152 | 15 | 33.817 | 1 | 0.11398 | 309.64643 | 8.3863 | 3.83907 | 94 | 0.97143 |
| HIP1 | 15 | 8.77E+10 | 1.02152 | 15 | 31.098 | 1 | 0.11398 | 309.64643 | 8.3863 | 3.83907 | 94 | 0.97143 |
| LDLRAP1 | 15 | 8.77E+10 | 1.02152 | 15 | 28.405 | 1 | 0.11398 | 309.64643 | 8.3863 | 3.83907 | 94 | 0.97143 |
| PTGER1 | 15 | 8.35E+07 | 0.86128 | 15 | 37.456 | 1 | 0.10131 | 309.8004 | 8.38716 | 157.94857 | 5032 | 0.81905 |
| TAF1C | 15 | 450720 | 0.71106 | 15 | 80.062 | 1 | 0.11398 | 354.94286 | 8.79507 | 1188.55239 | 35692 | 0.67619 |
| TAF1B | 15 | 450720 | 0.71106 | 15 | 76.151 | 1 | 0.11398 | 354.94286 | 8.79507 | 1188.55239 | 35692 | 0.67619 |
| TAF1D | 15 | 450720 | 0.71106 | 15 | 69.647 | 1 | 0.11398 | 354.94286 | 8.79507 | 1188.55239 | 35692 | 0.67619 |
| NPM1 | 15 | 368041 | 0.58558 | 14 | 107.581 | 1 | 0.11398 | 344.06548 | 8.70938 | 8066.05041 | 466388 | 0.49524 |
| GAS6 | 15 | 367926 | 0.58086 | 15 | 15.877 | 1 | 0.10131 | 291.93968 | 8.19262 | 1414.27755 | 12472 | 0.55238 |
| EGR1 | 15 | 363001 | 0.85919 | 9 | 42.583 | 3 | 0.11398 | 309.17976 | 8.38716 | 4778.40793 | 58110 | 0.4381 |
| MAMLD1 | 15 | 42008 | 0.53079 | 15 | 56.227 | 4 | 0.11398 | 333.73095 | 8.60311 | 2624.01312 | 60498 | 0.50476 |
| IFIH1 | 15 | 7298 | 0.49073 | 15 | 52.344 | 2 | 0.11398 | 325.13571 | 8.54998 | 2885.03825 | 97882 | 0.46667 |
| AKT3 | 15 | 870 | 0.31046 | 15 | 46.474 | 9 | 0.13026 | 354.64286 | 8.84735 | 7962.39843 | 180966 | 0.29524 |
| NCK1 | 15 | 815 | 0.39414 | 14 | 45.835 | 4 | 0.11398 | 354.20357 | 8.8285 | 3043.96382 | 46760 | 0.33333 |
| PIP5K1C | 15 | 99 | 0.28153 | 14 | 33.277 | 5 | 0.11398 | 327.2369 | 8.55684 | 3197.97939 | 39478 | 0.2381 |
| GAPVD1 | 14 | 8.72E+10 | 1.02476 | 14 | 27.914 | 1 | 0.11398 | 309.14643 | 8.38544 | 0 | 0 | 1 |
| TPT1 | 14 | 6.23E+09 | 0.9963 | 13 | 99.888 | 1 | 0.11398 | 321.28214 | 8.51142 | 1547.24382 | 94392 | 0.85714 |
| CCL5 | 14 | 9.58E+08 | 0.87837 | 14 | 29.462 | 5 | 0.11398 | 303.775 | 8.32117 | 1036.86828 | 24704 | 0.85714 |
| GPR132 | 14 | 8.35E+07 | 0.93467 | 14 | 37.786 | 1 | 0.10131 | 305.79325 | 8.34259 | 80.94519 | 2710 | 0.91209 |
| NTSR1 | 14 | 8.35E+07 | 0.93467 | 14 | 36.589 | 1 | 0.10131 | 305.79325 | 8.34259 | 80.94519 | 2710 | 0.91209 |
| GNRH1 | 14 | 8.35E+07 | 0.93467 | 14 | 34.614 | 1 | 0.10131 | 305.79325 | 8.34259 | 80.94519 | 2710 | 0.91209 |
| QRFPR | 14 | 8.35E+07 | 0.93467 | 14 | 33.026 | 1 | 0.10131 | 305.79325 | 8.34259 | 80.94519 | 2710 | 0.91209 |
| GNRH2 | 14 | 8.35E+07 | 0.93467 | 14 | 31.694 | 1 | 0.10131 | 305.79325 | 8.34259 | 80.94519 | 2710 | 0.91209 |
| FFAR2 | 14 | 8.35E+07 | 0.93467 | 14 | 31.473 | 1 | 0.10131 | 305.79325 | 8.34259 | 80.94519 | 2710 | 0.91209 |
| RAD51B | 14 | 4.03E+07 | 0.83332 | 14 | 41.835 | 1 | 0.10131 | 282.19921 | 8.0178 | 78.11493 | 2576 | 0.81319 |
| BRIP1 | 14 | 4.03E+07 | 0.83332 | 14 | 37.014 | 1 | 0.10131 | 282.19921 | 8.0178 | 78.11493 | 2576 | 0.81319 |
| RAD17 | 14 | 3.99E+07 | 0.77702 | 14 | 34.111 | 1 | 0.10131 | 282.19921 | 8.0178 | 174.35244 | 5868 | 0.75824 |
| RAD1 | 14 | 3.99E+07 | 0.8558 | 13 | 41.514 | 1 | 0.10131 | 293.81111 | 8.17206 | 1238.32904 | 52406 | 0.73626 |
| SUPT16H | 14 | 372964 | 0.71711 | 12 | 25.539 | 2 | 0.10131 | 299.1123 | 8.25433 | 1434.54603 | 17042 | 0.54945 |
| TBL1XR1 | 14 | 40332 | 0.54298 | 11 | 50.033 | 5 | 0.11398 | 341.21071 | 8.7248 | 14237.72199 | 161374 | 0.37363 |
| DDX56 | 14 | 14760 | 0.67567 | 14 | 77.256 | 1 | 0.10131 | 299.6246 | 8.23804 | 428.52885 | 38858 | 0.65934 |
| CST3 | 14 | 10086 | 0.49549 | 14 | 21.242 | 1 | 0.10131 | 302.49325 | 8.31003 | 2764.18865 | 21720 | 0.48352 |
| PCGF2 | 14 | 7584 | 0.58558 | 14 | 76.894 | 1 | 0.11398 | 327.73452 | 8.472 | 737.39338 | 20864 | 0.57143 |
| MAVS | 14 | 7278 | 0.52927 | 14 | 54.241 | 3 | 0.11398 | 324.63571 | 8.54912 | 2050.43622 | 51922 | 0.51648 |
| ACTA1 | 14 | 5815 | 0.48538 | 13 | 33.819 | 4 | 0.11398 | 341.49643 | 8.70852 | 7565.9892 | 73072 | 0.41758 |
| WNT11 | 14 | 900 | 0.39414 | 14 | 28.684 | 6 | 0.11398 | 321.82024 | 8.49599 | 5959.81266 | 90756 | 0.38462 |
| FZD5 | 14 | 896 | 0.38288 | 14 | 38.05 | 1 | 0.11398 | 325.30357 | 8.56283 | 4171.51906 | 91426 | 0.37363 |
| CCT3 | 14 | 792 | 0.37162 | 14 | 63.792 | 3 | 0.11398 | 345.20357 | 8.74623 | 3047.33952 | 86826 | 0.36264 |
| ACO2 | 14 | 638 | 0.46171 | 14 | 12.128 | 1 | 0.10131 | 243.10437 | 7.45649 | 743.32027 | 54804 | 0.45055 |
| IDH3G | 14 | 320 | 0.42441 | 12 | 10.778 | 3 | 0.11398 | 245.8619 | 7.52419 | 3013.15641 | 165910 | 0.32967 |
| HIST2H2AB | 14 | 59 | 0.26824 | 13 | 50.871 | 4 | 0.11398 | 339.8369 | 8.70938 | 6009.12247 | 88286 | 0.23077 |
| CCR7 | 13 | 9.58E+08 | 0.98353 | 13 | 28.011 | 1 | 0.10131 | 282.61468 | 8.06494 | 0.16667 | 2 | 0.98718 |
| NPW | 13 | 9.58E+08 | 0.98353 | 13 | 27.005 | 1 | 0.10131 | 282.61468 | 8.06494 | 0.16667 | 2 | 0.98718 |
| CCL4L1 | 13 | 9.58E+08 | 0.98353 | 13 | 26.458 | 1 | 0.10131 | 282.61468 | 8.06494 | 0.16667 | 2 | 0.98718 |
| TAS2R41 | 13 | 9.58E+08 | 0.98353 | 13 | 24.674 | 1 | 0.10131 | 282.61468 | 8.06494 | 0.16667 | 2 | 0.98718 |
| CCL21 | 13 | 9.58E+08 | 0.98353 | 13 | 24.329 | 1 | 0.10131 | 282.61468 | 8.06494 | 0.16667 | 2 | 0.98718 |
| P2RY4 | 13 | 9.58E+08 | 0.98353 | 13 | 24.114 | 1 | 0.10131 | 282.61468 | 8.06494 | 0.16667 | 2 | 0.98718 |
| C5AR1 | 13 | 9.58E+08 | 0.98353 | 13 | 23.639 | 1 | 0.10131 | 282.61468 | 8.06494 | 0.16667 | 2 | 0.98718 |
| NDUFA5 | 13 | 4.83E+08 | 0.95798 | 13 | 4.097 | 1 | 0.09118 | 199.84365 | 6.55753 | 0.6 | 6 | 0.96154 |
| NDUFA10 | 13 | 4.83E+08 | 0.95798 | 13 | 4.049 | 1 | 0.09118 | 199.84365 | 6.55753 | 0.6 | 6 | 0.96154 |
| NDUFS4 | 13 | 4.83E+08 | 0.95798 | 13 | 3.932 | 1 | 0.09118 | 199.84365 | 6.55753 | 0.6 | 6 | 0.96154 |
| NDUFB11 | 13 | 4.83E+08 | 0.95798 | 13 | 3.794 | 1 | 0.09118 | 199.84365 | 6.55753 | 0.6 | 6 | 0.96154 |
| NDUFA11 | 13 | 4.83E+08 | 0.95798 | 13 | 3.741 | 1 | 0.09118 | 199.84365 | 6.55753 | 0.6 | 6 | 0.96154 |
| NDUFS8 | 13 | 4.83E+08 | 0.95798 | 13 | 3.68 | 1 | 0.09118 | 199.84365 | 6.55753 | 0.6 | 6 | 0.96154 |
| NDUFB5 | 13 | 4.83E+08 | 0.95798 | 13 | 3.515 | 1 | 0.09118 | 199.84365 | 6.55753 | 0.6 | 6 | 0.96154 |
| NDUFV3 | 13 | 4.83E+08 | 0.95798 | 13 | 3.267 | 1 | 0.09118 | 199.84365 | 6.55753 | 0.6 | 6 | 0.96154 |
| NDUFV2 | 13 | 4.83E+08 | 0.95798 | 13 | 3.077 | 1 | 0.09118 | 199.84365 | 6.55753 | 0.6 | 6 | 0.96154 |
| ERH | 13 | 3.99E+07 | 0.83025 | 13 | 112.78 | 1 | 0.11398 | 277.50595 | 7.96724 | 42.86673 | 860 | 0.83333 |
| SPRED2 | 13 | 3.99E+07 | 0.72807 | 13 | 86.624 | 2 | 0.13026 | 303.98095 | 8.36316 | 594.46862 | 25988 | 0.73077 |
| RAB3A | 13 | 3.99E+07 | 0.93324 | 11 | 24.4 | 1 | 0.11398 | 290.70714 | 8.13692 | 424.5407 | 2596 | 0.71795 |
| OSCAR | 13 | 367920 | 0.68975 | 13 | 24.311 | 1 | 0.11398 | 304.97262 | 8.34602 | 916.29564 | 15090 | 0.69231 |
| LRG1 | 13 | 367920 | 0.68975 | 13 | 24.054 | 1 | 0.11398 | 304.97262 | 8.34602 | 916.29564 | 15090 | 0.69231 |
| ACAA1 | 13 | 362904 | 0.85919 | 9 | 24.23 | 1 | 0.11398 | 300.21786 | 8.2946 | 6305.25192 | 102362 | 0.53846 |
| NMD3 | 13 | 11904 | 0.70252 | 13 | 78.115 | 3 | 0.11398 | 283.5869 | 8.08293 | 101.98034 | 10860 | 0.70513 |
| DDX54 | 13 | 7440 | 0.74084 | 13 | 69.885 | 1 | 0.10131 | 269.76746 | 7.89097 | 53.36861 | 2042 | 0.74359 |
| MFI2 | 13 | 5760 | 0.76834 | 7 | 11.071 | 2 | 0.10131 | 279.60278 | 8.01437 | 2919.9217 | 25658 | 0.46154 |
| TAF1 | 13 | 962 | 0.49207 | 11 | 45.414 | 8 | 0.10131 | 317.6123 | 8.40601 | 8260.88749 | 168036 | 0.37179 |
| NHP2 | 13 | 755 | 0.36587 | 12 | 86.613 | 2 | 0.11398 | 316.25595 | 8.44115 | 2881.23245 | 114858 | 0.32051 |
| SMARCA4 | 13 | 750 | 0.65858 | 7 | 41.756 | 5 | 0.11398 | 344.12619 | 8.77194 | 7313.0267 | 71782 | 0.24359 |
| FCGR3A | 13 | 420 | 0.42151 | 13 | 33.717 | 1 | 0.11398 | 330.08452 | 8.57826 | 2090.05745 | 29690 | 0.42308 |
| AP1S1 | 13 | 178 | 0.47733 | 9 | 15.126 | 6 | 0.11398 | 287.14286 | 8.10436 | 8050.79722 | 98822 | 0.28205 |
| MYD88 | 13 | 133 | 0.38051 | 12 | 41.246 | 2 | 0.11398 | 320.70119 | 8.53798 | 3171.69833 | 51682 | 0.33333 |
| ROCK2 | 13 | 55 | 0.31924 | 10 | 32.028 | 3 | 0.13026 | 346.16905 | 8.76508 | 5462.98889 | 77162 | 0.20513 |
| HCK | 13 | 43 | 0.34989 | 8 | 19.036 | 7 | 0.10131 | 300.77897 | 8.27318 | 7071.46733 | 113312 | 0.15385 |
| PRKCB | 13 | 42 | 0.40246 | 7 | 41.905 | 4 | 0.11398 | 340.50833 | 8.71966 | 9192.1198 | 127492 | 0.14103 |
| SNRNP48 | 12 | 4.79E+08 | 0.96591 | 12 | 111.062 | 1 | 0.11398 | 300.21071 | 8.28089 | 0 | 0 | 1 |
| SMU1 | 12 | 4.79E+08 | 0.96591 | 12 | 107.86 | 1 | 0.11398 | 300.49405 | 8.2886 | 0 | 0 | 1 |
| FCHO1 | 12 | 4.79E+08 | 0.96591 | 12 | 31.627 | 1 | 0.11398 | 305.34643 | 8.36487 | 0 | 0 | 1 |
| GPSM3 | 12 | 4.79E+08 | 0.96591 | 12 | 23.19 | 1 | 0.10131 | 282.11468 | 8.06408 | 0 | 0 | 1 |
| NDUFAF2 | 12 | 4.79E+08 | 0.96591 | 12 | 4.444 | 1 | 0.09118 | 199.34365 | 6.55667 | 0 | 0 | 1 |
| NDUFAF4 | 12 | 4.79E+08 | 0.96591 | 12 | 3.71 | 1 | 0.09118 | 199.34365 | 6.55667 | 0 | 0 | 1 |
| ECSIT | 12 | 4.79E+08 | 0.96591 | 12 | 3.03 | 1 | 0.09118 | 199.34365 | 6.55667 | 0 | 0 | 1 |
| RAB22A | 12 | 3.99E+07 | 0.83419 | 12 | 23.658 | 2 | 0.11398 | 284.29048 | 8.07351 | 238.28459 | 7608 | 0.86364 |
| RAB43 | 12 | 3.99E+07 | 0.93324 | 11 | 22.709 | 2 | 0.11398 | 285.00714 | 8.08036 | 759.82236 | 15910 | 0.83333 |
| POU2F2 | 12 | 3.99E+07 | 0.93324 | 11 | 22.547 | 8 | 0.11398 | 302.74405 | 8.34174 | 7925.58096 | 93338 | 0.83333 |
| RAB2B | 12 | 3.99E+07 | 0.93324 | 11 | 20.88 | 2 | 0.11398 | 284.29048 | 8.07351 | 2126 | 45512 | 0.83333 |
| RPAP2 | 12 | 3.99E+07 | 0.93324 | 11 | 15.577 | 2 | 0.10131 | 261.63492 | 7.78642 | 2126 | 37162 | 0.83333 |
| DDA1 | 12 | 7257624 | 0.83419 | 12 | 93.674 | 1 | 0.10131 | 293.51468 | 8.20205 | 34.42165 | 1516 | 0.86364 |
| DCAF6 | 12 | 7257624 | 0.83419 | 12 | 92.444 | 1 | 0.10131 | 293.51468 | 8.20205 | 34.42165 | 1516 | 0.86364 |
| DCAF10 | 12 | 7257624 | 0.83419 | 12 | 92.28 | 1 | 0.10131 | 293.51468 | 8.20205 | 34.42165 | 1516 | 0.86364 |
| ADRBK1 | 12 | 3628825 | 0.81447 | 11 | 25.169 | 2 | 0.10131 | 289.46944 | 8.17548 | 2178.16147 | 45698 | 0.72727 |
| IHH | 12 | 3628802 | 0.89787 | 10 | 78.99 | 3 | 0.13026 | 294.59524 | 8.29632 | 4778.30048 | 237688 | 0.68182 |
| SSRP1 | 12 | 372962 | 0.71711 | 12 | 24.729 | 1 | 0.10131 | 286.32183 | 8.08807 | 302.22273 | 4300 | 0.74242 |
| REST | 12 | 367950 | 0.68784 | 12 | 44.655 | 1 | 0.11398 | 305.54286 | 8.33745 | 177.10465 | 2860 | 0.71212 |
| RAD23A | 12 | 40444 | 0.65844 | 10 | 67.23 | 3 | 0.11398 | 337.00833 | 8.69052 | 4219.72791 | 44956 | 0.5 |
| HDAC6 | 12 | 40327 | 0.52601 | 11 | 63.372 | 8 | 0.13026 | 343.77143 | 8.76508 | 2963.87134 | 54392 | 0.4697 |
| RPF1 | 12 | 14640 | 0.74638 | 12 | 66.109 | 1 | 0.10131 | 257.72579 | 7.69387 | 3.37275 | 36 | 0.77273 |
| MAK16 | 12 | 3122 | 0.6293 | 12 | 65.075 | 2 | 0.10131 | 287.72937 | 8.13435 | 324.24157 | 12606 | 0.65152 |
| TAF15 | 12 | 1440 | 0.71324 | 6 | 74.257 | 2 | 0.11398 | 307.23571 | 8.32288 | 2387.35043 | 79014 | 0.45455 |
| FZD3 | 12 | 894 | 0.46832 | 12 | 31.732 | 3 | 0.11398 | 320.82024 | 8.49428 | 1431.96983 | 39594 | 0.48485 |
| MAP2K2 | 12 | 754 | 0.45891 | 10 | 25.179 | 2 | 0.11398 | 331.7131 | 8.61511 | 4028.95104 | 35252 | 0.34848 |
| HIST1H3J | 12 | 365 | 0.65858 | 7 | 21.882 | 5 | 0.10131 | 291.86111 | 8.19434 | 7185.99768 | 112432 | 0.27273 |
| SIN3B | 12 | 180 | 0.39905 | 10 | 41.397 | 7 | 0.11398 | 312.20952 | 8.40858 | 4715.72038 | 68262 | 0.30303 |
| IRAK1 | 12 | 124 | 0.35124 | 12 | 34.602 | 2 | 0.11398 | 323.02262 | 8.56283 | 1479.94882 | 18894 | 0.36364 |
| EFNB1 | 12 | 55 | 0.28846 | 11 | 26.13 | 1 | 0.11398 | 332.11071 | 8.60911 | 6130.8897 | 65850 | 0.25758 |
| RAB11B | 11 | 3.99E+07 | 0.93324 | 11 | 25.045 | 1 | 0.11398 | 283.79048 | 8.07265 | 0 | 0 | 1 |
| RABGGTB | 11 | 3.99E+07 | 0.93324 | 11 | 23.12 | 1 | 0.11398 | 283.79048 | 8.07265 | 0 | 0 | 1 |
| RAB39B | 11 | 3.99E+07 | 0.93324 | 11 | 22.918 | 1 | 0.11398 | 283.79048 | 8.07265 | 0 | 0 | 1 |
| NABP2 | 11 | 3.99E+07 | 0.93324 | 11 | 15.851 | 1 | 0.10131 | 261.13492 | 7.78556 | 0 | 0 | 1 |
| INTS9 | 11 | 3.99E+07 | 0.93324 | 11 | 15.449 | 1 | 0.10131 | 261.13492 | 7.78556 | 0 | 0 | 1 |
| SNAPC2 | 11 | 3.99E+07 | 0.93324 | 11 | 14.75 | 1 | 0.10131 | 261.13492 | 7.78556 | 0 | 0 | 1 |
| INTS3 | 11 | 3.99E+07 | 0.93324 | 11 | 14.645 | 1 | 0.10131 | 261.13492 | 7.78556 | 0 | 0 | 1 |
| INTS10 | 11 | 3.99E+07 | 0.93324 | 11 | 14.495 | 1 | 0.10131 | 261.13492 | 7.78556 | 0 | 0 | 1 |
| INTS2 | 11 | 3.99E+07 | 0.93324 | 11 | 13.453 | 1 | 0.10131 | 261.13492 | 7.78556 | 0 | 0 | 1 |
| DEK | 11 | 443520 | 0.8484 | 11 | 60.235 | 1 | 0.11398 | 345.64286 | 8.7428 | 220.84743 | 8800 | 0.90909 |
| NELFE | 11 | 372960 | 0.81447 | 11 | 22.834 | 1 | 0.10131 | 282.51706 | 8.04608 | 25.1894 | 378 | 0.87273 |
| NELFB | 11 | 372960 | 0.81447 | 11 | 22.102 | 1 | 0.10131 | 282.51706 | 8.04608 | 25.1894 | 378 | 0.87273 |
| CTDP1 | 11 | 372960 | 0.81447 | 11 | 20.447 | 1 | 0.10131 | 282.51706 | 8.04608 | 25.1894 | 378 | 0.87273 |
| LEO1 | 11 | 362884 | 0.64479 | 11 | 27.383 | 1 | 0.11398 | 300.05952 | 8.27575 | 566.53251 | 9498 | 0.69091 |
| PLEC | 11 | 362882 | 0.85919 | 9 | 76.12 | 2 | 0.11398 | 281.94881 | 8.07865 | 3088.22645 | 65878 | 0.65455 |
| BET1L | 11 | 5166 | 0.54298 | 11 | 37.054 | 1 | 0.13026 | 301.65238 | 8.3623 | 1719.8259 | 40186 | 0.58182 |
| MUS81 | 11 | 5070 | 0.49207 | 11 | 24.264 | 1 | 0.10131 | 266.99802 | 7.84641 | 77.85201 | 3334 | 0.52727 |
| ABI2 | 11 | 918 | 0.52601 | 11 | 32.36 | 1 | 0.11398 | 335.92024 | 8.68367 | 588.31662 | 11674 | 0.56364 |
| TAF10 | 11 | 870 | 0.45814 | 11 | 42.981 | 1 | 0.11398 | 310.59286 | 8.37859 | 915.55868 | 13388 | 0.49091 |
| HIST1H4A | 11 | 414 | 0.45814 | 11 | 25.886 | 1 | 0.10131 | 291.12778 | 8.1772 | 2712.7571 | 74972 | 0.49091 |
| AK6 | 11 | 264 | 0.4242 | 11 | 48.75 | 1 | 0.11398 | 313.48929 | 8.39144 | 1380.02202 | 25492 | 0.45455 |
| E2F6 | 11 | 243 | 0.41901 | 10 | 58.463 | 1 | 0.10131 | 318.84802 | 8.41372 | 1241.28401 | 27298 | 0.38182 |
| BCS1L | 11 | 68 | 0.30543 | 11 | 11.892 | 1 | 0.10131 | 240.9377 | 7.45049 | 208.10927 | 3682 | 0.32727 |
| STAT5A | 11 | 12 | 0.30898 | 3 | 32.363 | 3 | 0.13026 | 358.79524 | 8.89362 | 14406.44973 | 140408 | 0.05455 |
| TNKS2 | 10 | 3628800 | 0.89787 | 10 | 74.292 | 1 | 0.13026 | 288.2619 | 8.23804 | 0 | 0 | 1 |
| NDUFA4 | 10 | 3628800 | 0.89787 | 10 | 3.253 | 1 | 0.09118 | 198.34365 | 6.55496 | 0 | 0 | 1 |
| SNAI1 | 10 | 362886 | 0.7582 | 10 | 41.677 | 1 | 0.11398 | 294.15595 | 8.21662 | 178.19341 | 2490 | 0.84444 |
| RINT1 | 10 | 362882 | 0.73825 | 10 | 42.262 | 1 | 0.13026 | 293.4381 | 8.27661 | 501.9735 | 15972 | 0.82222 |
| NBAS | 10 | 362882 | 0.73825 | 10 | 36.445 | 1 | 0.13026 | 293.4381 | 8.27661 | 501.9735 | 15972 | 0.82222 |
| CTR9 | 10 | 362882 | 0.73825 | 10 | 20.622 | 1 | 0.11398 | 297.25952 | 8.25261 | 449.926 | 7716 | 0.82222 |
| HSPA1B | 10 | 362881 | 0.85919 | 9 | 77.574 | 6 | 0.11398 | 310.9869 | 8.47714 | 6187.78223 | 58896 | 0.8 |
| KIF1A | 10 | 362881 | 0.85919 | 9 | 50.496 | 1 | 0.11398 | 296.32619 | 8.31603 | 93.74181 | 6396 | 0.8 |
| AFF4 | 10 | 362881 | 0.85919 | 9 | 17.636 | 2 | 0.10131 | 276.95992 | 8.00495 | 2236.76678 | 34722 | 0.8 |
| KLRD1 | 10 | 40446 | 0.67839 | 10 | 27.199 | 1 | 0.11398 | 326.97262 | 8.58683 | 341.36712 | 4594 | 0.75556 |
| TTF1 | 10 | 6504 | 0.67839 | 10 | 47.414 | 1 | 0.11398 | 307.35952 | 8.35802 | 176.07101 | 3902 | 0.75556 |
| SDAD1 | 10 | 5760 | 0.7582 | 10 | 62.089 | 1 | 0.10131 | 256.72579 | 7.69215 | 1.41964 | 16 | 0.84444 |
| C17orf70 | 10 | 5184 | 0.61853 | 10 | 25.172 | 1 | 0.10131 | 266.15635 | 7.81556 | 45.78804 | 1384 | 0.68889 |
| CYLD | 10 | 5168 | 0.55867 | 10 | 44.505 | 1 | 0.11398 | 302.37143 | 8.32974 | 248.0116 | 5860 | 0.62222 |
| LAMB2 | 10 | 5046 | 0.76834 | 7 | 21.703 | 3 | 0.11398 | 320.2631 | 8.50113 | 4887.55152 | 36120 | 0.53333 |
| BAIAP2 | 10 | 912 | 0.57863 | 10 | 31.5 | 2 | 0.11398 | 335.42024 | 8.68281 | 415.66877 | 9266 | 0.64444 |
| GTF3A | 10 | 750 | 0.41901 | 10 | 34.007 | 2 | 0.11398 | 334.87619 | 8.70852 | 2528.88137 | 22290 | 0.46667 |
| HIST1H4F | 10 | 410 | 0.49882 | 10 | 19.807 | 1 | 0.10131 | 286.32063 | 8.14206 | 1683.64779 | 46530 | 0.55556 |
| MCM6 | 10 | 294 | 0.47886 | 10 | 20.792 | 1 | 0.10131 | 272.91587 | 7.95781 | 163.88058 | 1560 | 0.53333 |
| PKN1 | 10 | 22 | 0.2927 | 7 | 44.36 | 2 | 0.13026 | 365.4 | 8.9579 | 12779.26299 | 189574 | 0.24444 |
| MAP2K7 | 10 | 14 | 0.37893 | 4 | 39.943 | 3 | 0.13026 | 347.95952 | 8.80707 | 5584.81599 | 84300 | 0.13333 |
| MAP2K3 | 10 | 13 | 0.2842 | 4 | 21.301 | 3 | 0.11398 | 329.53452 | 8.62197 | 4732.35496 | 49484 | 0.11111 |
| NEK7 | 9 | 362880 | 0.85919 | 9 | 77.038 | 1 | 0.11398 | 279.32143 | 8.10693 | 0 | 0 | 1 |
| NEK6 | 9 | 362880 | 0.85919 | 9 | 75.021 | 1 | 0.11398 | 279.32143 | 8.10693 | 0 | 0 | 1 |
| SPOPL | 9 | 362880 | 0.85919 | 9 | 72.94 | 1 | 0.13026 | 287.7619 | 8.23719 | 0 | 0 | 1 |
| KIF26B | 9 | 362880 | 0.85919 | 9 | 38.354 | 1 | 0.11398 | 285.18571 | 8.18748 | 0 | 0 | 1 |
| KIFC2 | 9 | 362880 | 0.85919 | 9 | 36.207 | 1 | 0.11398 | 285.18571 | 8.18748 | 0 | 0 | 1 |
| GPBAR1 | 9 | 362880 | 0.85919 | 9 | 28.764 | 1 | 0.10131 | 296.1123 | 8.26204 | 0 | 0 | 1 |
| HRH2 | 9 | 362880 | 0.85919 | 9 | 25.732 | 1 | 0.10131 | 296.1123 | 8.26204 | 0 | 0 | 1 |
| HTR7 | 9 | 362880 | 0.85919 | 9 | 25.453 | 1 | 0.10131 | 296.1123 | 8.26204 | 0 | 0 | 1 |
| PTGER4 | 9 | 362880 | 0.85919 | 9 | 25.174 | 1 | 0.10131 | 296.1123 | 8.26204 | 0 | 0 | 1 |
| PTGIR | 9 | 362880 | 0.85919 | 9 | 23.203 | 1 | 0.10131 | 296.1123 | 8.26204 | 0 | 0 | 1 |
| NEU1 | 9 | 362880 | 0.85919 | 9 | 20.976 | 1 | 0.11398 | 296.86786 | 8.27832 | 0 | 0 | 1 |
| PROS1 | 9 | 362880 | 0.85919 | 9 | 7.647 | 1 | 0.10131 | 272.43492 | 8.01437 | 0 | 0 | 1 |
| TOR4A | 9 | 362880 | 0.85919 | 9 | 7.559 | 1 | 0.10131 | 272.43492 | 8.01437 | 0 | 0 | 1 |
| CFD | 9 | 362880 | 0.85919 | 9 | 7.474 | 1 | 0.10131 | 272.43492 | 8.01437 | 0 | 0 | 1 |
| NHLRC2 | 9 | 362880 | 0.85919 | 9 | 7.285 | 1 | 0.10131 | 272.43492 | 8.01437 | 0 | 0 | 1 |
| GTPBP2 | 9 | 362880 | 0.85919 | 9 | 6.93 | 1 | 0.10131 | 272.43492 | 8.01437 | 0 | 0 | 1 |
| MAGED2 | 9 | 362880 | 0.85919 | 9 | 6.788 | 1 | 0.10131 | 272.43492 | 8.01437 | 0 | 0 | 1 |
| TREM2 | 9 | 40322 | 0.69213 | 9 | 25.36 | 1 | 0.11398 | 326.47262 | 8.58597 | 68.56503 | 798 | 0.80556 |
| MAGT1 | 9 | 40321 | 0.8164 | 8 | 31.124 | 2 | 0.11398 | 296.07024 | 8.25604 | 3612.39979 | 100906 | 0.77778 |
| MGAT4A | 9 | 5042 | 0.76834 | 7 | 10.791 | 3 | 0.10131 | 274.13849 | 7.96467 | 4250 | 33946 | 0.58333 |
| BAP1 | 9 | 846 | 0.52506 | 9 | 38.006 | 2 | 0.11398 | 291.23571 | 8.20719 | 351.47014 | 7144 | 0.61111 |
| PEX13 | 9 | 756 | 0.52506 | 9 | 10.026 | 2 | 0.10131 | 259.70873 | 7.76243 | 2085.54448 | 55954 | 0.61111 |
| PEX10 | 9 | 756 | 0.52506 | 9 | 9.473 | 1 | 0.10131 | 259.70873 | 7.76243 | 2085.54448 | 55954 | 0.61111 |
| IKBKE | 9 | 728 | 0.62199 | 7 | 21.791 | 4 | 0.11398 | 284.65952 | 8.17891 | 2790.62098 | 43082 | 0.47222 |
| FCGR3B | 9 | 726 | 0.71324 | 6 | 14.977 | 7 | 0.10131 | 293.03135 | 8.20805 | 8031.93778 | 95038 | 0.5 |
| MAPKAPK3 | 9 | 723 | 0.71324 | 6 | 41.738 | 6 | 0.11398 | 329.94167 | 8.64682 | 2788.62355 | 49420 | 0.44444 |
| TIMM8A | 9 | 534 | 0.59666 | 9 | 11.641 | 2 | 0.10131 | 234.3496 | 7.37336 | 531.26878 | 99702 | 0.69444 |
| TIMM13 | 9 | 534 | 0.59666 | 9 | 8.084 | 1 | 0.10131 | 234.3496 | 7.37336 | 531.26878 | 99702 | 0.69444 |
| HIST1H4B | 9 | 408 | 0.57279 | 9 | 19.143 | 2 | 0.10131 | 283.50397 | 8.11721 | 845.83864 | 32104 | 0.66667 |
| HIST1H4H | 9 | 408 | 0.57279 | 9 | 17.739 | 1 | 0.10131 | 283.50397 | 8.11721 | 845.83864 | 32104 | 0.66667 |
| TOMM22 | 9 | 326 | 0.59666 | 9 | 7.801 | 1 | 0.10131 | 234.68294 | 7.37508 | 531.22116 | 99710 | 0.69444 |
| ARHGEF1 | 9 | 174 | 0.47733 | 9 | 27.59 | 1 | 0.11398 | 323.02024 | 8.53113 | 268.62562 | 12952 | 0.55556 |
| AP1B1 | 9 | 174 | 0.47733 | 9 | 14.467 | 1 | 0.11398 | 283.19286 | 8.07008 | 358.45786 | 4678 | 0.55556 |
| ASF1A | 9 | 127 | 0.64826 | 5 | 10.217 | 5 | 0.09118 | 253.21587 | 7.63302 | 8604.42122 | 236314 | 0.36111 |
| SQSTM1 | 9 | 80 | 0.51223 | 7 | 32.098 | 3 | 0.11398 | 303.39405 | 8.39573 | 1677.67999 | 19656 | 0.41667 |
| TOMM20 | 9 | 58 | 0.43905 | 7 | 9.921 | 1 | 0.10131 | 234.68294 | 7.37508 | 2654.83155 | 299098 | 0.36111 |
| LIMK1 | 9 | 50 | 0.358 | 9 | 19.336 | 1 | 0.11398 | 308.7369 | 8.40258 | 815.44602 | 8168 | 0.41667 |
| LRP5 | 9 | 38 | 0.33413 | 9 | 29.48 | 3 | 0.11398 | 315.425 | 8.51484 | 2718.09259 | 52492 | 0.38889 |
| STX1A | 9 | 13 | 0.37893 | 4 | 13.342 | 4 | 0.11398 | 302.94524 | 8.35116 | 4319.3829 | 33152 | 0.16667 |
| ADAM17 | 9 | 12 | 0.46346 | 3 | 31.829 | 5 | 0.11398 | 319.85714 | 8.55512 | 12874.66825 | 152902 | 0.11111 |
| IFNG | 9 | 12 | 0.25931 | 5 | 29.808 | 4 | 0.11398 | 350.87024 | 8.84306 | 8613.84479 | 95976 | 0.11111 |
| TFPT | 8 | 40320 | 0.8164 | 8 | 61.237 | 1 | 0.11398 | 319.46905 | 8.56026 | 0 | 0 | 1 |
| INO80D | 8 | 40320 | 0.8164 | 8 | 56.606 | 1 | 0.11398 | 319.46905 | 8.56026 | 0 | 0 | 1 |
| KDM6B | 8 | 40320 | 0.8164 | 8 | 43.932 | 1 | 0.11398 | 298.45952 | 8.27746 | 0 | 0 | 1 |
| DNAJC13 | 8 | 40320 | 0.8164 | 8 | 31.138 | 1 | 0.10131 | 278.38968 | 8.02294 | 0 | 0 | 1 |
| PIGR | 8 | 40320 | 0.8164 | 8 | 24.725 | 1 | 0.10131 | 278.38968 | 8.02294 | 0 | 0 | 1 |
| CAPN1 | 8 | 5760 | 0.75809 | 8 | 21.928 | 1 | 0.11398 | 318.74881 | 8.50713 | 23.42196 | 1158 | 0.92857 |
| SPTBN5 | 8 | 5046 | 0.67062 | 8 | 35.629 | 1 | 0.13026 | 300.15238 | 8.35973 | 283.5723 | 9094 | 0.82143 |
| CTSH | 8 | 5041 | 0.76834 | 7 | 12.52 | 2 | 0.10131 | 288.31468 | 8.19348 | 534.1044 | 3304 | 0.75 |
| RNF8 | 8 | 864 | 0.64146 | 8 | 32.136 | 1 | 0.11398 | 295.34762 | 8.24233 | 37.59812 | 680 | 0.78571 |
| LIG3 | 8 | 841 | 0.69516 | 7 | 37.181 | 3 | 0.10131 | 300.04921 | 8.24404 | 4278.86944 | 68914 | 0.67857 |
| PEX14 | 8 | 750 | 0.58315 | 8 | 7.838 | 2 | 0.10131 | 259.20873 | 7.76157 | 1024.87781 | 30340 | 0.71429 |
| WAS | 8 | 732 | 0.55399 | 8 | 30.82 | 1 | 0.11398 | 334.50357 | 8.6811 | 273.35868 | 3356 | 0.67857 |
| PPP4R2 | 8 | 722 | 0.71324 | 6 | 26.003 | 2 | 0.10131 | 298.04683 | 8.2946 | 1657.68569 | 14726 | 0.57143 |
| ARAF | 8 | 722 | 0.71324 | 6 | 21.146 | 1 | 0.13026 | 322.27857 | 8.60054 | 3609.55145 | 63888 | 0.53571 |
| TRAPPC4 | 8 | 246 | 0.49567 | 8 | 21.818 | 4 | 0.11398 | 298.86071 | 8.32631 | 1008.08683 | 20610 | 0.60714 |
| RARA | 8 | 123 | 0.64826 | 5 | 40.26 | 1 | 0.11398 | 323.24286 | 8.57398 | 1033.73976 | 16246 | 0.39286 |
| PLXND1 | 8 | 123 | 0.64826 | 5 | 27.295 | 4 | 0.10131 | 293.78849 | 8.21662 | 5119.33869 | 101158 | 0.35714 |
| IFI30 | 8 | 120 | 0.52483 | 8 | 17.22 | 1 | 0.11398 | 307.59881 | 8.45229 | 142.73805 | 2332 | 0.64286 |
| LDHD | 8 | 58 | 0.37904 | 8 | 12.012 | 2 | 0.11398 | 257.90119 | 7.75557 | 6987.21072 | 200444 | 0.46429 |
| SLC25A6 | 8 | 56 | 0.52304 | 6 | 9.628 | 3 | 0.10131 | 234.01627 | 7.37336 | 2120.86185 | 199398 | 0.42857 |
| PLXNA1 | 8 | 52 | 0.37904 | 8 | 21.577 | 1 | 0.11398 | 323.8869 | 8.57226 | 463.47082 | 6808 | 0.46429 |
| PLXNA2 | 8 | 51 | 0.43905 | 7 | 21.055 | 2 | 0.11398 | 324.22024 | 8.57483 | 1371.26559 | 17790 | 0.42857 |
| WNT10B | 8 | 50 | 0.43736 | 8 | 12.599 | 1 | 0.11398 | 263.97262 | 7.90554 | 394.4058 | 6064 | 0.53571 |
| HBEGF | 8 | 34 | 0.42794 | 6 | 22.083 | 1 | 0.11398 | 319.66786 | 8.54312 | 2319.8639 | 21588 | 0.32143 |
| GPAM | 8 | 13 | 0.21953 | 7 | 7.832 | 8 | 0.10131 | 283.62063 | 8.15577 | 11947.44699 | 169650 | 0.21429 |
| RNF31 | 7 | 5040 | 0.76834 | 7 | 41.293 | 1 | 0.11398 | 290.00714 | 8.20805 | 0 | 0 | 1 |
| SHARPIN | 7 | 5040 | 0.76834 | 7 | 38.732 | 1 | 0.11398 | 290.00714 | 8.20805 | 0 | 0 | 1 |
| GEN1 | 7 | 5040 | 0.76834 | 7 | 22.52 | 1 | 0.10131 | 264.99802 | 7.84298 | 0 | 0 | 1 |
| LTA4H | 7 | 5040 | 0.76834 | 7 | 12.857 | 1 | 0.10131 | 285.89802 | 8.17377 | 0 | 0 | 1 |
| FAM20A | 7 | 5040 | 0.76834 | 7 | 10.911 | 1 | 0.10131 | 273.13849 | 7.96296 | 0 | 0 | 1 |
| TYSND1 | 7 | 744 | 0.65858 | 7 | 9.224 | 1 | 0.10131 | 258.70873 | 7.76071 | 318.21115 | 4728 | 0.85714 |
| RRN3 | 7 | 721 | 0.71324 | 6 | 30.39 | 2 | 0.10131 | 294.5623 | 8.27147 | 1397.18092 | 12198 | 0.71429 |
| PPP3R1 | 7 | 721 | 0.71324 | 6 | 15.819 | 2 | 0.11398 | 283.4881 | 8.17377 | 1131.4254 | 13532 | 0.71429 |
| MPV17 | 7 | 721 | 0.71324 | 6 | 7.616 | 4 | 0.10131 | 247.56508 | 7.5876 | 6366 | 85152 | 0.71429 |
| SLC25A13 | 7 | 264 | 0.62199 | 7 | 8.109 | 1 | 0.10131 | 233.3496 | 7.37165 | 1.52852 | 22 | 0.80952 |
| SEC22A | 7 | 246 | 0.5854 | 7 | 23.692 | 1 | 0.11398 | 300.19405 | 8.33831 | 716.5049 | 20268 | 0.7619 |
| ORC2 | 7 | 246 | 0.5854 | 7 | 22.963 | 1 | 0.10131 | 295.60873 | 8.26632 | 593.80928 | 17648 | 0.7619 |
| MCM8 | 7 | 246 | 0.5854 | 7 | 20.201 | 2 | 0.10131 | 295.60873 | 8.26632 | 593.80928 | 17648 | 0.7619 |
| ORC4 | 7 | 246 | 0.5854 | 7 | 19.473 | 2 | 0.10131 | 295.60873 | 8.26632 | 593.80928 | 17648 | 0.7619 |
| CNIH2 | 7 | 246 | 0.5854 | 7 | 18.558 | 2 | 0.11398 | 300.19405 | 8.33831 | 716.5049 | 20268 | 0.7619 |
| FANCM | 7 | 174 | 0.62199 | 7 | 14.966 | 1 | 0.10131 | 273.15397 | 7.95781 | 47.04983 | 2700 | 0.80952 |
| ELMO2 | 7 | 156 | 0.5854 | 7 | 18.216 | 1 | 0.11398 | 305.50357 | 8.37516 | 14.38848 | 232 | 0.7619 |
| IFIT2 | 7 | 144 | 0.54881 | 7 | 14.688 | 1 | 0.10131 | 280.52183 | 8.13264 | 82.78312 | 1434 | 0.71429 |
| H2AFY | 7 | 122 | 0.64826 | 5 | 17.844 | 1 | 0.11398 | 287.04762 | 8.17206 | 496.49215 | 10204 | 0.52381 |
| MALT1 | 7 | 73 | 0.57059 | 6 | 34.858 | 1 | 0.11398 | 316.03095 | 8.51742 | 681.59757 | 6648 | 0.57143 |
| MSH2 | 7 | 73 | 0.57059 | 6 | 24.657 | 2 | 0.10131 | 288.53492 | 8.15063 | 2175.48159 | 30084 | 0.57143 |
| PRKCI | 7 | 55 | 0.52304 | 6 | 28.712 | 2 | 0.11398 | 309.34405 | 8.466 | 2177.12287 | 24498 | 0.52381 |
| WNT6 | 7 | 42 | 0.43905 | 7 | 7.99 | 1 | 0.10131 | 255.89921 | 7.77185 | 125.64679 | 1566 | 0.57143 |
| TGS1 | 7 | 28 | 0.56839 | 4 | 49.704 | 1 | 0.11398 | 306.44048 | 8.43172 | 9027.12835 | 137086 | 0.38095 |
| TNPO1 | 7 | 28 | 0.45378 | 5 | 40.649 | 2 | 0.10131 | 269.96151 | 7.85669 | 2777.80138 | 89150 | 0.33333 |
| ATG5 | 7 | 27 | 0.56839 | 4 | 18.83 | 1 | 0.11398 | 281.775 | 8.1652 | 1196.81464 | 13742 | 0.33333 |
| ITGA4 | 7 | 27 | 0.56839 | 4 | 13.68 | 4 | 0.11398 | 302.43095 | 8.37087 | 6372 | 49326 | 0.28571 |
| CFL1 | 7 | 22 | 0.32929 | 7 | 22.674 | 3 | 0.11398 | 329.60357 | 8.64853 | 1712.02143 | 16504 | 0.42857 |
| PC | 7 | 12 | 0.32413 | 5 | 2.665 | 9 | 0.10131 | 248.37698 | 7.64159 | 14377.8613 | 344722 | 0.2381 |
| AGPAT6 | 7 | 12 | 0.21953 | 7 | 3.827 | 2 | 0.10131 | 256.48135 | 7.78042 | 2196.78085 | 34784 | 0.28571 |
| TCF7L1 | 7 | 11 | 0.37893 | 4 | 39.799 | 2 | 0.11398 | 323.94286 | 8.5277 | 2598.69765 | 37870 | 0.19048 |
| APH1B | 7 | 10 | 0.46346 | 3 | 10.894 | 4 | 0.10131 | 284.83135 | 8.19091 | 5251.07613 | 51328 | 0.19048 |
| DLG4 | 7 | 8 | 0.30898 | 3 | 12.983 | 7 | 0.11398 | 308.8369 | 8.40087 | 7798.18099 | 99784 | 0.19048 |
| TYMS | 7 | 8 | 0.30898 | 3 | 9.103 | 15 | 0.11398 | 283.42619 | 8.1532 | 18916.03637 | 318788 | 0.14286 |
| CSNK2B | 7 | 7 | 0.30779 | 2 | 18.24 | 3 | 0.11398 | 303.125 | 8.38459 | 3818.52247 | 40064 | 0.09524 |
| DAXX | 7 | 7 | 0.30779 | 2 | 10.749 | 2 | 0.11398 | 278.35952 | 8.11378 | 3491.11301 | 47634 | 0.04762 |
| REEP4 | 7 | 7 | 0 | 1 | 1.506 | 1 | 0.00428 | 8 | 0.01807 | 14 | 42 | 0 |
| RTP1 | 7 | 7 | 0 | 1 | 1.499 | 8 | 0.00428 | 8 | 0.01807 | 14 | 42 | 0 |
| REEP6 | 7 | 7 | 0 | 1 | 1.49 | 1 | 0.00428 | 8 | 0.01807 | 14 | 42 | 0 |
| SSB | 6 | 720 | 0.71324 | 6 | 55.595 | 1 | 0.11398 | 267.54881 | 7.89868 | 0 | 0 | 1 |
| RAB3GAP1 | 6 | 720 | 0.71324 | 6 | 40.938 | 1 | 0.11398 | 297.83333 | 8.34688 | 0 | 0 | 1 |
| LIG1 | 6 | 720 | 0.71324 | 6 | 40.408 | 1 | 0.10131 | 297.79921 | 8.23547 | 0 | 0 | 1 |
| HES5 | 6 | 720 | 0.71324 | 6 | 27.213 | 1 | 0.10131 | 290.85516 | 8.19691 | 0 | 0 | 1 |
| CAPNS1 | 6 | 720 | 0.71324 | 6 | 18.449 | 1 | 0.11398 | 304.87024 | 8.37087 | 0 | 0 | 1 |
| SHOC2 | 6 | 720 | 0.71324 | 6 | 18.393 | 1 | 0.10131 | 277.44325 | 8.08208 | 0 | 0 | 1 |
| CTDNEP1 | 6 | 720 | 0.71324 | 6 | 17.191 | 1 | 0.10131 | 277.44325 | 8.08208 | 0 | 0 | 1 |
| CNEP1R1 | 6 | 720 | 0.71324 | 6 | 16.692 | 1 | 0.10131 | 277.44325 | 8.08208 | 0 | 0 | 1 |
| FAM131B | 6 | 720 | 0.71324 | 6 | 13.749 | 1 | 0.11398 | 280.675 | 8.10179 | 0 | 0 | 1 |
| CLCN6 | 6 | 720 | 0.71324 | 6 | 12.803 | 1 | 0.11398 | 280.675 | 8.10179 | 0 | 0 | 1 |
| KIAA1549 | 6 | 720 | 0.71324 | 6 | 12.413 | 1 | 0.11398 | 280.675 | 8.10179 | 0 | 0 | 1 |
| GSTK1 | 6 | 720 | 0.71324 | 6 | 8.254 | 1 | 0.10131 | 246.81508 | 7.58503 | 0 | 0 | 1 |
| RTN4RL1 | 6 | 720 | 0.71324 | 6 | 3.627 | 1 | 0.09118 | 234.88373 | 7.40678 | 0 | 0 | 1 |
| PRSS21 | 6 | 720 | 0.71324 | 6 | 3.574 | 1 | 0.09118 | 234.88373 | 7.40678 | 0 | 0 | 1 |
| LY6E | 6 | 720 | 0.71324 | 6 | 3.541 | 1 | 0.09118 | 234.88373 | 7.40678 | 0 | 0 | 1 |
| NRN1L | 6 | 720 | 0.71324 | 6 | 3.437 | 1 | 0.09118 | 234.88373 | 7.40678 | 0 | 0 | 1 |
| SPRN | 6 | 720 | 0.71324 | 6 | 2.278 | 1 | 0.09118 | 234.88373 | 7.40678 | 0 | 0 | 1 |
| C1orf86 | 6 | 144 | 0.61814 | 6 | 11.872 | 1 | 0.10131 | 262.16587 | 7.78985 | 11.38172 | 400 | 0.86667 |
| SETD1A | 6 | 121 | 0.64826 | 5 | 27.106 | 2 | 0.11398 | 294.33095 | 8.26975 | 2126 | 29942 | 0.66667 |
| PDE6G | 6 | 121 | 0.64826 | 5 | 19.268 | 1 | 0.10131 | 279.90992 | 8.0855 | 63.72937 | 884 | 0.66667 |
| TAZ | 6 | 54 | 0.52304 | 6 | 8.187 | 1 | 0.10131 | 233.01627 | 7.37165 | 1.52852 | 22 | 0.73333 |
| ARHGEF11 | 6 | 48 | 0.52304 | 6 | 16.119 | 1 | 0.11398 | 306.1869 | 8.3923 | 13.38607 | 152 | 0.73333 |
| ASAP1 | 6 | 32 | 0.42794 | 6 | 12.126 | 1 | 0.11398 | 304.07024 | 8.36487 | 3118.38602 | 73196 | 0.6 |
| MYO9B | 6 | 30 | 0.42794 | 6 | 18.5 | 1 | 0.11398 | 315.73452 | 8.48399 | 162.13482 | 1914 | 0.6 |
| FES | 6 | 28 | 0.38039 | 6 | 14.824 | 1 | 0.11398 | 313.3869 | 8.47114 | 165.52747 | 2662 | 0.53333 |
| SEH1L | 6 | 26 | 0.56839 | 4 | 46.069 | 3 | 0.10131 | 275.00992 | 8.03923 | 3702.46404 | 173088 | 0.46667 |
| EPHB4 | 6 | 20 | 0.38039 | 6 | 16.374 | 3 | 0.11398 | 323.9369 | 8.56541 | 1825.48321 | 19160 | 0.53333 |
| CDC37 | 6 | 12 | 0.46346 | 3 | 25.388 | 1 | 0.11398 | 315.11786 | 8.5217 | 582.85419 | 13048 | 0.4 |
| EIF4EBP1 | 6 | 12 | 0.28529 | 6 | 25.009 | 5 | 0.11398 | 311.95714 | 8.47628 | 6055.0327 | 94544 | 0.4 |
| MLST8 | 6 | 11 | 0.32413 | 5 | 12.905 | 4 | 0.11398 | 279.00119 | 8.14549 | 3240.59349 | 44424 | 0.33333 |
| PIP4K2A | 6 | 11 | 0.32413 | 5 | 12.642 | 2 | 0.11398 | 285.72024 | 8.20119 | 569.14507 | 9358 | 0.33333 |
| IL4R | 6 | 11 | 0.32413 | 5 | 12.582 | 3 | 0.11398 | 310.64643 | 8.48314 | 1635.64303 | 14760 | 0.33333 |
| GMPS | 6 | 11 | 0.32413 | 5 | 1.721 | 5 | 0.10131 | 215.27619 | 7.08199 | 6963.96137 | 95712 | 0.33333 |
| JUND | 6 | 10 | 0.37893 | 4 | 23.955 | 3 | 0.11398 | 296.68929 | 8.29546 | 4316.65495 | 51374 | 0.26667 |
| SPHK1 | 6 | 9 | 0.46346 | 3 | 22.646 | 2 | 0.11398 | 304.13452 | 8.41201 | 2665.72453 | 54322 | 0.2 |
| LDHA | 6 | 9 | 0.46346 | 3 | 14.312 | 16 | 0.10131 | 289.39325 | 8.21062 | 16514.84762 | 206266 | 0.26667 |
| DUT | 6 | 9 | 0.46346 | 3 | 11.142 | 3 | 0.10131 | 274.57778 | 7.99209 | 8766.26428 | 106696 | 0.26667 |
| RRAGB | 6 | 9 | 0.46346 | 3 | 4.128 | 2 | 0.10131 | 244.14087 | 7.6296 | 2880.74662 | 48996 | 0.26667 |
| MAP3K11 | 6 | 7 | 0.30898 | 3 | 10.068 | 1 | 0.11398 | 312.71786 | 8.48571 | 561.20883 | 6904 | 0.13333 |
| SMPD1 | 6 | 6 | 0.30779 | 2 | 19.983 | 3 | 0.11398 | 302.31786 | 8.33488 | 2767.47092 | 70272 | 0.13333 |
| RBL1 | 6 | 6 | 0.30779 | 2 | 15.347 | 4 | 0.10131 | 284.61111 | 8.16434 | 6556.83504 | 110762 | 0.06667 |
| MYO6 | 6 | 6 | 0.30779 | 2 | 7.017 | 3 | 0.11398 | 267.57143 | 7.90725 | 3118.76324 | 35678 | 0.06667 |
| NT5C | 6 | 6 | 0.30779 | 2 | 3.671 | 10 | 0.11398 | 267.31667 | 7.97581 | 13079.52951 | 144762 | 0.2 |
| KDM4A | 5 | 120 | 0.64826 | 5 | 24.328 | 1 | 0.11398 | 286.19762 | 8.15835 | 0 | 0 | 1 |
| IFI35 | 5 | 120 | 0.64826 | 5 | 11.883 | 1 | 0.10131 | 273.98849 | 8.07265 | 0 | 0 | 1 |
| IFITM2 | 5 | 120 | 0.64826 | 5 | 10.414 | 1 | 0.10131 | 273.98849 | 8.07265 | 0 | 0 | 1 |
| BLOC1S6 | 5 | 120 | 0.64826 | 5 | 9.599 | 1 | 0.10131 | 271.79921 | 7.94924 | 0 | 0 | 1 |
| SEC16A | 5 | 120 | 0.64826 | 5 | 9.463 | 1 | 0.11398 | 265.93333 | 7.95353 | 0 | 0 | 1 |
| BLOC1S3 | 5 | 120 | 0.64826 | 5 | 9.37 | 1 | 0.10131 | 271.79921 | 7.94924 | 0 | 0 | 1 |
| MAN1A1 | 5 | 120 | 0.64826 | 5 | 8.372 | 1 | 0.11398 | 256.90119 | 7.81984 | 0 | 0 | 1 |
| RPA4 | 5 | 120 | 0.64826 | 5 | 8.358 | 1 | 0.10131 | 266.75635 | 7.90383 | 0 | 0 | 1 |
| MAN2A2 | 5 | 120 | 0.64826 | 5 | 8.086 | 1 | 0.11398 | 256.90119 | 7.81984 | 0 | 0 | 1 |
| MAN1A2 | 5 | 120 | 0.64826 | 5 | 7.758 | 1 | 0.11398 | 256.90119 | 7.81984 | 0 | 0 | 1 |
| MYL6 | 5 | 30 | 0.51861 | 5 | 16.292 | 1 | 0.11398 | 306.3869 | 8.39487 | 6.85083 | 88 | 0.8 |
| EXOC1 | 5 | 30 | 0.51861 | 5 | 9.275 | 4 | 0.11398 | 298.92024 | 8.32374 | 1634.74279 | 35952 | 0.8 |
| EXOC8 | 5 | 30 | 0.51861 | 5 | 7.826 | 1 | 0.11398 | 298.92024 | 8.32374 | 1634.74279 | 35952 | 0.8 |
| REC8 | 5 | 26 | 0.45378 | 5 | 31.649 | 1 | 0.11398 | 294.50595 | 8.27918 | 25.19185 | 356 | 0.7 |
| ARAP3 | 5 | 26 | 0.45378 | 5 | 20.31 | 1 | 0.11398 | 314.02976 | 8.46771 | 136.2599 | 1680 | 0.7 |
| NCAPH2 | 5 | 25 | 0.56839 | 4 | 36.141 | 5 | 0.11398 | 317.03929 | 8.50285 | 2598.75709 | 27524 | 0.6 |
| SYNE2 | 5 | 25 | 0.56839 | 4 | 25.044 | 2 | 0.11398 | 295.47262 | 8.2886 | 1335.89366 | 15236 | 0.6 |
| DAK | 5 | 25 | 0.56839 | 4 | 18.445 | 1 | 0.11398 | 277.57976 | 8.11378 | 1528.27241 | 27322 | 0.6 |
| PLXNB1 | 5 | 25 | 0.56839 | 4 | 15.931 | 1 | 0.11398 | 306.65357 | 8.40258 | 833.37517 | 8684 | 0.6 |
| MYO9A | 5 | 25 | 0.56839 | 4 | 15.924 | 1 | 0.11398 | 304.52024 | 8.37344 | 810.26164 | 13120 | 0.6 |
| CD74 | 5 | 25 | 0.56839 | 4 | 9.191 | 1 | 0.11398 | 265.35238 | 7.87983 | 228.98503 | 1202 | 0.6 |
| HIST1H2AG | 5 | 25 | 0.56839 | 4 | 7.734 | 1 | 0.10131 | 257.87183 | 7.83527 | 73.09642 | 2844 | 0.6 |
| PKD2 | 5 | 25 | 0.56839 | 4 | 2.484 | 2 | 0.10131 | 234.72302 | 7.4582 | 2126 | 48292 | 0.6 |
| DLL1 | 5 | 18 | 0.45378 | 5 | 24.01 | 1 | 0.11398 | 286.0381 | 8.17891 | 282.4623 | 2512 | 0.7 |
| IL1RAP | 5 | 14 | 0.38896 | 5 | 25.342 | 1 | 0.11398 | 324.71786 | 8.60483 | 296.02379 | 4604 | 0.6 |
| EPHB6 | 5 | 14 | 0.38896 | 5 | 11.648 | 1 | 0.11398 | 311.9369 | 8.44372 | 1135.86599 | 10482 | 0.6 |
| CHCHD10 | 5 | 14 | 0.38896 | 5 | 8.757 | 1 | 0.10131 | 232.18294 | 7.36908 | 1.52852 | 22 | 0.6 |
| BCL6 | 5 | 13 | 0.47366 | 4 | 11.161 | 1 | 0.10131 | 292.82421 | 8.24576 | 247.4053 | 3790 | 0.5 |
| CRY1 | 5 | 12 | 0.38896 | 5 | 42.593 | 1 | 0.11398 | 315.74524 | 8.47028 | 302.20815 | 6892 | 0.6 |
| ROR2 | 5 | 10 | 0.32413 | 5 | 19.745 | 1 | 0.11398 | 315.1369 | 8.47885 | 361.12132 | 4876 | 0.5 |
| ARIH1 | 5 | 10 | 0.32413 | 5 | 18.619 | 1 | 0.11398 | 295.05 | 8.30831 | 353.74497 | 6684 | 0.5 |
| TKT | 5 | 10 | 0.32413 | 5 | 2.583 | 1 | 0.09118 | 239.74325 | 7.52847 | 63.14411 | 778 | 0.5 |
| MDH2 | 5 | 10 | 0.32413 | 5 | 2.319 | 1 | 0.10131 | 213.63929 | 6.99887 | 72.32868 | 1780 | 0.5 |
| GMPR2 | 5 | 10 | 0.32413 | 5 | 1.319 | 2 | 0.09118 | 179.44246 | 6.17703 | 1431.37634 | 36092 | 0.5 |
| BRPF1 | 5 | 9 | 0.37893 | 4 | 17.684 | 1 | 0.11398 | 291.89643 | 8.26461 | 1925.13274 | 29352 | 0.4 |
| TAX1BP1 | 5 | 8 | 0.46346 | 3 | 22.065 | 2 | 0.11398 | 276.6 | 8.10607 | 2401.29712 | 56872 | 0.3 |
| RGS9 | 5 | 8 | 0.46346 | 3 | 18.113 | 1 | 0.11398 | 293.0631 | 8.25775 | 342.67501 | 9786 | 0.3 |
| MUC1 | 5 | 6 | 0.30898 | 3 | 1.327 | 3 | 0.00342 | 6 | 0.0225 | 22.5 | 32 | 0.2 |
| PIK3C3 | 5 | 5 | 0.30779 | 2 | 15.798 | 1 | 0.13026 | 293.07143 | 8.28261 | 1536.90248 | 20998 | 0.1 |
| LPPR2 | 5 | 5 | 0.30779 | 2 | 8.484 | 6 | 0.10131 | 246.84444 | 7.61674 | 2535.26253 | 49634 | 0.1 |
| GLUD2 | 5 | 5 | 0.30779 | 2 | 3.597 | 3 | 0.10131 | 221.02738 | 7.15655 | 2345.63801 | 19872 | 0.2 |
| PTPN13 | 5 | 5 | 0.30779 | 2 | 3.191 | 3 | 0.10131 | 259.85873 | 7.83013 | 4638.13014 | 48520 | 0.1 |
| SREBF2 | 5 | 5 | 0.30779 | 2 | 1.394 | 5 | 0.09118 | 198.91706 | 6.67065 | 8490 | 100970 | 0.1 |
| MUT | 5 | 5 | 0.30779 | 2 | 1.326 | 5 | 0.09118 | 201.025 | 6.73749 | 8490 | 245578 | 0.1 |
| PIN1 | 5 | 5 | 0 | 1 | 22.805 | 3 | 0.11398 | 322.02262 | 8.5894 | 2662.63871 | 24718 | 0 |
| NIPBL | 4 | 24 | 0.56839 | 4 | 29.31 | 1 | 0.10131 | 263.72778 | 7.91582 | 0 | 0 | 1 |
| MTF2 | 4 | 24 | 0.56839 | 4 | 26.439 | 1 | 0.11398 | 289.15952 | 8.19948 | 0 | 0 | 1 |
| MAU2 | 4 | 24 | 0.56839 | 4 | 24.631 | 1 | 0.10131 | 263.72778 | 7.91582 | 0 | 0 | 1 |
| TRIM28 | 4 | 24 | 0.56839 | 4 | 16.117 | 1 | 0.10131 | 281.98611 | 8.0975 | 0 | 0 | 1 |
| REV1 | 4 | 24 | 0.56839 | 4 | 16.063 | 1 | 0.11398 | 286.45119 | 8.1952 | 0 | 0 | 1 |
| ARHGAP30 | 4 | 24 | 0.56839 | 4 | 15.988 | 1 | 0.11398 | 302.4869 | 8.35973 | 0 | 0 | 1 |
| TADA1 | 4 | 24 | 0.56839 | 4 | 15.529 | 1 | 0.11398 | 280.72738 | 8.12321 | 0 | 0 | 1 |
| TRIM29 | 4 | 24 | 0.56839 | 4 | 15.159 | 1 | 0.10131 | 293.70278 | 8.31174 | 0 | 0 | 1 |
| FGD2 | 4 | 24 | 0.56839 | 4 | 14.962 | 1 | 0.11398 | 302.4869 | 8.35973 | 0 | 0 | 1 |
| ARHGAP4 | 4 | 24 | 0.56839 | 4 | 14.711 | 1 | 0.11398 | 302.4869 | 8.35973 | 0 | 0 | 1 |
| OBSCN | 4 | 24 | 0.56839 | 4 | 13.879 | 1 | 0.11398 | 302.4869 | 8.35973 | 0 | 0 | 1 |
| ARHGAP17 | 4 | 24 | 0.56839 | 4 | 13.476 | 1 | 0.11398 | 302.4869 | 8.35973 | 0 | 0 | 1 |
| ARHGAP22 | 4 | 24 | 0.56839 | 4 | 13.458 | 1 | 0.11398 | 302.4869 | 8.35973 | 0 | 0 | 1 |
| TRIM3 | 4 | 24 | 0.56839 | 4 | 12.519 | 1 | 0.10131 | 293.70278 | 8.31174 | 0 | 0 | 1 |
| ARHGAP33 | 4 | 24 | 0.56839 | 4 | 11.801 | 1 | 0.11398 | 302.4869 | 8.35973 | 0 | 0 | 1 |
| TRIM62 | 4 | 24 | 0.56839 | 4 | 11.522 | 1 | 0.10131 | 293.70278 | 8.31174 | 0 | 0 | 1 |
| TRIM46 | 4 | 24 | 0.56839 | 4 | 10.152 | 1 | 0.10131 | 293.70278 | 8.31174 | 0 | 0 | 1 |
| ARHGAP1 | 4 | 24 | 0.56839 | 4 | 9.215 | 1 | 0.11398 | 302.4869 | 8.35973 | 0 | 0 | 1 |
| PKD1 | 4 | 24 | 0.56839 | 4 | 2.733 | 1 | 0.10131 | 234.22302 | 7.45734 | 0 | 0 | 1 |
| SPAG5 | 4 | 12 | 0.47366 | 4 | 31.317 | 1 | 0.11398 | 296.5631 | 8.33317 | 10.22511 | 206 | 0.83333 |
| DMAP1 | 4 | 12 | 0.47366 | 4 | 20.091 | 1 | 0.11398 | 308.56905 | 8.47371 | 6.98324 | 64 | 0.83333 |
| TIRAP | 4 | 12 | 0.47366 | 4 | 15.469 | 1 | 0.11398 | 283.84643 | 8.15749 | 48.43265 | 940 | 0.83333 |
| RABGEF1 | 4 | 12 | 0.47366 | 4 | 8.501 | 1 | 0.10131 | 242.2504 | 7.55333 | 0.66667 | 2 | 0.83333 |
| G6PD | 4 | 12 | 0.47366 | 4 | 3.273 | 1 | 0.09118 | 248.49087 | 7.68358 | 115.83725 | 2016 | 0.83333 |
| PEX19 | 4 | 12 | 0.47366 | 4 | 3.064 | 1 | 0.09118 | 206.37063 | 6.85404 | 0.66667 | 2 | 0.83333 |
| H6PD | 4 | 12 | 0.47366 | 4 | 2.644 | 2 | 0.09118 | 248.49087 | 7.68358 | 115.83725 | 2016 | 0.83333 |
| BRPF3 | 4 | 8 | 0.37893 | 4 | 16.185 | 1 | 0.11398 | 289.2631 | 8.24833 | 417.21426 | 8504 | 0.66667 |
| TMEM173 | 4 | 8 | 0.37893 | 4 | 10.94 | 1 | 0.11398 | 282.63333 | 8.17806 | 96.78507 | 972 | 0.66667 |
| FZD10 | 4 | 8 | 0.37893 | 4 | 5.273 | 1 | 0.11398 | 258.65595 | 7.85926 | 20.63878 | 858 | 0.66667 |
| TIMM23B | 4 | 8 | 0.37893 | 4 | 2.302 | 1 | 0.09118 | 190.85913 | 6.46926 | 1.2381 | 12 | 0.66667 |
| IMPDH2 | 4 | 8 | 0.37893 | 4 | 1.283 | 1 | 0.09118 | 178.69246 | 6.17446 | 698.62366 | 18662 | 0.66667 |
| SFPQ | 4 | 7 | 0.46346 | 3 | 37.381 | 2 | 0.10131 | 254.34603 | 7.68444 | 2126 | 116182 | 0.5 |
| SART3 | 4 | 7 | 0.46346 | 3 | 32.837 | 2 | 0.10131 | 256.12103 | 7.71529 | 2010.03726 | 90442 | 0.5 |
| GBA | 4 | 7 | 0.46346 | 3 | 14.439 | 1 | 0.11398 | 286.90357 | 8.21919 | 329.67839 | 5476 | 0.5 |
| MED16 | 4 | 7 | 0.46346 | 3 | 14.217 | 3 | 0.10131 | 296.25873 | 8.34002 | 1753.36695 | 20520 | 0.5 |
| PPP3CC | 4 | 7 | 0.46346 | 3 | 10.786 | 1 | 0.11398 | 265.00952 | 7.93982 | 678.21123 | 6196 | 0.5 |
| RHEB | 4 | 7 | 0.46346 | 3 | 4.631 | 1 | 0.10131 | 243.39087 | 7.6296 | 1790.09477 | 23230 | 0.5 |
| TIMP3 | 4 | 7 | 0.46346 | 3 | 3.64 | 4 | 0.10131 | 243.87937 | 7.64931 | 6366 | 82596 | 0.5 |
| H1F0 | 4 | 7 | 0.46346 | 3 | 2.093 | 2 | 0.08289 | 202.36551 | 6.72549 | 2126 | 58750 | 0.5 |
| INPPL1 | 4 | 5 | 0.30898 | 3 | 9.476 | 2 | 0.10131 | 275.95278 | 8.05208 | 2126.25 | 25532 | 0.33333 |
| GUK1 | 4 | 5 | 0.30898 | 3 | 1.599 | 3 | 0.10131 | 213.97619 | 7.07771 | 2114.08366 | 37680 | 0.33333 |
| TDP2 | 4 | 4 | 0.30779 | 2 | 30.311 | 3 | 0.11398 | 306.51667 | 8.41287 | 1527.95715 | 27774 | 0.16667 |
| DYNLT1 | 4 | 4 | 0.30779 | 2 | 17.982 | 3 | 0.11398 | 291.21905 | 8.28346 | 2264.62602 | 50286 | 0.33333 |
| ETS1 | 4 | 4 | 0.30779 | 2 | 9.815 | 2 | 0.10131 | 279.55992 | 8.12492 | 2392.88639 | 49890 | 0.16667 |
| RPS6KA3 | 4 | 4 | 0.30779 | 2 | 9.546 | 3 | 0.11398 | 291.17976 | 8.28775 | 665.69923 | 7162 | 0.16667 |
| CACNB3 | 4 | 4 | 0.30779 | 2 | 9.315 | 1 | 0.10131 | 276.80278 | 8.06494 | 1298.38345 | 16424 | 0.33333 |
| MSN | 4 | 4 | 0.30779 | 2 | 8.143 | 2 | 0.11398 | 299.99643 | 8.33659 | 321.06964 | 2714 | 0.16667 |
| HIPK2 | 4 | 4 | 0.30779 | 2 | 7.992 | 5 | 0.11398 | 282.21786 | 8.17891 | 1339.82774 | 10962 | 0.16667 |
| SLC9A3R1 | 4 | 4 | 0.30779 | 2 | 7.567 | 2 | 0.11398 | 280.02619 | 8.14635 | 280.96781 | 1872 | 0.16667 |
| NKX2-5 | 4 | 4 | 0.30779 | 2 | 5.328 | 4 | 0.10131 | 258.23611 | 7.86355 | 6370 | 57880 | 0.16667 |
| LPCAT3 | 4 | 4 | 0.30779 | 2 | 1.939 | 3 | 0.09118 | 222.92698 | 7.25339 | 4305.1271 | 74076 | 0.16667 |
| SDC3 | 4 | 4 | 0.30779 | 2 | 1.608 | 2 | 0.09118 | 240.58294 | 7.57561 | 1462.8895 | 16866 | 0.16667 |
| ST3GAL2 | 4 | 4 | 0.30779 | 2 | 1.313 | 1 | 0.00342 | 5.5 | 0.02153 | 9 | 18 | 0.16667 |
| GART | 4 | 4 | 0.30779 | 2 | 1.273 | 4 | 0.10131 | 223.65913 | 7.25767 | 7441.7406 | 127844 | 0.16667 |
| ST3GAL1 | 4 | 4 | 0.30779 | 2 | 1.265 | 3 | 0.00342 | 5.5 | 0.02153 | 9 | 18 | 0.16667 |
| GZMA | 4 | 4 | 0 | 1 | 6.975 | 4 | 0.10131 | 257.53135 | 7.82498 | 4737.32284 | 47414 | 0 |
| CNOT6 | 3 | 6 | 0.46346 | 3 | 19.415 | 1 | 0.10131 | 256.52341 | 7.79842 | 0 | 0 | 1 |
| TNKS1BP1 | 3 | 6 | 0.46346 | 3 | 18.697 | 1 | 0.10131 | 256.52341 | 7.79842 | 0 | 0 | 1 |
| MSL2 | 3 | 6 | 0.46346 | 3 | 16.464 | 1 | 0.11398 | 305.26905 | 8.44886 | 0 | 0 | 1 |
| CSNK1G2 | 3 | 6 | 0.46346 | 3 | 15.794 | 1 | 0.11398 | 290.0369 | 8.26975 | 0 | 0 | 1 |
| ATAD5 | 3 | 6 | 0.46346 | 3 | 14.33 | 1 | 0.10131 | 250.23016 | 7.67159 | 0 | 0 | 1 |
| ABL2 | 3 | 6 | 0.46346 | 3 | 12.288 | 1 | 0.11398 | 298.55357 | 8.32974 | 0 | 0 | 1 |
| PRKCH | 3 | 6 | 0.46346 | 3 | 10.854 | 1 | 0.10131 | 280.90278 | 8.13349 | 0 | 0 | 1 |
| FCER2 | 3 | 6 | 0.46346 | 3 | 8.865 | 1 | 0.10131 | 253.44008 | 7.753 | 0 | 0 | 1 |
| KLRC1 | 3 | 6 | 0.46346 | 3 | 7.434 | 1 | 0.10131 | 277.64325 | 8.1035 | 0 | 0 | 1 |
| VPS18 | 3 | 6 | 0.46346 | 3 | 6.931 | 1 | 0.11398 | 248.76786 | 7.71015 | 0 | 0 | 1 |
| VPS41 | 3 | 6 | 0.46346 | 3 | 6.89 | 1 | 0.11398 | 248.76786 | 7.71015 | 0 | 0 | 1 |
| TRAPPC13 | 3 | 6 | 0.46346 | 3 | 6.793 | 1 | 0.11398 | 250.55714 | 7.73243 | 0 | 0 | 1 |
| MED25 | 3 | 6 | 0.46346 | 3 | 6.786 | 1 | 0.10131 | 260.53611 | 7.88497 | 0 | 0 | 1 |
| TXK | 3 | 6 | 0.46346 | 3 | 6.639 | 1 | 0.10131 | 260.85754 | 7.85412 | 0 | 0 | 1 |
| RABEP1 | 3 | 6 | 0.46346 | 3 | 6.423 | 1 | 0.10131 | 241.7504 | 7.55247 | 0 | 0 | 1 |
| TRAPPC12 | 3 | 6 | 0.46346 | 3 | 6.23 | 1 | 0.11398 | 250.55714 | 7.73243 | 0 | 0 | 1 |
| VPS11 | 3 | 6 | 0.46346 | 3 | 6.216 | 1 | 0.11398 | 248.76786 | 7.71015 | 0 | 0 | 1 |
| MED6 | 3 | 6 | 0.46346 | 3 | 5.718 | 1 | 0.10131 | 260.53611 | 7.88497 | 0 | 0 | 1 |
| SH3D19 | 3 | 6 | 0.46346 | 3 | 5.232 | 1 | 0.10131 | 268.29921 | 7.93125 | 0 | 0 | 1 |
| TMED5 | 3 | 6 | 0.46346 | 3 | 4.902 | 1 | 0.10131 | 242.7254 | 7.5876 | 0 | 0 | 1 |
| PORCN | 3 | 6 | 0.46346 | 3 | 4.503 | 1 | 0.10131 | 242.7254 | 7.5876 | 0 | 0 | 1 |
| PEX16 | 3 | 6 | 0.46346 | 3 | 3.265 | 1 | 0.09118 | 205.87063 | 6.85318 | 0 | 0 | 1 |
| HMGA1 | 3 | 6 | 0.46346 | 3 | 2.434 | 1 | 0.08289 | 201.86551 | 6.72464 | 0 | 0 | 1 |
| HIST1H1D | 3 | 6 | 0.46346 | 3 | 1.714 | 1 | 0.08289 | 201.86551 | 6.72464 | 0 | 0 | 1 |
| PCK2 | 3 | 6 | 0.46346 | 3 | 1.594 | 1 | 0.10131 | 212.30595 | 6.99544 | 0 | 0 | 1 |
| CLEC3B | 3 | 6 | 0.46346 | 3 | 1.224 | 1 | 0.09118 | 197.5881 | 6.74006 | 0 | 0 | 1 |
| CDC37L1 | 3 | 6 | 0.46346 | 3 | 1.222 | 1 | 0.09118 | 197.5881 | 6.74006 | 0 | 0 | 1 |
| RARRES2 | 3 | 6 | 0.46346 | 3 | 1.211 | 1 | 0.09118 | 197.5881 | 6.74006 | 0 | 0 | 1 |
| ATP6V1F | 3 | 6 | 0.46346 | 3 | 1.211 | 1 | 0.00342 | 3 | 0.00571 | 0 | 0 | 1 |
| ENTPD4 | 3 | 6 | 0.46346 | 3 | 1.204 | 1 | 0.09118 | 178.19246 | 6.17361 | 0 | 0 | 1 |
| TCIRG1 | 3 | 6 | 0.46346 | 3 | 1.203 | 1 | 0.00342 | 3 | 0.00571 | 0 | 0 | 1 |
| ATP6V1H | 3 | 6 | 0.46346 | 3 | 1.199 | 1 | 0.00342 | 3 | 0.00571 | 0 | 0 | 1 |
| ATP6V0B | 3 | 6 | 0.46346 | 3 | 1.195 | 1 | 0.00342 | 3 | 0.00571 | 0 | 0 | 1 |
| SPEN | 3 | 4 | 0.30898 | 3 | 11.188 | 1 | 0.10131 | 272.04087 | 8.00066 | 15.64974 | 210 | 0.66667 |
| GTF3C5 | 3 | 4 | 0.30898 | 3 | 8.924 | 2 | 0.11398 | 277.54286 | 8.17206 | 228.47216 | 2400 | 0.66667 |
| GPAA1 | 3 | 4 | 0.30898 | 3 | 7.376 | 1 | 0.10131 | 242.33175 | 7.55504 | 1062 | 25160 | 0.66667 |
| PIGT | 3 | 4 | 0.30898 | 3 | 5.601 | 2 | 0.10131 | 242.33175 | 7.55504 | 1062 | 25160 | 0.66667 |
| WDR24 | 3 | 4 | 0.30898 | 3 | 3.99 | 1 | 0.09118 | 221.53849 | 7.22596 | 110.60533 | 2784 | 0.66667 |
| POLM | 3 | 4 | 0.30898 | 3 | 3.898 | 1 | 0.10131 | 243.16468 | 7.59789 | 1 | 2 | 0.66667 |
| NPRL3 | 3 | 4 | 0.30898 | 3 | 3.8 | 1 | 0.09118 | 221.53849 | 7.22596 | 110.60533 | 2784 | 0.66667 |
| VDAC2 | 3 | 4 | 0.30898 | 3 | 2.625 | 1 | 0.09118 | 190.19246 | 6.46755 | 0.37662 | 4 | 0.66667 |
| VDAC3 | 3 | 4 | 0.30898 | 3 | 2.225 | 1 | 0.09118 | 190.19246 | 6.46755 | 0.37662 | 4 | 0.66667 |
| AMT | 3 | 4 | 0.30898 | 3 | 1.551 | 1 | 0.10131 | 222.15913 | 7.25082 | 7.07143 | 20 | 0.66667 |
| ST6GALNAC4 | 3 | 4 | 0.30898 | 3 | 1.238 | 1 | 0.00342 | 5 | 0.02055 | 0.5 | 2 | 0.66667 |
| LIN9 | 3 | 3 | 0.30779 | 2 | 22.241 | 1 | 0.11398 | 298.78214 | 8.34688 | 389.15733 | 12496 | 0.33333 |
| SNX4 | 3 | 3 | 0.30779 | 2 | 15.901 | 3 | 0.13026 | 304.21429 | 8.43343 | 6532.38953 | 45972 | 0.33333 |
| CFLAR | 3 | 3 | 0.30779 | 2 | 12.185 | 1 | 0.11398 | 262.05714 | 7.9124 | 234.34408 | 7118 | 0.33333 |
| NGLY1 | 3 | 3 | 0.30779 | 2 | 12.009 | 1 | 0.13026 | 293.95476 | 8.34259 | 239.15512 | 2042 | 0.33333 |
| MLXIPL | 3 | 3 | 0.30779 | 2 | 11.686 | 3 | 0.11398 | 298.18333 | 8.36402 | 4248 | 46680 | 0.33333 |
| LIN7B | 3 | 3 | 0.30779 | 2 | 11.339 | 1 | 0.11398 | 293.92381 | 8.27489 | 701.41109 | 6180 | 0.33333 |
| PPM1B | 3 | 3 | 0.30779 | 2 | 10.063 | 1 | 0.11398 | 277.5619 | 8.12064 | 117.90533 | 1370 | 0.33333 |
| ANPEP | 3 | 3 | 0.30779 | 2 | 8.477 | 4 | 0.10131 | 243.83175 | 7.57046 | 6366 | 77976 | 0.33333 |
| FGFR4 | 3 | 3 | 0.30779 | 2 | 8.418 | 3 | 0.10131 | 282.79206 | 8.14035 | 1475.8946 | 16218 | 0.33333 |
| MAP4K1 | 3 | 3 | 0.30779 | 2 | 7.615 | 1 | 0.10131 | 272.92897 | 8.05037 | 17.72293 | 178 | 0.33333 |
| IL6R | 3 | 3 | 0.30779 | 2 | 6.108 | 1 | 0.10131 | 261.38016 | 7.85498 | 19.23907 | 144 | 0.33333 |
| RASSF5 | 3 | 3 | 0.30779 | 2 | 5.825 | 3 | 0.10131 | 260.88611 | 7.83013 | 4248 | 38104 | 0.33333 |
| DERA | 3 | 3 | 0.30779 | 2 | 4.645 | 2 | 0.10131 | 259.98135 | 7.82413 | 505.94049 | 4722 | 0.33333 |
| STX10 | 3 | 3 | 0.30779 | 2 | 4.509 | 2 | 0.11398 | 256.06786 | 7.81899 | 2126 | 21838 | 0.33333 |
| CAMK2D | 3 | 3 | 0.30779 | 2 | 4.381 | 1 | 0.10131 | 272.83611 | 8.07779 | 777.74299 | 7832 | 0.33333 |
| IDUA | 3 | 3 | 0.30779 | 2 | 3.905 | 2 | 0.11398 | 242.68929 | 7.6116 | 2126 | 25782 | 0.33333 |
| RGS19 | 3 | 3 | 0.30779 | 2 | 3.66 | 2 | 0.11398 | 257.7369 | 7.8207 | 277.93648 | 2124 | 0.33333 |
| TGM1 | 3 | 3 | 0.30779 | 2 | 3.578 | 2 | 0.10131 | 253.09802 | 7.75471 | 2126 | 14490 | 0.33333 |
| ABHD5 | 3 | 3 | 0.30779 | 2 | 3.08 | 1 | 0.09118 | 222.01032 | 7.24996 | 57.1271 | 1252 | 0.33333 |
| GPC1 | 3 | 3 | 0.30779 | 2 | 2.531 | 1 | 0.09118 | 234.93849 | 7.45734 | 1023.78251 | 14574 | 0.33333 |
| MBOAT7 | 3 | 3 | 0.30779 | 2 | 2.424 | 1 | 0.09118 | 222.01032 | 7.24996 | 57.1271 | 1252 | 0.33333 |
| NLGN2 | 3 | 3 | 0.30779 | 2 | 2.357 | 2 | 0.10131 | 236.23968 | 7.49248 | 2126 | 27392 | 0.33333 |
| GIPC1 | 3 | 3 | 0.30779 | 2 | 2.28 | 1 | 0.11398 | 239.77619 | 7.57818 | 123.67877 | 4108 | 0.33333 |
| SCYL1 | 3 | 3 | 0.30779 | 2 | 2.116 | 1 | 0.10131 | 237.89206 | 7.49848 | 893.99752 | 5292 | 0.33333 |
| GCLM | 3 | 3 | 0.30779 | 2 | 1.676 | 2 | 0.09118 | 197.04325 | 6.66208 | 2126 | 25996 | 0.33333 |
| KARS | 3 | 3 | 0.30779 | 2 | 1.208 | 7 | 0.002 | 4.33333 | 0.03196 | 16 | 16 | 0.33333 |
| TARS | 3 | 3 | 0.30779 | 2 | 1.191 | 7 | 0.002 | 4.33333 | 0.03196 | 16 | 16 | 0.33333 |
| MAPK7 | 3 | 3 | 0 | 1 | 11.85 | 3 | 0.11398 | 288.68333 | 8.25347 | 2432.53389 | 28408 | 0 |
| PI4KA | 3 | 3 | 0 | 1 | 11.668 | 2 | 0.11398 | 300.86548 | 8.39487 | 518.74901 | 8780 | 0 |
| FER | 3 | 3 | 0 | 1 | 6.464 | 1 | 0.11398 | 287.95357 | 8.25004 | 254.47138 | 3216 | 0 |
| PTPRC | 3 | 3 | 0 | 1 | 4.816 | 1 | 0.10131 | 256.07063 | 7.78642 | 12.67237 | 90 | 0 |
| TNNC2 | 3 | 3 | 0 | 1 | 4.07 | 3 | 0.10131 | 254.53254 | 7.80099 | 4250 | 33038 | 0 |
| ACSS2 | 3 | 3 | 0 | 1 | 3.519 | 4 | 0.10131 | 253.68849 | 7.74614 | 7992.46683 | 58238 | 0 |
| SEMA3B | 3 | 3 | 0 | 1 | 3.462 | 1 | 0.10131 | 263.99444 | 7.93639 | 602.06586 | 6188 | 0 |
| NME4 | 3 | 3 | 0 | 1 | 1.8 | 2 | 0.09118 | 216.74167 | 7.09056 | 2683.48048 | 36598 | 0 |
| PDE6D | 3 | 3 | 0 | 1 | 1.614 | 2 | 0.09118 | 209.91548 | 7.00315 | 2160.24925 | 26044 | 0 |
| OR5B3 | 3 | 3 | 0 | 1 | 1.277 | 1 | 0.00428 | 6 | 0.01427 | 0.85714 | 6 | 0 |
| OR52K2 | 3 | 3 | 0 | 1 | 1.265 | 1 | 0.00428 | 6 | 0.01427 | 0.85714 | 6 | 0 |
| OR6N1 | 3 | 3 | 0 | 1 | 1.264 | 1 | 0.00428 | 6 | 0.01427 | 0.85714 | 6 | 0 |
| OR6N2 | 3 | 3 | 0 | 1 | 1.251 | 1 | 0.00428 | 6 | 0.01427 | 0.85714 | 6 | 0 |
| OR6S1 | 3 | 3 | 0 | 1 | 1.249 | 1 | 0.00428 | 6 | 0.01427 | 0.85714 | 6 | 0 |
| OR52B2 | 3 | 3 | 0 | 1 | 1.247 | 1 | 0.00428 | 6 | 0.01427 | 0.85714 | 6 | 0 |
| OR4A16 | 3 | 3 | 0 | 1 | 1.242 | 1 | 0.00428 | 6 | 0.01427 | 0.85714 | 6 | 0 |
| SAE1 | 2 | 2 | 0.30779 | 2 | 26.654 | 1 | 0.11398 | 282.21429 | 8.13264 | 0 | 0 | 1 |
| PKMYT1 | 2 | 2 | 0.30779 | 2 | 25.866 | 1 | 0.11398 | 296.89881 | 8.33574 | 0 | 0 | 1 |
| HNRNPH3 | 2 | 2 | 0.30779 | 2 | 25.585 | 1 | 0.10131 | 249.79722 | 7.63559 | 0 | 0 | 1 |
| ACIN1 | 2 | 2 | 0.30779 | 2 | 25.446 | 1 | 0.10131 | 257.89087 | 7.76671 | 0 | 0 | 1 |
| CCNB3 | 2 | 2 | 0.30779 | 2 | 25.333 | 1 | 0.11398 | 296.89881 | 8.33574 | 0 | 0 | 1 |
| RBMX2 | 2 | 2 | 0.30779 | 2 | 25.332 | 1 | 0.10131 | 273.93651 | 8.0238 | 0 | 0 | 1 |
| SRPK1 | 2 | 2 | 0.30779 | 2 | 23.038 | 1 | 0.10131 | 258.99087 | 7.77957 | 0 | 0 | 1 |
| PATL1 | 2 | 2 | 0.30779 | 2 | 21.551 | 1 | 0.10131 | 248.58056 | 7.62274 | 0 | 0 | 1 |
| ABT1 | 2 | 2 | 0.30779 | 2 | 17.32 | 1 | 0.10131 | 245.14881 | 7.57989 | 0 | 0 | 1 |
| BCL3 | 2 | 2 | 0.30779 | 2 | 17.158 | 1 | 0.11398 | 285.25357 | 8.21233 | 0 | 0 | 1 |
| PTBP2 | 2 | 2 | 0.30779 | 2 | 15.094 | 1 | 0.10131 | 255.85675 | 7.7967 | 0 | 0 | 1 |
| PPP1R12C | 2 | 2 | 0.30779 | 2 | 14.434 | 1 | 0.10131 | 270.89325 | 8.02037 | 0 | 0 | 1 |
| SKIL | 2 | 2 | 0.30779 | 2 | 13.427 | 1 | 0.10131 | 261.25635 | 7.84469 | 0 | 0 | 1 |
| PPP1R3B | 2 | 2 | 0.30779 | 2 | 13.109 | 1 | 0.10131 | 270.89325 | 8.02037 | 0 | 0 | 1 |
| RAP1GDS1 | 2 | 2 | 0.30779 | 2 | 12.558 | 1 | 0.11398 | 301.4869 | 8.35802 | 0 | 0 | 1 |
| SMC6 | 2 | 2 | 0.30779 | 2 | 12.469 | 1 | 0.10131 | 262.72778 | 7.91411 | 0 | 0 | 1 |
| AMFR | 2 | 2 | 0.30779 | 2 | 11.083 | 1 | 0.13026 | 282.98571 | 8.22176 | 0 | 0 | 1 |
| ENSG00000258947 | 2 | 2 | 0.30779 | 2 | 10.808 | 1 | 0.10131 | 258.82778 | 7.88497 | 0 | 0 | 1 |
| RASAL3 | 2 | 2 | 0.30779 | 2 | 10.517 | 1 | 0.11398 | 252.925 | 7.81813 | 0 | 0 | 1 |
| LMO2 | 2 | 2 | 0.30779 | 2 | 10.338 | 1 | 0.11398 | 281.88571 | 8.14978 | 0 | 0 | 1 |
| HINT1 | 2 | 2 | 0.30779 | 2 | 10.332 | 1 | 0.11398 | 275.81786 | 8.08122 | 0 | 0 | 1 |
| NSMCE4A | 2 | 2 | 0.30779 | 2 | 10.198 | 1 | 0.10131 | 262.72778 | 7.91411 | 0 | 0 | 1 |
| KCNJ15 | 2 | 2 | 0.30779 | 2 | 9.725 | 1 | 0.10131 | 266.52421 | 7.93639 | 0 | 0 | 1 |
| NR1H2 | 2 | 2 | 0.30779 | 2 | 9.169 | 1 | 0.11398 | 261.28095 | 7.92439 | 0 | 0 | 1 |
| RNGTT | 2 | 2 | 0.30779 | 2 | 8.574 | 1 | 0.10131 | 269.34325 | 7.9621 | 0 | 0 | 1 |
| POFUT1 | 2 | 2 | 0.30779 | 2 | 8.346 | 1 | 0.10131 | 254.83056 | 7.78042 | 0 | 0 | 1 |
| PPP4C | 2 | 2 | 0.30779 | 2 | 7.946 | 1 | 0.10131 | 266.20635 | 7.91154 | 0 | 0 | 1 |
| KCNJ10 | 2 | 2 | 0.30779 | 2 | 7.908 | 1 | 0.10131 | 266.52421 | 7.93639 | 0 | 0 | 1 |
| MEMO1 | 2 | 2 | 0.30779 | 2 | 7.663 | 1 | 0.11398 | 287.21429 | 8.22947 | 0 | 0 | 1 |
| LILRB3 | 2 | 2 | 0.30779 | 2 | 7.645 | 1 | 0.10131 | 277.14325 | 8.10264 | 0 | 0 | 1 |
| RGL1 | 2 | 2 | 0.30779 | 2 | 7.61 | 1 | 0.10131 | 255.04444 | 7.82584 | 0 | 0 | 1 |
| KIAA0391 | 2 | 2 | 0.30779 | 2 | 7.552 | 1 | 0.10131 | 240.45833 | 7.53019 | 0 | 0 | 1 |
| DICER1 | 2 | 2 | 0.30779 | 2 | 7.453 | 1 | 0.10131 | 240.45833 | 7.53019 | 0 | 0 | 1 |
| ATP2A1 | 2 | 2 | 0.30779 | 2 | 7.105 | 1 | 0.10131 | 254.83056 | 7.78042 | 0 | 0 | 1 |
| RFNG | 2 | 2 | 0.30779 | 2 | 7.087 | 1 | 0.10131 | 254.83056 | 7.78042 | 0 | 0 | 1 |
| PHLPP2 | 2 | 2 | 0.30779 | 2 | 6.79 | 1 | 0.11398 | 261.85 | 7.93982 | 0 | 0 | 1 |
| RNF125 | 2 | 2 | 0.30779 | 2 | 6.534 | 1 | 0.10131 | 244.59722 | 7.64159 | 0 | 0 | 1 |
| DENND1A | 2 | 2 | 0.30779 | 2 | 6.437 | 1 | 0.11398 | 261.85 | 7.93982 | 0 | 0 | 1 |
| PTCRA | 2 | 2 | 0.30779 | 2 | 6.412 | 1 | 0.10131 | 248.73532 | 7.69387 | 0 | 0 | 1 |
| MBD6 | 2 | 2 | 0.30779 | 2 | 6.355 | 1 | 0.10131 | 254.30516 | 7.81042 | 0 | 0 | 1 |
| MFNG | 2 | 2 | 0.30779 | 2 | 6.013 | 1 | 0.10131 | 254.83056 | 7.78042 | 0 | 0 | 1 |
| TOP2B | 2 | 2 | 0.30779 | 2 | 5.544 | 1 | 0.10131 | 262.80079 | 7.93382 | 0 | 0 | 1 |
| APLF | 2 | 2 | 0.30779 | 2 | 5.222 | 1 | 0.10131 | 242.66468 | 7.59703 | 0 | 0 | 1 |
| PLCD3 | 2 | 2 | 0.30779 | 2 | 4.816 | 1 | 0.10131 | 246.31587 | 7.66387 | 0 | 0 | 1 |
| PNP | 2 | 2 | 0.30779 | 2 | 4.585 | 1 | 0.11398 | 247.37738 | 7.69644 | 0 | 0 | 1 |
| MTERF3 | 2 | 2 | 0.30779 | 2 | 4.185 | 1 | 0.10131 | 243.49087 | 7.66302 | 0 | 0 | 1 |
| HYAL2 | 2 | 2 | 0.30779 | 2 | 4.171 | 1 | 0.11398 | 242.18929 | 7.61074 | 0 | 0 | 1 |
| PKP2 | 2 | 2 | 0.30779 | 2 | 3.823 | 1 | 0.10131 | 252.59802 | 7.75386 | 0 | 0 | 1 |
| POLL | 2 | 2 | 0.30779 | 2 | 3.17 | 1 | 0.10131 | 242.66468 | 7.59703 | 0 | 0 | 1 |
| GTF3C6 | 2 | 2 | 0.30779 | 2 | 3.127 | 1 | 0.10131 | 251.11508 | 7.79842 | 0 | 0 | 1 |
| AP5M1 | 2 | 2 | 0.30779 | 2 | 2.702 | 1 | 0.10131 | 221.56865 | 7.19426 | 0 | 0 | 1 |
| SYT5 | 2 | 2 | 0.30779 | 2 | 2.458 | 1 | 0.10131 | 240.31349 | 7.57475 | 0 | 0 | 1 |
| SSH3 | 2 | 2 | 0.30779 | 2 | 2.401 | 1 | 0.10131 | 253.06468 | 7.8027 | 0 | 0 | 1 |
| AP5Z1 | 2 | 2 | 0.30779 | 2 | 2.25 | 1 | 0.10131 | 221.56865 | 7.19426 | 0 | 0 | 1 |
| HOMER3 | 2 | 2 | 0.30779 | 2 | 2.159 | 1 | 0.10131 | 235.73968 | 7.49162 | 0 | 0 | 1 |
| GPD1L | 2 | 2 | 0.30779 | 2 | 1.968 | 1 | 0.09118 | 221.04365 | 7.24567 | 0 | 0 | 1 |
| PEF1 | 2 | 2 | 0.30779 | 2 | 1.855 | 1 | 0.10131 | 225.60794 | 7.27824 | 0 | 0 | 1 |
| GSS | 2 | 2 | 0.30779 | 2 | 1.796 | 1 | 0.09118 | 196.54325 | 6.66122 | 0 | 0 | 1 |
| MTHFR | 2 | 2 | 0.30779 | 2 | 1.716 | 1 | 0.10131 | 220.89246 | 7.2431 | 0 | 0 | 1 |
| OGDHL | 2 | 2 | 0.30779 | 2 | 1.65 | 1 | 0.10131 | 202.01468 | 6.77348 | 0 | 0 | 1 |
| PFKL | 2 | 2 | 0.30779 | 2 | 1.537 | 1 | 0.09118 | 232.99444 | 7.43678 | 0 | 0 | 1 |
| PIGF | 2 | 2 | 0.30779 | 2 | 1.509 | 1 | 0.09118 | 195.49325 | 6.64494 | 0 | 0 | 1 |
| GK5 | 2 | 2 | 0.30779 | 2 | 1.463 | 1 | 0.09118 | 221.04365 | 7.24567 | 0 | 0 | 1 |
| SCAP | 2 | 2 | 0.30779 | 2 | 1.246 | 1 | 0.08289 | 166.27031 | 5.76055 | 0 | 0 | 1 |
| STK4 | 2 | 2 | 0.30779 | 2 | 1.166 | 1 | 0.09118 | 207.18294 | 6.92003 | 0 | 0 | 1 |
| AMPD3 | 2 | 2 | 0.30779 | 2 | 1.16 | 1 | 0.08289 | 152.56371 | 5.26693 | 0 | 0 | 1 |
| MMAB | 2 | 2 | 0.30779 | 2 | 1.155 | 1 | 0.08289 | 167.73301 | 5.82739 | 0 | 0 | 1 |
| NDST1 | 2 | 2 | 0.30779 | 2 | 1.155 | 1 | 0.08289 | 199.56234 | 6.76834 | 0 | 0 | 1 |
| RASSF1 | 2 | 2 | 0.30779 | 2 | 1.146 | 1 | 0.09118 | 207.18294 | 6.92003 | 0 | 0 | 1 |
| INSIG1 | 2 | 2 | 0.30779 | 2 | 1.145 | 1 | 0.08289 | 166.27031 | 5.76055 | 0 | 0 | 1 |
| EMC7 | 2 | 2 | 0.30779 | 2 | 1.134 | 1 | 0.00257 | 2 | 0.00514 | 0 | 0 | 1 |
| MMAA | 2 | 2 | 0.30779 | 2 | 1.131 | 1 | 0.08289 | 167.73301 | 5.82739 | 0 | 0 | 1 |
| TARSL2 | 2 | 2 | 0.30779 | 2 | 1.13 | 1 | 0.002 | 3.66667 | 0.02997 | 0 | 0 | 1 |
| EMC8 | 2 | 2 | 0.30779 | 2 | 1.129 | 1 | 0.00257 | 2 | 0.00514 | 0 | 0 | 1 |
| KRT8 | 2 | 2 | 0.30779 | 2 | 1.123 | 1 | 0.00257 | 2 | 0.00514 | 0 | 0 | 1 |
| KRT38 | 2 | 2 | 0.30779 | 2 | 1.123 | 1 | 0.00257 | 2 | 0.00514 | 0 | 0 | 1 |
| EMC10 | 2 | 2 | 0.30779 | 2 | 1.123 | 1 | 0.00257 | 2 | 0.00514 | 0 | 0 | 1 |
| KRT13 | 2 | 2 | 0.30779 | 2 | 1.114 | 1 | 0.00257 | 2 | 0.00514 | 0 | 0 | 1 |
| NAA16 | 2 | 2 | 0.30779 | 2 | 1.107 | 1 | 0.00257 | 2 | 0.00514 | 0 | 0 | 1 |
| NAA35 | 2 | 2 | 0.30779 | 2 | 1.105 | 1 | 0.00257 | 2 | 0.00514 | 0 | 0 | 1 |
| NAA25 | 2 | 2 | 0.30779 | 2 | 1.102 | 1 | 0.00257 | 2 | 0.00514 | 0 | 0 | 1 |
| MASTL | 2 | 2 | 0 | 1 | 13.486 | 1 | 0.10131 | 279.43492 | 8.13092 | 62.68603 | 692 | 0 |
| C1QBP | 2 | 2 | 0 | 1 | 12.639 | 2 | 0.10131 | 259.15754 | 7.78042 | 2126 | 33074 | 0 |
| PPP2R2D | 2 | 2 | 0 | 1 | 12.63 | 1 | 0.11398 | 283.43333 | 8.19348 | 88.80469 | 3872 | 0 |
| RBM15 | 2 | 2 | 0 | 1 | 12.537 | 2 | 0.10131 | 258.05754 | 7.76757 | 2126 | 33504 | 0 |
| IL18R1 | 2 | 2 | 0 | 1 | 12.209 | 2 | 0.11398 | 285.42024 | 8.21319 | 2126 | 24976 | 0 |
| GORAB | 2 | 2 | 0 | 1 | 11.08 | 2 | 0.11398 | 257.05833 | 7.79928 | 1410.97221 | 19822 | 0 |
| RBM39 | 2 | 2 | 0 | 1 | 10.088 | 3 | 0.10131 | 274.35317 | 8.02637 | 4248 | 56272 | 0 |
| RGS14 | 2 | 2 | 0 | 1 | 8.4 | 1 | 0.10131 | 270.58492 | 7.94239 | 160.60767 | 1578 | 0 |
| ACVRL1 | 2 | 2 | 0 | 1 | 6.979 | 1 | 0.10131 | 264.49683 | 7.94924 | 123.06695 | 774 | 0 |
| RPGR | 2 | 2 | 0 | 1 | 6.668 | 3 | 0.10131 | 249.30397 | 7.73415 | 2487.32115 | 28650 | 0 |
| RDH11 | 2 | 2 | 0 | 1 | 6.63 | 2 | 0.10131 | 242.16508 | 7.55847 | 2126 | 25132 | 0 |
| MMP14 | 2 | 2 | 0 | 1 | 6.584 | 1 | 0.10131 | 249.37897 | 7.65959 | 6.82143 | 28 | 0 |
| ELOVL6 | 2 | 2 | 0 | 1 | 6.215 | 6 | 0.10131 | 244.44841 | 7.57475 | 10590 | 126190 | 0 |
| ATRX | 2 | 2 | 0 | 1 | 5.483 | 1 | 0.10131 | 257.91944 | 7.83612 | 416.92863 | 2320 | 0 |
| ERLEC1 | 2 | 2 | 0 | 1 | 5.293 | 2 | 0.11398 | 227.64048 | 7.38707 | 2126 | 106212 | 0 |
| SET | 2 | 2 | 0 | 1 | 4.746 | 4 | 0.11398 | 253.10714 | 7.82584 | 972.07993 | 11402 | 0 |
| MAP3K4 | 2 | 2 | 0 | 1 | 4.64 | 1 | 0.11398 | 260.85 | 7.93382 | 0.72527 | 8 | 0 |
| NEIL1 | 2 | 2 | 0 | 1 | 4.472 | 2 | 0.09118 | 229.725 | 7.3348 | 2126 | 34126 | 0 |
| IL15 | 2 | 2 | 0 | 1 | 4.298 | 1 | 0.11398 | 278.11429 | 8.15235 | 32.80153 | 480 | 0 |
| SYNE3 | 2 | 2 | 0 | 1 | 3.951 | 1 | 0.10131 | 244.94206 | 7.63988 | 179.50851 | 2758 | 0 |
| GOLGA4 | 2 | 2 | 0 | 1 | 3.917 | 1 | 0.10131 | 232.36032 | 7.36479 | 30.70394 | 198 | 0 |
| MEPCE | 2 | 2 | 0 | 1 | 3.215 | 1 | 0.09118 | 207.27222 | 6.87118 | 172.00283 | 6288 | 0 |
| SLC9A3 | 2 | 2 | 0 | 1 | 2.764 | 1 | 0.11398 | 260.01786 | 7.89868 | 12.71933 | 134 | 0 |
| PPP2R3B | 2 | 2 | 0 | 1 | 1.895 | 2 | 0.09118 | 221.93095 | 7.2551 | 2126 | 35766 | 0 |
| MTERF1 | 2 | 2 | 0 | 1 | 1.806 | 3 | 0.09118 | 198.39087 | 6.68007 | 4248 | 56772 | 0 |
| HEXIM1 | 2 | 2 | 0 | 1 | 1.734 | 1 | 0.09118 | 216.88135 | 7.10256 | 283.96557 | 2628 | 0 |
| MLX | 2 | 2 | 0 | 1 | 1.641 | 2 | 0.10131 | 230.78889 | 7.45477 | 2126 | 23342 | 0 |
| PNISR | 2 | 2 | 0 | 1 | 1.57 | 2 | 0.09118 | 215.87579 | 7.11713 | 2126 | 28138 | 0 |
| ST6GALNAC1 | 2 | 2 | 0 | 1 | 1.165 | 1 | 0.00228 | 4.16667 | 0.01761 | 0.5 | 2 | 0 |
| PEMT | 2 | 2 | 0 | 1 | 1.16 | 2 | 0.08289 | 183.25916 | 6.34414 | 2126 | 36414 | 0 |
| PPAT | 2 | 2 | 0 | 1 | 1.152 | 3 | 0.09118 | 183.86548 | 6.35014 | 4248 | 67048 | 0 |
| CAD | 2 | 2 | 0 | 1 | 1.151 | 2 | 0.08289 | 156.55285 | 5.4409 | 2126 | 33526 | 0 |
| FUT1 | 2 | 2 | 0 | 1 | 1.146 | 1 | 0.00228 | 4.16667 | 0.01761 | 0.5 | 2 | 0 |
| IARS2 | 2 | 2 | 0 | 1 | 1.134 | 2 | 0.0015 | 3.58333 | 0.02897 | 10 | 10 | 0 |
| LEPRE1 | 2 | 2 | 0 | 1 | 1.132 | 3 | 0.00257 | 2 | 0.00899 | 2 | 2 | 0 |
| BMP7 | 2 | 2 | 0 | 1 | 1.127 | 2 | 0.09118 | 206.3504 | 6.9543 | 2126 | 19296 | 0 |
| GABPA | 2 | 2 | 0 | 1 | 1.125 | 2 | 0.08289 | 166.50722 | 5.77083 | 2126 | 28388 | 0 |
| ISCU | 2 | 2 | 0 | 1 | 1.125 | 3 | 0.00257 | 2 | 0.00899 | 2 | 2 | 0 |
| FARSA | 2 | 2 | 0 | 1 | 1.123 | 2 | 0.0015 | 3.58333 | 0.02897 | 10 | 10 | 0 |
| GET4 | 2 | 2 | 0 | 1 | 1.115 | 3 | 0.00257 | 2 | 0.00899 | 2 | 2 | 0 |
| STRN4 | 2 | 2 | 0 | 1 | 1.112 | 1 | 0.00171 | 2.5 | 0.00913 | 1 | 2 | 0 |
| GID8 | 2 | 2 | 0 | 1 | 1.112 | 3 | 0.00257 | 2 | 0.00899 | 2 | 2 | 0 |
| TXN2 | 2 | 2 | 0 | 1 | 1.108 | 3 | 0.00257 | 2 | 0.00899 | 2 | 2 | 0 |
| MST4 | 2 | 2 | 0 | 1 | 1.108 | 1 | 0.00171 | 2.5 | 0.00913 | 1 | 2 | 0 |
| STK25 | 2 | 2 | 0 | 1 | 1.106 | 1 | 0.00171 | 2.5 | 0.00913 | 1 | 2 | 0 |
| STRN3 | 2 | 2 | 0 | 1 | 1.106 | 1 | 0.00171 | 2.5 | 0.00913 | 1 | 2 | 0 |
| PAFAH1B3 | 1 | 1 | 0 | 1 | 15.356 | 1 | 0.11398 | 280.26905 | 8.17806 | 0 | 0 | 0 |
| RGPD2 | 1 | 1 | 0 | 1 | 13.272 | 1 | 0.10131 | 257.97421 | 7.8644 | 0 | 0 | 0 |
| SAFB | 1 | 1 | 0 | 1 | 13.238 | 1 | 0.10131 | 249.29722 | 7.63474 | 0 | 0 | 0 |
| TIA1 | 1 | 1 | 0 | 1 | 13.139 | 1 | 0.10131 | 247.78056 | 7.61931 | 0 | 0 | 0 |
| HSPB11 | 1 | 1 | 0 | 1 | 12.704 | 1 | 0.11398 | 270.11905 | 8.04265 | 0 | 0 | 0 |
| MIDN | 1 | 1 | 0 | 1 | 12.646 | 1 | 0.10131 | 247.61389 | 7.61845 | 0 | 0 | 0 |
| LYAR | 1 | 1 | 0 | 1 | 12.165 | 1 | 0.10131 | 244.39881 | 7.57732 | 0 | 0 | 0 |
| GORASP2 | 1 | 1 | 0 | 1 | 11.424 | 1 | 0.11398 | 287.86786 | 8.23376 | 0 | 0 | 0 |
| DENR | 1 | 1 | 0 | 1 | 11.352 | 1 | 0.10131 | 256.175 | 7.74871 | 0 | 0 | 0 |
| MKNK1 | 1 | 1 | 0 | 1 | 9.487 | 1 | 0.10131 | 255.35675 | 7.79585 | 0 | 0 | 0 |
| TEN1-CDK3 | 1 | 1 | 0 | 1 | 9.427 | 1 | 0.10131 | 278.76825 | 8.12921 | 0 | 0 | 0 |
| SPPL2B | 1 | 1 | 0 | 1 | 9.178 | 1 | 0.11398 | 266.46429 | 7.99552 | 0 | 0 | 0 |
| SEPT1 | 1 | 1 | 0 | 1 | 8.589 | 1 | 0.11398 | 272.02619 | 8.06065 | 0 | 0 | 0 |
| SENP2 | 1 | 1 | 0 | 1 | 8.475 | 1 | 0.10131 | 257.97421 | 7.8644 | 0 | 0 | 0 |
| BMF | 1 | 1 | 0 | 1 | 7.996 | 1 | 0.11398 | 270.11905 | 8.04265 | 0 | 0 | 0 |
| NIPA1 | 1 | 1 | 0 | 1 | 7.544 | 1 | 0.10131 | 247.12063 | 7.71529 | 0 | 0 | 0 |
| ESRRA | 1 | 1 | 0 | 1 | 7.513 | 1 | 0.11398 | 276.37619 | 8.16949 | 0 | 0 | 0 |
| TSR2 | 1 | 1 | 0 | 1 | 6.7 | 1 | 0.10131 | 243.97103 | 7.58846 | 0 | 0 | 0 |
| DNLZ | 1 | 1 | 0 | 1 | 6.54 | 1 | 0.10131 | 228.93294 | 7.35537 | 0 | 0 | 0 |
| ARFIP2 | 1 | 1 | 0 | 1 | 6.422 | 1 | 0.11398 | 296.3369 | 8.31688 | 0 | 0 | 0 |
| DNAJC1 | 1 | 1 | 0 | 1 | 6.35 | 1 | 0.10131 | 228.93294 | 7.35537 | 0 | 0 | 0 |
| TRUB1 | 1 | 1 | 0 | 1 | 6.172 | 1 | 0.10131 | 238.34762 | 7.53019 | 0 | 0 | 0 |
| PLEKHG6 | 1 | 1 | 0 | 1 | 6.147 | 1 | 0.11398 | 284.19048 | 8.19348 | 0 | 0 | 0 |
| HSPE1 | 1 | 1 | 0 | 1 | 5.936 | 1 | 0.10131 | 228.93294 | 7.35537 | 0 | 0 | 0 |
| PDE3B | 1 | 1 | 0 | 1 | 5.911 | 1 | 0.11398 | 261.35 | 7.93896 | 0 | 0 | 0 |
| LILRB1 | 1 | 1 | 0 | 1 | 5.717 | 1 | 0.10131 | 271.82063 | 8.03494 | 0 | 0 | 0 |
| RASGRP1 | 1 | 1 | 0 | 1 | 5.608 | 1 | 0.10131 | 259.55278 | 7.8267 | 0 | 0 | 0 |
| RHPN1 | 1 | 1 | 0 | 1 | 5.54 | 1 | 0.11398 | 284.19048 | 8.19348 | 0 | 0 | 0 |
| RALGAPB | 1 | 1 | 0 | 1 | 5.517 | 1 | 0.11398 | 261.35 | 7.93896 | 0 | 0 | 0 |
| CD151 | 1 | 1 | 0 | 1 | 5.488 | 1 | 0.10131 | 218.58373 | 7.16769 | 0 | 0 | 0 |
| GSDMB | 1 | 1 | 0 | 1 | 5.392 | 1 | 0.10131 | 240.91508 | 7.55075 | 0 | 0 | 0 |
| RGS10 | 1 | 1 | 0 | 1 | 5.056 | 1 | 0.10131 | 242.80159 | 7.58675 | 0 | 0 | 0 |
| TBC1D17 | 1 | 1 | 0 | 1 | 4.773 | 1 | 0.11398 | 247.76786 | 7.70844 | 0 | 0 | 0 |
| CITED2 | 1 | 1 | 0 | 1 | 4.761 | 1 | 0.10131 | 244.5627 | 7.64159 | 0 | 0 | 0 |
| LILRB4 | 1 | 1 | 0 | 1 | 4.647 | 1 | 0.10131 | 271.82063 | 8.03494 | 0 | 0 | 0 |
| ELOVL1 | 1 | 1 | 0 | 1 | 4.482 | 1 | 0.10131 | 242.78175 | 7.56618 | 0 | 0 | 0 |
| CDKN2B | 1 | 1 | 0 | 1 | 4.451 | 1 | 0.10131 | 249.87222 | 7.69215 | 0 | 0 | 0 |
| NCR1 | 1 | 1 | 0 | 1 | 4.437 | 1 | 0.09118 | 241.69325 | 7.55075 | 0 | 0 | 0 |
| CR1 | 1 | 1 | 0 | 1 | 4.403 | 1 | 0.10131 | 251.97897 | 7.78214 | 0 | 0 | 0 |
| PLK3 | 1 | 1 | 0 | 1 | 4.387 | 1 | 0.10131 | 239.54802 | 7.49591 | 0 | 0 | 0 |
| CD1D | 1 | 1 | 0 | 1 | 4.353 | 1 | 0.10131 | 271.82063 | 8.03494 | 0 | 0 | 0 |
| NLRP7 | 1 | 1 | 0 | 1 | 4.309 | 1 | 0.11398 | 243.55833 | 7.64845 | 0 | 0 | 0 |
| SOX17 | 1 | 1 | 0 | 1 | 4.149 | 1 | 0.10131 | 243.41032 | 7.61674 | 0 | 0 | 0 |
| IMMT | 1 | 1 | 0 | 1 | 4.101 | 1 | 0.10131 | 228.93294 | 7.35537 | 0 | 0 | 0 |
| HBP1 | 1 | 1 | 0 | 1 | 4.1 | 1 | 0.10131 | 236.31508 | 7.49762 | 0 | 0 | 0 |
| SS18 | 1 | 1 | 0 | 1 | 4.048 | 1 | 0.10131 | 255.3627 | 7.86098 | 0 | 0 | 0 |
| PDK2 | 1 | 1 | 0 | 1 | 4.029 | 1 | 0.10131 | 253.03849 | 7.8087 | 0 | 0 | 0 |
| KIDINS220 | 1 | 1 | 0 | 1 | 3.968 | 1 | 0.10131 | 259.55278 | 7.8267 | 0 | 0 | 0 |
| SYTL2 | 1 | 1 | 0 | 1 | 3.965 | 1 | 0.10131 | 241.57421 | 7.57818 | 0 | 0 | 0 |
| ATXN3 | 1 | 1 | 0 | 1 | 3.763 | 1 | 0.10131 | 251.09802 | 7.77957 | 0 | 0 | 0 |
| OTUB1 | 1 | 1 | 0 | 1 | 3.735 | 1 | 0.11398 | 284.19048 | 8.19348 | 0 | 0 | 0 |
| IPO5 | 1 | 1 | 0 | 1 | 3.665 | 1 | 0.09118 | 210.83214 | 6.94573 | 0 | 0 | 0 |
| SIRPG | 1 | 1 | 0 | 1 | 3.564 | 1 | 0.10131 | 245.64563 | 7.62531 | 0 | 0 | 0 |
| COBL | 1 | 1 | 0 | 1 | 3.533 | 1 | 0.10131 | 234.75635 | 7.4762 | 0 | 0 | 0 |
| TAPBP | 1 | 1 | 0 | 1 | 3.5 | 1 | 0.10131 | 271.82063 | 8.03494 | 0 | 0 | 0 |
| FCGRT | 1 | 1 | 0 | 1 | 3.462 | 1 | 0.10131 | 271.82063 | 8.03494 | 0 | 0 | 0 |
| NAB2 | 1 | 1 | 0 | 1 | 3.359 | 1 | 0.10131 | 234.47262 | 7.4762 | 0 | 0 | 0 |
| RECQL | 1 | 1 | 0 | 1 | 3.325 | 1 | 0.09118 | 222.88452 | 7.23967 | 0 | 0 | 0 |
| ABCB1 | 1 | 1 | 0 | 1 | 3.253 | 1 | 0.09118 | 238.63968 | 7.49505 | 0 | 0 | 0 |
| LLGL1 | 1 | 1 | 0 | 1 | 3.182 | 1 | 0.10131 | 236.18849 | 7.55504 | 0 | 0 | 0 |
| PSPC1 | 1 | 1 | 0 | 1 | 3.143 | 1 | 0.09118 | 201.925 | 6.77348 | 0 | 0 | 0 |
| RIC8A | 1 | 1 | 0 | 1 | 3.036 | 1 | 0.10131 | 242.80159 | 7.58675 | 0 | 0 | 0 |
| SYTL1 | 1 | 1 | 0 | 1 | 2.976 | 1 | 0.10131 | 241.57421 | 7.57818 | 0 | 0 | 0 |
| MAP3K10 | 1 | 1 | 0 | 1 | 2.821 | 1 | 0.10131 | 246.99921 | 7.71101 | 0 | 0 | 0 |
| TLR9 | 1 | 1 | 0 | 1 | 2.734 | 1 | 0.10131 | 241.75397 | 7.62702 | 0 | 0 | 0 |
| EPN3 | 1 | 1 | 0 | 1 | 2.689 | 1 | 0.10131 | 234.75635 | 7.4762 | 0 | 0 | 0 |
| FOSL1 | 1 | 1 | 0 | 1 | 2.641 | 1 | 0.10131 | 228.25397 | 7.3845 | 0 | 0 | 0 |
| SGPL1 | 1 | 1 | 0 | 1 | 2.502 | 1 | 0.10131 | 233.30635 | 7.50105 | 0 | 0 | 0 |
| PPP2R2B | 1 | 1 | 0 | 1 | 2.477 | 1 | 0.10131 | 247.66825 | 7.70415 | 0 | 0 | 0 |
| RPAP1 | 1 | 1 | 0 | 1 | 2.389 | 1 | 0.09118 | 205.95079 | 6.87546 | 0 | 0 | 0 |
| SMPD4 | 1 | 1 | 0 | 1 | 2.374 | 1 | 0.10131 | 231.38611 | 7.42392 | 0 | 0 | 0 |
| RNF11 | 1 | 1 | 0 | 1 | 2.367 | 1 | 0.10131 | 216.81746 | 7.19511 | 0 | 0 | 0 |
| TRIM33 | 1 | 1 | 0 | 1 | 2.324 | 1 | 0.09118 | 224.54841 | 7.28338 | 0 | 0 | 0 |
| TOPORS | 1 | 1 | 0 | 1 | 2.233 | 1 | 0.10131 | 221.17103 | 7.26795 | 0 | 0 | 0 |
| CREB5 | 1 | 1 | 0 | 1 | 2.203 | 1 | 0.10131 | 228.25397 | 7.3845 | 0 | 0 | 0 |
| GRK6 | 1 | 1 | 0 | 1 | 2.142 | 1 | 0.09118 | 223.21587 | 7.26453 | 0 | 0 | 0 |
| ITGB8 | 1 | 1 | 0 | 1 | 2.089 | 1 | 0.10131 | 231.77698 | 7.45992 | 0 | 0 | 0 |
| STARD10 | 1 | 1 | 0 | 1 | 2.079 | 1 | 0.10131 | 232.38571 | 7.47363 | 0 | 0 | 0 |
| FAM71F2 | 1 | 1 | 0 | 1 | 2.053 | 1 | 0.10131 | 219.43056 | 7.16255 | 0 | 0 | 0 |
| TRPV6 | 1 | 1 | 0 | 1 | 2.031 | 1 | 0.09118 | 229.37897 | 7.36222 | 0 | 0 | 0 |
| IPO4 | 1 | 1 | 0 | 1 | 1.991 | 1 | 0.09118 | 224.54841 | 7.28338 | 0 | 0 | 0 |
| SIGIRR | 1 | 1 | 0 | 1 | 1.962 | 1 | 0.10131 | 222.53452 | 7.30223 | 0 | 0 | 0 |
| SEMA4A | 1 | 1 | 0 | 1 | 1.927 | 1 | 0.09118 | 225.90476 | 7.30566 | 0 | 0 | 0 |
| STXBP5 | 1 | 1 | 0 | 1 | 1.923 | 1 | 0.10131 | 231.60079 | 7.44021 | 0 | 0 | 0 |
| SEMA4G | 1 | 1 | 0 | 1 | 1.912 | 1 | 0.09118 | 225.90476 | 7.30566 | 0 | 0 | 0 |
| CXXC1 | 1 | 1 | 0 | 1 | 1.912 | 1 | 0.10131 | 226.91746 | 7.35879 | 0 | 0 | 0 |
| F12 | 1 | 1 | 0 | 1 | 1.85 | 1 | 0.09118 | 205.30595 | 6.86946 | 0 | 0 | 0 |
| JAM3 | 1 | 1 | 0 | 1 | 1.846 | 1 | 0.10131 | 231.77698 | 7.45992 | 0 | 0 | 0 |
| DP2 | 1 | 1 | 0 | 1 | 1.829 | 1 | 0.09118 | 221.26429 | 7.25339 | 0 | 0 | 0 |
| RBM15B | 1 | 1 | 0 | 1 | 1.579 | 1 | 0.09118 | 204.64881 | 6.85661 | 0 | 0 | 0 |
| PDLIM4 | 1 | 1 | 0 | 1 | 1.565 | 1 | 0.10131 | 210.44246 | 6.9963 | 0 | 0 | 0 |
| PLEKHA1 | 1 | 1 | 0 | 1 | 1.471 | 1 | 0.09118 | 206.09365 | 6.91917 | 0 | 0 | 0 |
| MGAT5 | 1 | 1 | 0 | 1 | 1.446 | 1 | 0.09118 | 213.83929 | 7.05371 | 0 | 0 | 0 |
| IGSF8 | 1 | 1 | 0 | 1 | 1.435 | 1 | 0.10131 | 231.77698 | 7.45992 | 0 | 0 | 0 |
| MGAT3 | 1 | 1 | 0 | 1 | 1.413 | 1 | 0.09118 | 213.83929 | 7.05371 | 0 | 0 | 0 |
| PDLIM7 | 1 | 1 | 0 | 1 | 1.394 | 1 | 0.09118 | 203.42183 | 6.89003 | 0 | 0 | 0 |
| ID1 | 1 | 1 | 0 | 1 | 1.377 | 1 | 0.09118 | 218.74524 | 7.21397 | 0 | 0 | 0 |
| GNPTAB | 1 | 1 | 0 | 1 | 1.373 | 1 | 0.09118 | 221.6869 | 7.27995 | 0 | 0 | 0 |
| SGSH | 1 | 1 | 0 | 1 | 1.328 | 1 | 0.10131 | 195.72976 | 6.70064 | 0 | 0 | 0 |
| AGXT2 | 1 | 1 | 0 | 1 | 1.327 | 1 | 0.08289 | 164.95245 | 5.75112 | 0 | 0 | 0 |
| FPGS | 1 | 1 | 0 | 1 | 1.312 | 1 | 0.10131 | 220.39246 | 7.24225 | 0 | 0 | 0 |
| TBX2 | 1 | 1 | 0 | 1 | 1.311 | 1 | 0.09118 | 205.68373 | 6.95259 | 0 | 0 | 0 |
| MYOD1 | 1 | 1 | 0 | 1 | 1.286 | 1 | 0.10131 | 224.37698 | 7.34251 | 0 | 0 | 0 |
| GNLY | 1 | 1 | 0 | 1 | 1.269 | 1 | 0.09118 | 204.86548 | 6.91403 | 0 | 0 | 0 |
| RHOBTB3 | 1 | 1 | 0 | 1 | 1.262 | 1 | 0.10131 | 204.1881 | 6.90803 | 0 | 0 | 0 |
| ITPK1 | 1 | 1 | 0 | 1 | 1.253 | 1 | 0.09118 | 216.06587 | 7.14112 | 0 | 0 | 0 |
| LCE1A | 1 | 1 | 0 | 1 | 1.251 | 1 | 0.09118 | 202.27262 | 6.84375 | 0 | 0 | 0 |
| GZMK | 1 | 1 | 0 | 1 | 1.113 | 1 | 0.09118 | 204.86548 | 6.91403 | 0 | 0 | 0 |
| PLEKHA2 | 1 | 1 | 0 | 1 | 1.111 | 1 | 0.09118 | 206.09365 | 6.91917 | 0 | 0 | 0 |
| B3GNT9 | 1 | 1 | 0 | 1 | 1.089 | 1 | 0.00228 | 3.66667 | 0.01663 | 0 | 0 | 0 |
| H1FX | 1 | 1 | 0 | 1 | 1.083 | 1 | 0.07598 | 168.16017 | 5.81453 | 0 | 0 | 0 |
| EPB41L5 | 1 | 1 | 0 | 1 | 1.082 | 1 | 0.09118 | 191.55397 | 6.58152 | 0 | 0 | 0 |
| TM7SF2 | 1 | 1 | 0 | 1 | 1.081 | 1 | 0.08289 | 165.77031 | 5.75969 | 0 | 0 | 0 |
| RNF152 | 1 | 1 | 0 | 1 | 1.079 | 1 | 0.09118 | 196.37063 | 6.71864 | 0 | 0 | 0 |
| HERPUD1 | 1 | 1 | 0 | 1 | 1.079 | 1 | 0.09118 | 190.30159 | 6.54724 | 0 | 0 | 0 |
| PLD3 | 1 | 1 | 0 | 1 | 1.077 | 1 | 0.07598 | 155.54809 | 5.43318 | 0 | 0 | 0 |
| STARD4 | 1 | 1 | 0 | 1 | 1.076 | 1 | 0.00171 | 1 | 0.00514 | 0 | 0 | 0 |
| STARD3 | 1 | 1 | 0 | 1 | 1.076 | 1 | 0.00171 | 1 | 0.00514 | 0 | 0 | 0 |
| NARS2 | 1 | 1 | 0 | 1 | 1.076 | 1 | 0.0012 | 2.61667 | 0.02397 | 0 | 0 | 0 |
| SUCLA2 | 1 | 1 | 0 | 1 | 1.075 | 1 | 0.08289 | 167.23301 | 5.82653 | 0 | 0 | 0 |
| SGTA | 1 | 1 | 0 | 1 | 1.074 | 1 | 0.00128 | 1.5 | 0.00771 | 0 | 0 | 0 |
| ARL13B | 1 | 1 | 0 | 1 | 1.073 | 1 | 0.08289 | 174.06194 | 6.09219 | 0 | 0 | 0 |
| GABPB2 | 1 | 1 | 0 | 1 | 1.072 | 1 | 0.07598 | 143.22338 | 4.85987 | 0 | 0 | 0 |
| NAPEPLD | 1 | 1 | 0 | 1 | 1.072 | 1 | 0.00171 | 1 | 0.00514 | 0 | 0 | 0 |
| FAAH | 1 | 1 | 0 | 1 | 1.072 | 1 | 0.00171 | 1 | 0.00514 | 0 | 0 | 0 |
| DHCR7 | 1 | 1 | 0 | 1 | 1.072 | 1 | 0.08289 | 165.77031 | 5.75969 | 0 | 0 | 0 |
| LEPREL2 | 1 | 1 | 0 | 1 | 1.071 | 1 | 0.00128 | 1.5 | 0.00771 | 0 | 0 | 0 |
| SRM | 1 | 1 | 0 | 1 | 1.071 | 1 | 0.00171 | 1 | 0.00514 | 0 | 0 | 0 |
| AMD1 | 1 | 1 | 0 | 1 | 1.071 | 1 | 0.00171 | 1 | 0.00514 | 0 | 0 | 0 |
| SERPINH1 | 1 | 1 | 0 | 1 | 1.069 | 1 | 0.00128 | 1.5 | 0.00771 | 0 | 0 | 0 |
| SOD1 | 1 | 1 | 0 | 1 | 1.068 | 1 | 0.00171 | 1 | 0.00514 | 0 | 0 | 0 |
| PRDX1 | 1 | 1 | 0 | 1 | 1.068 | 1 | 0.00171 | 1 | 0.00514 | 0 | 0 | 0 |
| RMND5B | 1 | 1 | 0 | 1 | 1.068 | 1 | 0.00128 | 1.5 | 0.00771 | 0 | 0 | 0 |
| FDX1 | 1 | 1 | 0 | 1 | 1.068 | 1 | 0.00128 | 1.5 | 0.00771 | 0 | 0 | 0 |
| ASS1 | 1 | 1 | 0 | 1 | 1.068 | 1 | 0.07598 | 135.92872 | 4.52994 | 0 | 0 | 0 |
| ACSF3 | 1 | 1 | 0 | 1 | 1.068 | 1 | 0.08289 | 167.23301 | 5.82653 | 0 | 0 | 0 |
| SPRY4 | 1 | 1 | 0 | 1 | 1.067 | 1 | 0.00171 | 1 | 0.00514 | 0 | 0 | 0 |
| SPRY3 | 1 | 1 | 0 | 1 | 1.067 | 1 | 0.00171 | 1 | 0.00514 | 0 | 0 | 0 |
| POMT2 | 1 | 1 | 0 | 1 | 1.067 | 1 | 0.00171 | 1 | 0.00514 | 0 | 0 | 0 |
| POMGNT1 | 1 | 1 | 0 | 1 | 1.067 | 1 | 0.00171 | 1 | 0.00514 | 0 | 0 | 0 |
| GALNT12 | 1 | 1 | 0 | 1 | 1.067 | 1 | 0.00228 | 3.66667 | 0.01663 | 0 | 0 | 0 |
| CMPK1 | 1 | 1 | 0 | 1 | 1.067 | 1 | 0.08289 | 178.33853 | 6.1796 | 0 | 0 | 0 |
| FLOT2 | 1 | 1 | 0 | 1 | 1.066 | 1 | 0.00171 | 1 | 0.00514 | 0 | 0 | 0 |
| FLOT1 | 1 | 1 | 0 | 1 | 1.066 | 1 | 0.00171 | 1 | 0.00514 | 0 | 0 | 0 |
| OGG1 | 1 | 1 | 0 | 1 | 1.065 | 1 | 0.08289 | 187.07266 | 6.42384 | 0 | 0 | 0 |
| ISCA1 | 1 | 1 | 0 | 1 | 1.065 | 1 | 0.00128 | 1.5 | 0.00771 | 0 | 0 | 0 |
| SCAF1 | 1 | 1 | 0 | 1 | 1.064 | 1 | 0.00171 | 1 | 0.00514 | 0 | 0 | 0 |
| PRR12 | 1 | 1 | 0 | 1 | 1.064 | 1 | 0.00171 | 1 | 0.00514 | 0 | 0 | 0 |
| LRRC47 | 1 | 1 | 0 | 1 | 1.064 | 1 | 0.0012 | 2.61667 | 0.02397 | 0 | 0 | 0 |
| GDF7 | 1 | 1 | 0 | 1 | 1.064 | 1 | 0.08289 | 171.9298 | 6.04335 | 0 | 0 | 0 |
| TMOD3 | 1 | 1 | 0 | 1 | 1.063 | 1 | 0.09118 | 203.42183 | 6.89003 | 0 | 0 | 0 |
| TEAD4 | 1 | 1 | 0 | 1 | 1.062 | 1 | 0.00171 | 1 | 0.00514 | 0 | 0 | 0 |
| TEAD2 | 1 | 1 | 0 | 1 | 1.062 | 1 | 0.00171 | 1 | 0.00514 | 0 | 0 | 0 |
| LMF2 | 1 | 1 | 0 | 1 | 1.062 | 1 | 0.00171 | 1 | 0.00514 | 0 | 0 | 0 |
| LMF1 | 1 | 1 | 0 | 1 | 1.062 | 1 | 0.00171 | 1 | 0.00514 | 0 | 0 | 0 |
| ALKBH7 | 1 | 1 | 0 | 1 | 1.062 | 1 | 0.00171 | 1 | 0.00514 | 0 | 0 | 0 |
| ALKBH6 | 1 | 1 | 0 | 1 | 1.062 | 1 | 0.00171 | 1 | 0.00514 | 0 | 0 | 0 |
| SLC39A4 | 1 | 1 | 0 | 1 | 1.061 | 1 | 0.00171 | 1 | 0.00514 | 0 | 0 | 0 |
| SLC39A1 | 1 | 1 | 0 | 1 | 1.061 | 1 | 0.00171 | 1 | 0.00514 | 0 | 0 | 0 |
| PPME1 | 1 | 1 | 0 | 1 | 1.061 | 1 | 0.08289 | 182.35599 | 6.34414 | 0 | 0 | 0 |
| STIM1 | 1 | 1 | 0 | 1 | 1.061 | 1 | 0.00171 | 1 | 0.00514 | 0 | 0 | 0 |
| ORAI1 | 1 | 1 | 0 | 1 | 1.061 | 1 | 0.00171 | 1 | 0.00514 | 0 | 0 | 0 |
| RER1 | 1 | 1 | 0 | 1 | 1.061 | 1 | 0.00171 | 1 | 0.00514 | 0 | 0 | 0 |
| BCAP31 | 1 | 1 | 0 | 1 | 1.061 | 1 | 0.00171 | 1 | 0.00514 | 0 | 0 | 0 |
| PYCR2 | 1 | 1 | 0 | 1 | 1.06 | 1 | 0.00171 | 1 | 0.00514 | 0 | 0 | 0 |
| PYCR1 | 1 | 1 | 0 | 1 | 1.06 | 1 | 0.00171 | 1 | 0.00514 | 0 | 0 | 0 |
| SLC6A9 | 1 | 1 | 0 | 1 | 1.06 | 1 | 0.00171 | 1 | 0.00514 | 0 | 0 | 0 |
| HMGN3 | 1 | 1 | 0 | 1 | 1.06 | 1 | 0.00171 | 1 | 0.00514 | 0 | 0 | 0 |
| RTCB | 1 | 1 | 0 | 1 | 1.06 | 1 | 0.00171 | 1 | 0.00514 | 0 | 0 | 0 |
| FAM98B | 1 | 1 | 0 | 1 | 1.06 | 1 | 0.00171 | 1 | 0.00514 | 0 | 0 | 0 |
| RNF185 | 1 | 1 | 0 | 1 | 1.059 | 1 | 0.10131 | 186.23373 | 6.47612 | 0 | 0 | 0 |
| RANBP10 | 1 | 1 | 0 | 1 | 1.058 | 1 | 0.00128 | 1.5 | 0.00771 | 0 | 0 | 0 |
| TBC1D13 | 1 | 1 | 0 | 1 | 1.058 | 1 | 0.00171 | 1 | 0.00514 | 0 | 0 | 0 |
| C9orf114 | 1 | 1 | 0 | 1 | 1.058 | 1 | 0.00171 | 1 | 0.00514 | 0 | 0 | 0 |
| TXNIP | 1 | 1 | 0 | 1 | 1.057 | 1 | 0.00128 | 1.5 | 0.00771 | 0 | 0 | 0 |
| SBF1 | 1 | 1 | 0 | 1 | 1.056 | 1 | 0.00171 | 1 | 0.00514 | 0 | 0 | 0 |
| MTMR2 | 1 | 1 | 0 | 1 | 1.056 | 1 | 0.00171 | 1 | 0.00514 | 0 | 0 | 0 |
| ALDH1A1 | 1 | 1 | 0 | 1 | 1.056 | 1 | 0.09118 | 195.03373 | 6.64751 | 0 | 0 | 0 |
| GBE1 | 1 | 1 | 0 | 1 | 1.056 | 1 | 0.00171 | 1 | 0.00514 | 0 | 0 | 0 |
| AGL | 1 | 1 | 0 | 1 | 1.056 | 1 | 0.00171 | 1 | 0.00514 | 0 | 0 | 0 |
| TXNRD2 | 1 | 1 | 0 | 1 | 1.055 | 1 | 0.00128 | 1.5 | 0.00771 | 0 | 0 | 0 |
| MLXIP | 1 | 1 | 0 | 1 | 1.053 | 1 | 0.09118 | 188.52341 | 6.54382 | 0 | 0 | 0 |
| ELP5 | 1 | 1 | 0 | 1 | 1.053 | 1 | 0.00171 | 1 | 0.00514 | 0 | 0 | 0 |
| ELP3 | 1 | 1 | 0 | 1 | 1.053 | 1 | 0.00171 | 1 | 0.00514 | 0 | 0 | 0 |
| PVRL2 | 1 | 1 | 0 | 1 | 1.052 | 1 | 0.00171 | 1 | 0.00514 | 0 | 0 | 0 |
| PVRL1 | 1 | 1 | 0 | 1 | 1.052 | 1 | 0.00171 | 1 | 0.00514 | 0 | 0 | 0 |
| LUC7L3 | 1 | 1 | 0 | 1 | 1.051 | 1 | 0.08289 | 178.2215 | 6.20617 | 0 | 0 | 0 |
| PLOD3 | 1 | 1 | 0 | 1 | 1.045 | 1 | 0.00171 | 1 | 0.00514 | 0 | 0 | 0 |
| PLOD1 | 1 | 1 | 0 | 1 | 1.045 | 1 | 0.00171 | 1 | 0.00514 | 0 | 0 | 0 |
| BAG6 | 1 | 1 | 0 | 1 | 1.045 | 1 | 0.00128 | 1.5 | 0.00771 | 0 | 0 | 0 |

Supplementary Table 3. GO and KEGG analyses information for hub genes.

| ONTOLOGY | ID | Description | pvalue | p.adjust | geneID |
| --- | --- | --- | --- | --- | --- |
| BP | GO:0008380 | RNA splicing | 1.16048E-12 | 7.57136E-10 | MAGOH/PIK3R1/SRSF1/SRSF7/SNRPD1/SNRPD3/SNRPE/SNRPF/ALYREF/SNW1/SF3B1/CPSF2 |
| BP | GO:0043687 | post-translational protein modification | 1.94265E-12 | 7.57136E-10 | GAN/CUL1/BTRC/FBXL3/FBXO2/KLHL20/FBXW5/KBTBD7/SPSB2/KBTBD13/ASB18 |
| BP | GO:0000377 | RNA splicing, via transesterification reactions with bulged adenosine as nucleophile | 3.29167E-12 | 7.57136E-10 | MAGOH/SRSF1/SRSF7/SNRPD1/SNRPD3/SNRPE/SNRPF/ALYREF/SNW1/SF3B1/CPSF2 |
| BP | GO:0000398 | mRNA splicing, via spliceosome | 3.29167E-12 | 7.57136E-10 | MAGOH/SRSF1/SRSF7/SNRPD1/SNRPD3/SNRPE/SNRPF/ALYREF/SNW1/SF3B1/CPSF2 |
| BP | GO:0000375 | RNA splicing, via transesterification reactions | 3.58492E-12 | 7.57136E-10 | MAGOH/SRSF1/SRSF7/SNRPD1/SNRPD3/SNRPE/SNRPF/ALYREF/SNW1/SF3B1/CPSF2 |
| BP | GO:0006913 | nucleocytoplasmic transport | 3.76103E-11 | 6.18069E-09 | MAGOH/PIK3R1/SRSF1/SRSF7/SNRPD1/SNRPD3/SNRPE/SNRPF/ALYREF/CPSF2 |
| BP | GO:0051169 | nuclear transport | 4.09705E-11 | 6.18069E-09 | MAGOH/PIK3R1/SRSF1/SRSF7/SNRPD1/SNRPD3/SNRPE/SNRPF/ALYREF/CPSF2 |
| BP | GO:0043161 | proteasome-mediated ubiquitin-dependent protein catabolic process | 6.27504E-09 | 8.28305E-07 | PLK1/CUL1/BTRC/ANAPC10/FBXL3/FBXO2/KLHL20/FBXW5/SPSB2 |
| BP | GO:0010498 | proteasomal protein catabolic process | 1.92955E-08 | 2.26401E-06 | PLK1/CUL1/BTRC/ANAPC10/FBXL3/FBXO2/KLHL20/FBXW5/SPSB2 |
| BP | GO:0008334 | histone mRNA metabolic process | 5.00843E-08 | 5.28891E-06 | SNRPD3/SNRPE/SNRPF/CPSF2 |
| BP | GO:0006369 | termination of RNA polymerase II transcription | 2.05183E-07 | 1.96976E-05 | SNRPD3/SNRPE/SNRPF/CPSF2 |
| BP | GO:0031146 | SCF-dependent proteasomal ubiquitin-dependent protein catabolic process | 2.7476E-07 | 2.31859E-05 | CUL1/BTRC/FBXL3/FBXO2/FBXW5 |
| BP | GO:0000209 | protein polyubiquitination | 2.85432E-07 | 2.31859E-05 | CUL1/BTRC/ANAPC10/FBXL3/FBXO2/KLHL20/FBXW5 |
| BP | GO:0031124 | mRNA 3'-end processing | 3.21048E-07 | 2.42162E-05 | MAGOH/SRSF1/SRSF7/ALYREF/CPSF2 |
| BP | GO:0006406 | mRNA export from nucleus | 5.97845E-07 | 3.94578E-05 | MAGOH/SRSF1/SRSF7/ALYREF/CPSF2 |
| BP | GO:0071427 | mRNA-containing ribonucleoprotein complex export from nucleus | 5.97845E-07 | 3.94578E-05 | MAGOH/SRSF1/SRSF7/ALYREF/CPSF2 |
| BP | GO:0000387 | spliceosomal snRNP assembly | 1.12643E-06 | 6.7401E-05 | SNRPD1/SNRPD3/SNRPE/SNRPF |
| BP | GO:0071426 | ribonucleoprotein complex export from nucleus | 1.16654E-06 | 6.7401E-05 | MAGOH/SRSF1/SRSF7/ALYREF/CPSF2 |
| BP | GO:0071166 | ribonucleoprotein complex localization | 1.21271E-06 | 6.7401E-05 | MAGOH/SRSF1/SRSF7/ALYREF/CPSF2 |
| BP | GO:0006405 | RNA export from nucleus | 1.57778E-06 | 7.93396E-05 | MAGOH/SRSF1/SRSF7/ALYREF/CPSF2 |
| BP | GO:0043484 | regulation of RNA splicing | 1.57778E-06 | 7.93396E-05 | MAGOH/PIK3R1/SRSF1/SRSF7/SNW1 |
| BP | GO:0031123 | RNA 3'-end processing | 2.65101E-06 | 0.000127249 | MAGOH/SRSF1/SRSF7/ALYREF/CPSF2 |
| BP | GO:0051028 | mRNA transport | 2.82923E-06 | 0.000127292 | MAGOH/SRSF1/SRSF7/ALYREF/CPSF2 |
| BP | GO:0022618 | ribonucleoprotein complex assembly | 2.893E-06 | 0.000127292 | SRSF1/SNRPD1/SNRPD3/SNRPE/SNRPF/SF3B1 |
| BP | GO:0071826 | ribonucleoprotein complex subunit organization | 3.84402E-06 | 0.000161854 | SRSF1/SNRPD1/SNRPD3/SNRPE/SNRPF/SF3B1 |
| BP | GO:0051170 | import into nucleus | 3.98505E-06 | 0.000161854 | PIK3R1/SNRPD1/SNRPD3/SNRPE/SNRPF |
| BP | GO:0006353 | DNA-templated transcription, termination | 4.57088E-06 | 0.000178772 | SNRPD3/SNRPE/SNRPF/CPSF2 |
| BP | GO:0006611 | protein export from nucleus | 6.29546E-06 | 0.000237429 | MAGOH/SRSF1/SRSF7/ALYREF/CPSF2 |
| BP | GO:0000245 | spliceosomal complex assembly | 7.18927E-06 | 0.000261789 | SRSF1/SNRPD1/SNRPE/SF3B1 |
| BP | GO:0050657 | nucleic acid transport | 9.07973E-06 | 0.000307241 | MAGOH/SRSF1/SRSF7/ALYREF/CPSF2 |
| BP | GO:0050658 | RNA transport | 9.07973E-06 | 0.000307241 | MAGOH/SRSF1/SRSF7/ALYREF/CPSF2 |
| BP | GO:0051168 | nuclear export | 9.31034E-06 | 0.000307241 | MAGOH/SRSF1/SRSF7/ALYREF/CPSF2 |
| BP | GO:0051236 | establishment of RNA localization | 9.7853E-06 | 0.00031313 | MAGOH/SRSF1/SRSF7/ALYREF/CPSF2 |
| BP | GO:0048024 | regulation of mRNA splicing, via spliceosome | 1.32667E-05 | 0.000412048 | MAGOH/SRSF1/SRSF7/SNW1 |
| BP | GO:0006403 | RNA localization | 2.11854E-05 | 0.000639193 | MAGOH/SRSF1/SRSF7/ALYREF/CPSF2 |
| BP | GO:0015931 | nucleobase-containing compound transport | 2.65112E-05 | 0.000777662 | MAGOH/SRSF1/SRSF7/ALYREF/CPSF2 |
| BP | GO:0031648 | protein destabilization | 4.39184E-05 | 0.001253454 | PLK1/BTRC/FBXL3 |
| BP | GO:0050684 | regulation of mRNA processing | 4.95491E-05 | 0.001376944 | MAGOH/SRSF1/SRSF7/SNW1 |
| BP | GO:0031503 | protein-containing complex localization | 5.51509E-05 | 0.001493318 | MAGOH/SRSF1/SRSF7/ALYREF/CPSF2 |
| BP | GO:0038095 | Fc-epsilon receptor signaling pathway | 0.000111958 | 0.002955689 | PIK3R1/RAC1/CUL1/BTRC |
| BP | GO:0000381 | regulation of alternative mRNA splicing, via spliceosome | 0.000123987 | 0.003193416 | MAGOH/SRSF1/SRSF7 |
| BP | GO:0070507 | regulation of microtubule cytoskeleton organization | 0.000161953 | 0.004071963 | RHOA/PLK1/RAC1/FBXW5 |
| BP | GO:0000380 | alternative mRNA splicing, via spliceosome | 0.000197358 | 0.004846751 | MAGOH/SRSF1/SRSF7 |
| BP | GO:0051492 | regulation of stress fiber assembly | 0.00026536 | 0.006368635 | RHOA/PIK3R1/RAC1 |
| BP | GO:0032886 | regulation of microtubule-based process | 0.000297126 | 0.006972565 | RHOA/PLK1/RAC1/FBXW5 |
| BP | GO:0110020 | regulation of actomyosin structure organization | 0.000381248 | 0.008752133 | RHOA/PIK3R1/RAC1 |
| BP | GO:0048010 | vascular endothelial growth factor receptor signaling pathway | 0.000393152 | 0.00882125 | RHOA/PIK3R1/RAC1 |
| BP | GO:0032231 | regulation of actin filament bundle assembly | 0.000405293 | 0.00882125 | RHOA/PIK3R1/RAC1 |
| BP | GO:0030038 | contractile actin filament bundle assembly | 0.000417673 | 0.00882125 | RHOA/PIK3R1/RAC1 |
| BP | GO:0043149 | stress fiber assembly | 0.000417673 | 0.00882125 | RHOA/PIK3R1/RAC1 |
| BP | GO:0038093 | Fc receptor signaling pathway | 0.000434566 | 0.008998081 | PIK3R1/RAC1/CUL1/BTRC |
| BP | GO:1904375 | regulation of protein localization to cell periphery | 0.000666574 | 0.013536576 | PIK3R1/PLK1/VAMP8 |
| BP | GO:0001952 | regulation of cell-matrix adhesion | 0.000736277 | 0.014669973 | RHOA/PIK3R1/RAC1 |
| BP | GO:0031647 | regulation of protein stability | 0.000804815 | 0.015738599 | PIK3R1/PLK1/BTRC/FBXL3 |
| BP | GO:0033120 | positive regulation of RNA splicing | 0.001181204 | 0.022679109 | PIK3R1/SNW1 |
| BP | GO:1903311 | regulation of mRNA metabolic process | 0.001311806 | 0.024736914 | MAGOH/SRSF1/SRSF7/SNW1 |
| BP | GO:0051017 | actin filament bundle assembly | 0.001521074 | 0.028179889 | RHOA/PIK3R1/RAC1 |
| BP | GO:0061572 | actin filament bundle organization | 0.001637779 | 0.029818876 | RHOA/PIK3R1/RAC1 |
| BP | GO:0002696 | positive regulation of leukocyte activation | 0.002349617 | 0.042054167 | RHOA/PIK3R1/RAC1/VAMP8 |
| BP | GO:0038061 | NIK/NF-kappaB signaling | 0.002533977 | 0.044597995 | RHOA/CUL1/BTRC |
| BP | GO:0051496 | positive regulation of stress fiber assembly | 0.002642621 | 0.04561534 | RHOA/RAC1 |
| BP | GO:0050867 | positive regulation of cell activation | 0.002678173 | 0.04561534 | RHOA/PIK3R1/RAC1/VAMP8 |
| BP | GO:0031295 | T cell costimulation | 0.003177138 | 0.051255819 | PIK3R1/RAC1 |
| BP | GO:0045292 | mRNA cis splicing, via spliceosome | 0.003177138 | 0.051255819 | SRSF1/SRSF7 |
| BP | GO:0090307 | mitotic spindle assembly | 0.003177138 | 0.051255819 | RHOA/PLK1 |
| BP | GO:0031032 | actomyosin structure organization | 0.003210982 | 0.051255819 | RHOA/PIK3R1/RAC1 |
| BP | GO:0031294 | lymphocyte costimulation | 0.003289626 | 0.051255819 | PIK3R1/RAC1 |
| BP | GO:0050852 | T cell receptor signaling pathway | 0.003349102 | 0.051255819 | PIK3R1/CUL1/BTRC |
| BP | GO:0050870 | positive regulation of T cell activation | 0.003349102 | 0.051255819 | RHOA/PIK3R1/RAC1 |
| BP | GO:0051893 | regulation of focal adhesion assembly | 0.00363816 | 0.054111232 | RHOA/RAC1 |
| BP | GO:0090109 | regulation of cell-substrate junction assembly | 0.00363816 | 0.054111232 | RHOA/RAC1 |
| BP | GO:0032233 | positive regulation of actin filament bundle assembly | 0.003758011 | 0.055117495 | RHOA/RAC1 |
| BP | GO:0010810 | regulation of cell-substrate adhesion | 0.0039897 | 0.057714014 | RHOA/PIK3R1/RAC1 |
| BP | GO:1901990 | regulation of mitotic cell cycle phase transition | 0.004109625 | 0.058395476 | PLK1/CUL1/BTRC/ANAPC10 |
| BP | GO:1903039 | positive regulation of leukocyte cell-cell adhesion | 0.004147406 | 0.058395476 | RHOA/PIK3R1/RAC1 |
| BP | GO:1903391 | regulation of adherens junction organization | 0.0045153 | 0.062126667 | RHOA/RAC1 |
| BP | GO:0007160 | cell-matrix adhesion | 0.004530069 | 0.062126667 | RHOA/PIK3R1/RAC1 |
| BP | GO:0010812 | negative regulation of cell-substrate adhesion | 0.00464783 | 0.062924461 | RHOA/PIK3R1 |
| BP | GO:0002429 | immune response-activating cell surface receptor signaling pathway | 0.005141934 | 0.068732683 | PIK3R1/RAC1/CUL1/BTRC |
| BP | GO:0000281 | mitotic cytokinesis | 0.005337222 | 0.070451334 | RHOA/PLK1 |
| BP | GO:1901987 | regulation of cell cycle phase transition | 0.005415045 | 0.070577028 | PLK1/CUL1/BTRC/ANAPC10 |
| BP | GO:1900182 | positive regulation of protein localization to nucleus | 0.005480413 | 0.070577028 | PIK3R1/PLK1 |
| BP | GO:0000086 | G2/M transition of mitotic cell cycle | 0.005869845 | 0.074681396 | PLK1/CUL1/BTRC |
| BP | GO:0022409 | positive regulation of cell-cell adhesion | 0.006409956 | 0.079281305 | RHOA/PIK3R1/RAC1 |
| BP | GO:0007045 | cell-substrate adherens junction assembly | 0.006531698 | 0.079281305 | RHOA/RAC1 |
| BP | GO:0031145 | anaphase-promoting complex-dependent catabolic process | 0.006531698 | 0.079281305 | PLK1/ANAPC10 |
| BP | GO:0048041 | focal adhesion assembly | 0.006531698 | 0.079281305 | RHOA/RAC1 |
| BP | GO:0110053 | regulation of actin filament organization | 0.006833983 | 0.082007795 | RHOA/PIK3R1/RAC1 |
| BP | GO:0140014 | mitotic nuclear division | 0.007052145 | 0.083674893 | RHOA/PLK1/FBXW5 |
| BP | GO:0044839 | cell cycle G2/M phase transition | 0.007199878 | 0.084478569 | PLK1/CUL1/BTRC |
| BP | GO:0048013 | ephrin receptor signaling pathway | 0.00733439 | 0.085111169 | RHOA/RAC1 |
| BP | GO:1901888 | regulation of cell junction assembly | 0.00766738 | 0.088008193 | RHOA/RAC1 |
| BP | GO:0032465 | regulation of cytokinesis | 0.007836408 | 0.088981148 | RHOA/PLK1 |
| BP | GO:0034333 | adherens junction assembly | 0.008007117 | 0.089952292 | RHOA/RAC1 |
| BP | GO:1903076 | regulation of protein localization to plasma membrane | 0.008885709 | 0.09877167 | PIK3R1/VAMP8 |
| BP | GO:0097193 | intrinsic apoptotic signaling pathway | 0.00903242 | 0.099356619 | PIK3R1/CUL1/SNW1 |
| CC | GO:0071013 | catalytic step 2 spliceosome | 2.67221E-15 | 3.55405E-13 | MAGOH/SRSF1/SNRPD1/SNRPD3/SNRPE/SNRPF/ALYREF/SNW1/SF3B1 |
| CC | GO:0031461 | cullin-RING ubiquitin ligase complex | 6.56628E-13 | 4.36657E-11 | GAN/CUL1/BTRC/ANAPC10/FBXL3/FBXO2/KLHL20/FBXW5/SPSB2 |
| CC | GO:0005681 | spliceosomal complex | 2.74569E-12 | 1.21725E-10 | MAGOH/SRSF1/SNRPD1/SNRPD3/SNRPE/SNRPF/ALYREF/SNW1/SF3B1 |
| CC | GO:0000151 | ubiquitin ligase complex | 1.20033E-10 | 3.99111E-09 | GAN/CUL1/BTRC/ANAPC10/FBXL3/FBXO2/KLHL20/FBXW5/SPSB2 |
| CC | GO:0005689 | U12-type spliceosomal complex | 3.12897E-10 | 7.26351E-09 | SNRPD1/SNRPD3/SNRPE/SNRPF/SF3B1 |
| CC | GO:0019005 | SCF ubiquitin ligase complex | 3.27677E-10 | 7.26351E-09 | CUL1/BTRC/FBXL3/FBXO2/FBXW5/SPSB2 |
| CC | GO:0071007 | U2-type catalytic step 2 spliceosome | 5.50721E-10 | 1.04637E-08 | SNRPD1/SNRPD3/SNRPE/SNRPF/SNW1 |
| CC | GO:0034709 | methylosome | 1.59744E-09 | 2.65574E-08 | SNRPD1/SNRPD3/SNRPE/SNRPF |
| CC | GO:0005687 | U4 snRNP | 2.30516E-09 | 3.40652E-08 | SNRPD1/SNRPD3/SNRPE/SNRPF |
| CC | GO:0005684 | U2-type spliceosomal complex | 2.65416E-09 | 3.53003E-08 | SNRPD1/SNRPD3/SNRPE/SNRPF/SNW1/SF3B1 |
| CC | GO:0071005 | U2-type precatalytic spliceosome | 8.03019E-09 | 9.70923E-08 | SNRPD1/SNRPD3/SNRPE/SNRPF/SF3B1 |
| CC | GO:0071011 | precatalytic spliceosome | 8.89438E-09 | 9.85793E-08 | SNRPD1/SNRPD3/SNRPE/SNRPF/SF3B1 |
| CC | GO:0034719 | SMN-Sm protein complex | 9.81749E-09 | 1.0044E-07 | SNRPD1/SNRPD3/SNRPE/SNRPF |
| CC | GO:0005686 | U2 snRNP | 5.58145E-08 | 5.30238E-07 | SNRPD1/SNRPD3/SNRPE/SF3B1 |
| CC | GO:0005685 | U1 snRNP | 2.08007E-07 | 1.84433E-06 | SNRPD1/SNRPD3/SNRPE/SNRPF |
| CC | GO:0097525 | spliceosomal snRNP complex | 2.58444E-07 | 2.14832E-06 | SNRPD1/SNRPD3/SNRPE/SNRPF/SF3B1 |
| CC | GO:0030532 | small nuclear ribonucleoprotein complex | 3.46882E-07 | 2.45565E-06 | SNRPD1/SNRPD3/SNRPE/SNRPF/SF3B1 |
| CC | GO:0046540 | U4/U6 x U5 tri-snRNP complex | 3.50807E-07 | 2.45565E-06 | SNRPD1/SNRPD3/SNRPE/SNRPF |
| CC | GO:0097526 | spliceosomal tri-snRNP complex | 3.50807E-07 | 2.45565E-06 | SNRPD1/SNRPD3/SNRPE/SNRPF |
| CC | GO:0120114 | Sm-like protein family complex | 5.70037E-07 | 3.79074E-06 | SNRPD1/SNRPD3/SNRPE/SNRPF/SF3B1 |
| CC | GO:0035145 | exon-exon junction complex | 2.87687E-06 | 1.82201E-05 | MAGOH/SRSF1/ALYREF |
| CC | GO:0005682 | U5 snRNP | 3.87891E-06 | 2.34497E-05 | SNRPD1/SNRPD3/SNRPE |
| CC | GO:0016607 | nuclear speck | 1.66072E-05 | 9.60332E-05 | MAGOH/SRSF1/SRSF7/ALYREF/SNW1/SF3B1 |
| CC | GO:0034708 | methyltransferase complex | 1.8831E-05 | 0.000104355 | SNRPD1/SNRPD3/SNRPE/SNRPF |
| CC | GO:0005697 | telomerase holoenzyme complex | 0.000401632 | 0.002136682 | SNRPD3/SNRPE |
| CC | GO:0031463 | Cul3-RING ubiquitin ligase complex | 0.001255981 | 0.006424824 | GAN/KLHL20 |
| CC | GO:0070820 | tertiary granule | 0.001588651 | 0.007825576 | RHOA/RAC1/VAMP8 |
| CC | GO:0043197 | dendritic spine | 0.001731157 | 0.008210817 | RHOA/RAC1/FBXO2 |
| CC | GO:0044309 | neuron spine | 0.001790328 | 0.008210817 | RHOA/RAC1/FBXO2 |
| CC | GO:0101003 | ficolin-1-rich granule membrane | 0.00337927 | 0.01498143 | RHOA/RAC1 |
| CC | GO:0055038 | recycling endosome membrane | 0.005879159 | 0.025223488 | RAC1/VAMP8 |
| CC | GO:0032587 | ruffle membrane | 0.007841805 | 0.032592503 | RHOA/RAC1 |
| CC | GO:0030667 | secretory granule membrane | 0.008466293 | 0.034121728 | RHOA/RAC1/VAMP8 |
| CC | GO:0019908 | nuclear cyclin-dependent protein kinase holoenzyme complex | 0.016913342 | 0.066161013 | SNW1 |
| CC | GO:0000346 | transcription export complex | 0.019705279 | 0.07280006 | ALYREF |
| CC | GO:0000940 | condensed chromosome outer kinetochore | 0.019705279 | 0.07280006 | PLK1 |
| CC | GO:0000778 | condensed nuclear chromosome kinetochore | 0.02109838 | 0.075840121 | PLK1 |
| CC | GO:0071004 | U2-type prespliceosome | 0.022489571 | 0.076695202 | SF3B1 |
| CC | GO:0071010 | prespliceosome | 0.022489571 | 0.076695202 | SF3B1 |
| CC | GO:0005847 | mRNA cleavage and polyadenylation specificity factor complex | 0.023878855 | 0.077068954 | CPSF2 |
| CC | GO:0031256 | leading edge membrane | 0.024120639 | 0.077068954 | RHOA/RAC1 |
| CC | GO:0001726 | ruffle | 0.024650368 | 0.077068954 | RHOA/RAC1 |
| CC | GO:0030496 | midbody | 0.02491703 | 0.077068954 | RHOA/PLK1 |
| CC | GO:0055037 | recycling endosome | 0.025724163 | 0.07775713 | RAC1/VAMP8 |
| CC | GO:0005849 | mRNA cleavage factor complex | 0.028035294 | 0.08150954 | CPSF2 |
| CC | GO:0101002 | ficolin-1-rich granule | 0.02820903 | 0.08150954 | RHOA/RAC1 |
| CC | GO:0005680 | anaphase-promoting complex | 0.029416977 | 0.08150954 | ANAPC10 |
| CC | GO:0032806 | carboxy-terminal domain protein kinase complex | 0.029416977 | 0.08150954 | SNW1 |
| CC | GO:0030027 | lamellipodium | 0.030496087 | 0.081919397 | RHOA/RAC1 |
| CC | GO:0097038 | perinuclear endoplasmic reticulum | 0.030796766 | 0.081919397 | PIK3R1 |
| CC | GO:0000780 | condensed nuclear chromosome, centromeric region | 0.036297031 | 0.094656964 | PLK1 |
| CC | GO:0005942 | phosphatidylinositol 3-kinase complex | 0.037667387 | 0.096341587 | PIK3R1 |
| CC | GO:0005732 | small nucleolar ribonucleoprotein complex | 0.039035864 | 0.097957924 | SNRPF |
| MF | GO:0004842 | ubiquitin-protein transferase activity | 0.001887681 | 0.060232821 | BTRC/FBXL3/FBXO2/KLHL20 |
| MF | GO:0045309 | protein phosphorylated amino acid binding | 0.002341359 | 0.060232821 | PIK3R1/BTRC |
| MF | GO:0019787 | ubiquitin-like protein transferase activity | 0.002377611 | 0.060232821 | BTRC/FBXL3/FBXO2/KLHL20 |
| MF | GO:0061630 | ubiquitin protein ligase activity | 0.003607549 | 0.061328755 | BTRC/FBXL3/FBXO2 |
| MF | GO:0061659 | ubiquitin-like protein ligase activity | 0.004034786 | 0.061328755 | BTRC/FBXL3/FBXO2 |
| MF | GO:0051219 | phosphoprotein binding | 0.006078888 | 0.076999254 | PIK3R1/BTRC |
| MF | GO:0005165 | neurotrophin receptor binding | 0.01404077 | 0.0952469 | PIK3R1 |
| MF | GO:0019869 | chloride channel inhibitor activity | 0.01404077 | 0.0952469 | VAMP8 |
| MF | GO:0036312 | phosphatidylinositol 3-kinase regulatory subunit binding | 0.01404077 | 0.0952469 | PIK3R1 |
| MF | GO:0043021 | ribonucleoprotein complex binding | 0.015019941 | 0.0952469 | SNRPD1/SNRPD3 |
| MF | GO:0031996 | thioesterase binding | 0.015434391 | 0.0952469 | RAC1 |
| MF | GO:0043560 | insulin receptor substrate binding | 0.015434391 | 0.0952469 | PIK3R1 |
| MF | GO:0005068 | transmembrane receptor protein tyrosine kinase adaptor activity | 0.018215963 | 0.0952469 | PIK3R1 |
| MF | GO:0046935 | 1-phosphatidylinositol-3-kinase regulator activity | 0.019603918 | 0.0952469 | PIK3R1 |
| MF | GO:0042809 | vitamin D receptor binding | 0.02098999 | 0.0952469 | SNW1 |
| MF | GO:0005159 | insulin-like growth factor receptor binding | 0.02237418 | 0.0952469 | PIK3R1 |
| MF | GO:0017081 | chloride channel regulator activity | 0.023756491 | 0.0952469 | VAMP8 |
| MF | GO:0035014 | phosphatidylinositol 3-kinase regulator activity | 0.023756491 | 0.0952469 | PIK3R1 |
| MF | GO:0030674 | protein binding, bridging | 0.023811725 | 0.0952469 | PIK3R1/SPSB2 |
| KEGG | hsa03040 | Spliceosome | 1.14526E-12 | 1.50029E-10 | MAGOH/SRSF1/SRSF7/SNRPD1/SNRPD3/SNRPE/SNRPF/ALYREF/SNW1/SF3B1 |
| KEGG | hsa04710 | Circadian rhythm | 6.50065E-05 | 0.004257926 | CUL1/BTRC/FBXL3 |
| KEGG | hsa04114 | Oocyte meiosis | 0.000301201 | 0.010785484 | PLK1/CUL1/BTRC/ANAPC10 |
| KEGG | hsa05131 | Shigellosis | 0.000343378 | 0.010785484 | RHOA/PIK3R1/RAC1/CUL1/BTRC |
| KEGG | hsa04120 | Ubiquitin mediated proteolysis | 0.00041166 | 0.010785484 | CUL1/BTRC/ANAPC10/FBXO2 |
| KEGG | hsa04310 | Wnt signaling pathway | 0.000682589 | 0.014903202 | RHOA/RAC1/CUL1/BTRC |
| KEGG | hsa05100 | Bacterial invasion of epithelial cells | 0.00097956 | 0.018331763 | RHOA/PIK3R1/RAC1 |
| KEGG | hsa05210 | Colorectal cancer | 0.001349983 | 0.022105974 | RHOA/PIK3R1/RAC1 |
| KEGG | hsa05203 | Viral carcinogenesis | 0.001687992 | 0.022746874 | RHOA/PIK3R1/RAC1/SNW1 |
| KEGG | hsa03015 | mRNA surveillance pathway | 0.001909476 | 0.022746874 | MAGOH/ALYREF/CPSF2 |
| KEGG | hsa05170 | Human immunodeficiency virus 1 infection | 0.001944411 | 0.022746874 | PIK3R1/RAC1/CUL1/BTRC |
| KEGG | hsa04914 | Progesterone-mediated oocyte maturation | 0.002083683 | 0.022746874 | PIK3R1/PLK1/ANAPC10 |
| KEGG | hsa04670 | Leukocyte transendothelial migration | 0.003027006 | 0.029584679 | RHOA/PIK3R1/RAC1 |
| KEGG | hsa04071 | Sphingolipid signaling pathway | 0.003418216 | 0.029584679 | RHOA/PIK3R1/RAC1 |
| KEGG | hsa04722 | Neurotrophin signaling pathway | 0.003418216 | 0.029584679 | RHOA/PIK3R1/RAC1 |
| KEGG | hsa04110 | Cell cycle | 0.003839233 | 0.029584679 | PLK1/CUL1/ANAPC10 |
| KEGG | hsa04611 | Platelet activation | 0.003839233 | 0.029584679 | RHOA/PIK3R1/VAMP8 |
| KEGG | hsa05135 | Yersinia infection | 0.005078356 | 0.036459595 | RHOA/PIK3R1/RAC1 |
| KEGG | hsa05418 | Fluid shear stress and atherosclerosis | 0.005288033 | 0.036459595 | RHOA/PIK3R1/RAC1 |
| KEGG | hsa04340 | Hedgehog signaling pathway | 0.007318099 | 0.047933547 | CUL1/BTRC |
| KEGG | hsa04370 | VEGF signaling pathway | 0.010078817 | 0.062872619 | PIK3R1/RAC1 |
| KEGG | hsa04360 | Axon guidance | 0.010940723 | 0.06514703 | RHOA/PIK3R1/RAC1 |
| KEGG | hsa04062 | Chemokine signaling pathway | 0.012834053 | 0.06882186 | RHOA/PIK3R1/RAC1 |
| KEGG | hsa04664 | Fc epsilon RI signaling pathway | 0.013231734 | 0.06882186 | PIK3R1/RAC1 |
| KEGG | hsa05211 | Renal cell carcinoma | 0.013605485 | 0.06882186 | PIK3R1/RAC1 |
| KEGG | hsa04520 | Adherens junction | 0.014366753 | 0.06882186 | RHOA/RAC1 |
| KEGG | hsa04510 | Focal adhesion | 0.014515725 | 0.06882186 | RHOA/PIK3R1/RAC1 |
| KEGG | hsa05169 | Epstein-Barr virus infection | 0.014710016 | 0.06882186 | PIK3R1/RAC1/SNW1 |
| KEGG | hsa05205 | Proteoglycans in cancer | 0.01530186 | 0.069088154 | RHOA/PIK3R1/RAC1 |
| KEGG | hsa04015 | Rap1 signaling pathway | 0.016318273 | 0.069088154 | RHOA/PIK3R1/RAC1 |
| KEGG | hsa05212 | Pancreatic cancer | 0.016349105 | 0.069088154 | PIK3R1/RAC1 |
| KEGG | hsa04024 | cAMP signaling pathway | 0.017587712 | 0.071545706 | RHOA/PIK3R1/RAC1 |
| KEGG | hsa04810 | Regulation of actin cytoskeleton | 0.018022964 | 0.071545706 | RHOA/PIK3R1/RAC1 |
| KEGG | hsa04662 | B cell receptor signaling pathway | 0.018873863 | 0.072719886 | PIK3R1/RAC1 |
| KEGG | hsa05163 | Human cytomegalovirus infection | 0.019594193 | 0.073338264 | RHOA/PIK3R1/RAC1 |
| KEGG | hsa04014 | Ras signaling pathway | 0.021240103 | 0.077290374 | RHOA/PIK3R1/RAC1 |
| KEGG | hsa04350 | TGF-beta signaling pathway | 0.024381857 | 0.086324953 | RHOA/CUL1 |
| KEGG | hsa04666 | Fc gamma R-mediated phagocytosis | 0.025850814 | 0.087578774 | PIK3R1/RAC1 |
| KEGG | hsa05231 | Choline metabolism in cancer | 0.026348404 | 0.087578774 | PIK3R1/RAC1 |
| KEGG | hsa04933 | AGE-RAGE signaling pathway in diabetic complications | 0.02735536 | 0.087578774 | PIK3R1/RAC1 |
| KEGG | hsa04972 | Pancreatic secretion | 0.028377873 | 0.087578774 | RHOA/RAC1 |
| KEGG | hsa04620 | Toll-like receptor signaling pathway | 0.029415771 | 0.087578774 | PIK3R1/RAC1 |
| KEGG | hsa04625 | C-type lectin receptor signaling pathway | 0.029415771 | 0.087578774 | RHOA/PIK3R1 |
| KEGG | hsa04660 | T cell receptor signaling pathway | 0.029415771 | 0.087578774 | RHOA/PIK3R1 |
